# Supplementary material for: Design, synthesis, and biological evaluation of quinazolin-4(3H)-one derivatives co-targeting poly(ADP-ribose) polymerase-1 and bromodomain containing protein 4 for breast cancer therapy
Source: PubMed Central journal article supplement — Acta Pharm Sin B. 2020 Jun 24;11(1):156–80. doi: 10.1016/j.apsb.2020.06.003 (PMC7838034; doi:10.1016/j.apsb.2020.06.003), 2020-06-24

# Supporting Information for

## Original article

### Design, synthesis, and biological evaluation of quinazolin-4(3*H*)-one derivatives co-targeting poly(ADP-ribose) polymerase-1 and bromodomain containing protein 4 for breast cancer therapy

Xiaosa Chang<sup>†</sup>, Dejuan Sun<sup>†</sup>, Danfeng Shi<sup>†</sup>, Guan Wang, Yanmei Chen, Kai Zhang, Huidan Tan, Jie Liu<sup>\*</sup>, Bo Liu<sup>\*</sup>, Liang Ouyang<sup>\*</sup>

*State Key Laboratory of Biotherapy and Cancer Center, West China Hospital, and Collaborative Innovation Center of Biotherapy, Sichuan University, Chengdu 610041, China*

<sup>†</sup>These authors made equal contributions to this work.

Received 27 February 2020; received in revised form 8 May 2020; accepted 28 May 2020

<sup>\*</sup>Corresponding authors. Tel./fax: +86 28 85503817 (Jie Liu), +86 28 85164063 (Bo Liu), +86 28 85503817 (Liang Ouyang).

E-mail addresses: [liujie2011@scu.edu.cn](mailto:liujie2011@scu.edu.cn) (Jie Liu), [liubo2400@163.com](mailto:liubo2400@163.com) (Bo Liu), [ouyangliang@scu.edu.cn](mailto:ouyangliang@scu.edu.cn) (Liang Ouyang).

| Table of contents                                                                                                                     | Page |
|---------------------------------------------------------------------------------------------------------------------------------------|------|
| <b>1. Supplementary results</b>                                                                                                       | S1   |
| <b>Figure S1</b> Three breast cancer cell inhibitory activity of 42 candidate compounds.                                              | S2   |
| <b>Figure S2</b> Target-binding series development from initial compound.                                                             | S3   |
| <b>Figure S3</b> Immunohistochemical staining in the MCF-7 tumor tissues.                                                             | S3   |
| <b>Figure S4</b> Hematoxylin and eosin (H&E) to evaluate the toxicity of compound <b>19d</b> in the MDA-MB-468 tumor xenograft model. | S4   |
| <b>Figure S5</b> Hematoxylin and eosin (H&E) to evaluate the toxicity of compound <b>19d</b> in the MCF-7 tumor xenograft model.      | S5   |
| <b>Figure S6</b> Effect of <b>19d</b> on MCF-7 cells cell cycle progression.                                                          | S6   |
| <b>Figure S7</b> IC <sub>50</sub> of compound <b>19d</b> and Rvx-208 against BRD4(BD1) and BRD4(BD2).                                 | S6   |
| <b>Figure S8</b> The 2D interactive modes of <b>19d</b> , RVX-208 and Olaparib.                                                       | S7   |
| <b>Table S1</b> 22 PARP1 inhibitors.                                                                                                  | S8   |
| <b>Table S2</b> 71 BRD4 inhibitors.                                                                                                   | S14  |
| <b>2. NMR Spectra</b>                                                                                                                 | S30  |
| <b>3. Representative HPLC traces of biologically tested compounds</b>                                                                 | S73  |
| <b>4. HRMS spectra</b>                                                                                                                | S85  |

# 1. Supplementary results

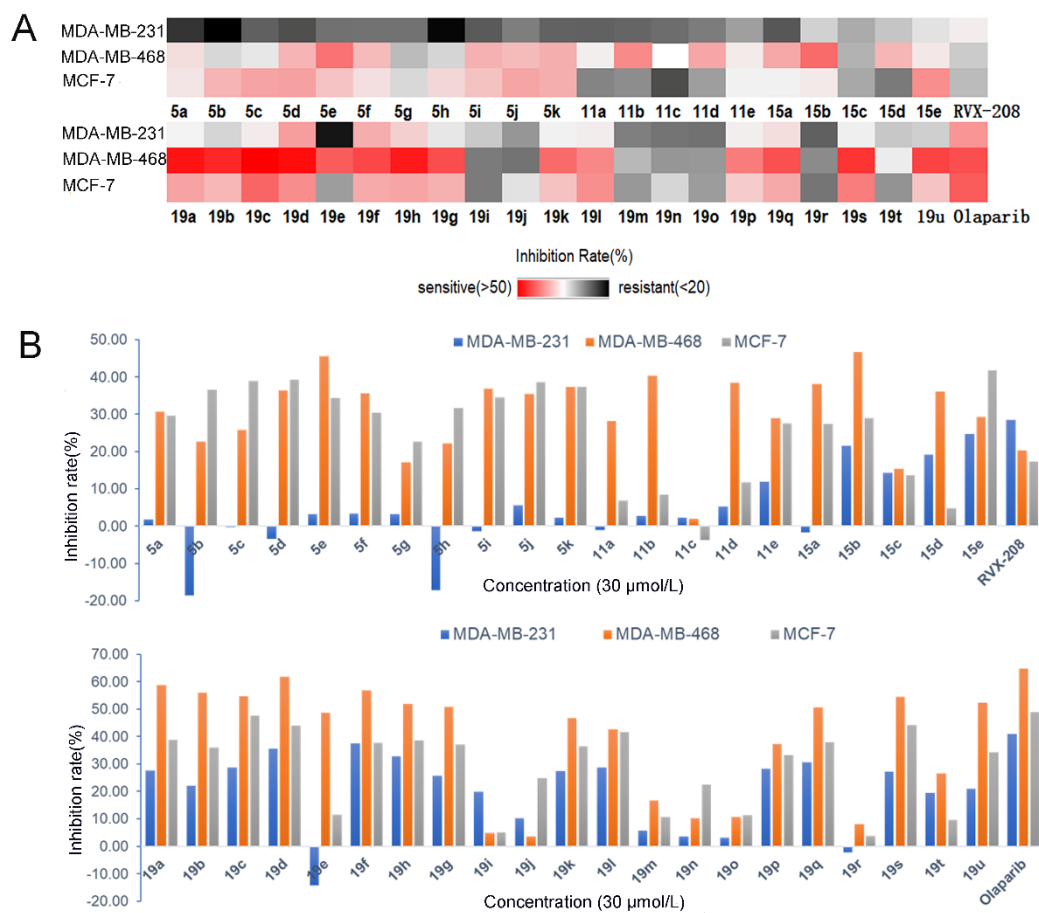

**Figure S1** Cell viabilities were measured for top 42 candidate compounds by MTT assay. (A) Heat map of inhibition rate of anti-proliferative activity of compounds. (B) Histogram of inhibition rate of anti-proliferative activity of compounds. The cancer cell inhibitory activity of MDA-MB-231 cell, MDA-MB-468 cell and MCF-7 cell of top 42 candidate compounds were detected at 30  $\mu\text{mol/L}$ .

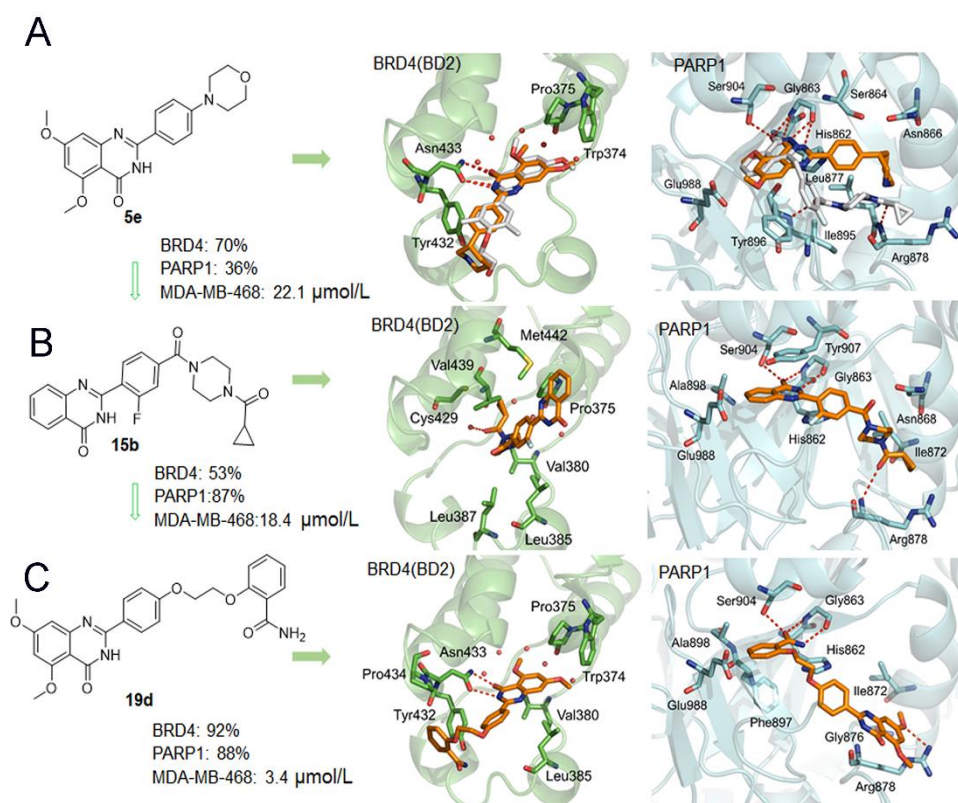

**Figure S2** Target-binding series development from initial compound. Representative examples of target-binding compounds **5e** to **19d** guided by structural information. (A) Docking structures with the mode of binding of compound **5e** and Rvx-208 to BRD4(BD2) and PARP-1 in the pocket, respectively. (B) Docking structures with the mode of binding of compound **15b** and Rvx-208 to BRD4(BD2) and PARP1 in the pocket, respectively. (C) Binding mode of **19d** in the active site of BRD4(BD2) and PARP1, respectively. BRD4(BD2) (PDB code: 5UOO) was shown in green, PARP-1 (PDB code: 5DS3) was shown in grey.

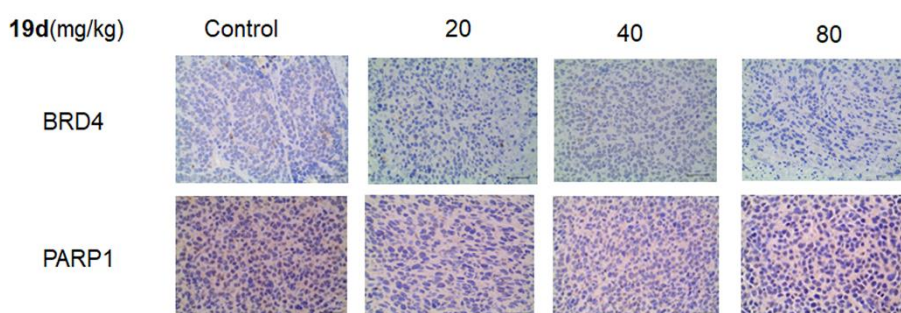

**Figure S3** Immunohistochemical staining of PARP1 and BRD4 in the MCF-7 tumor tissues from **19d**-treated mice and vehicle groups (200 $\times$ ).

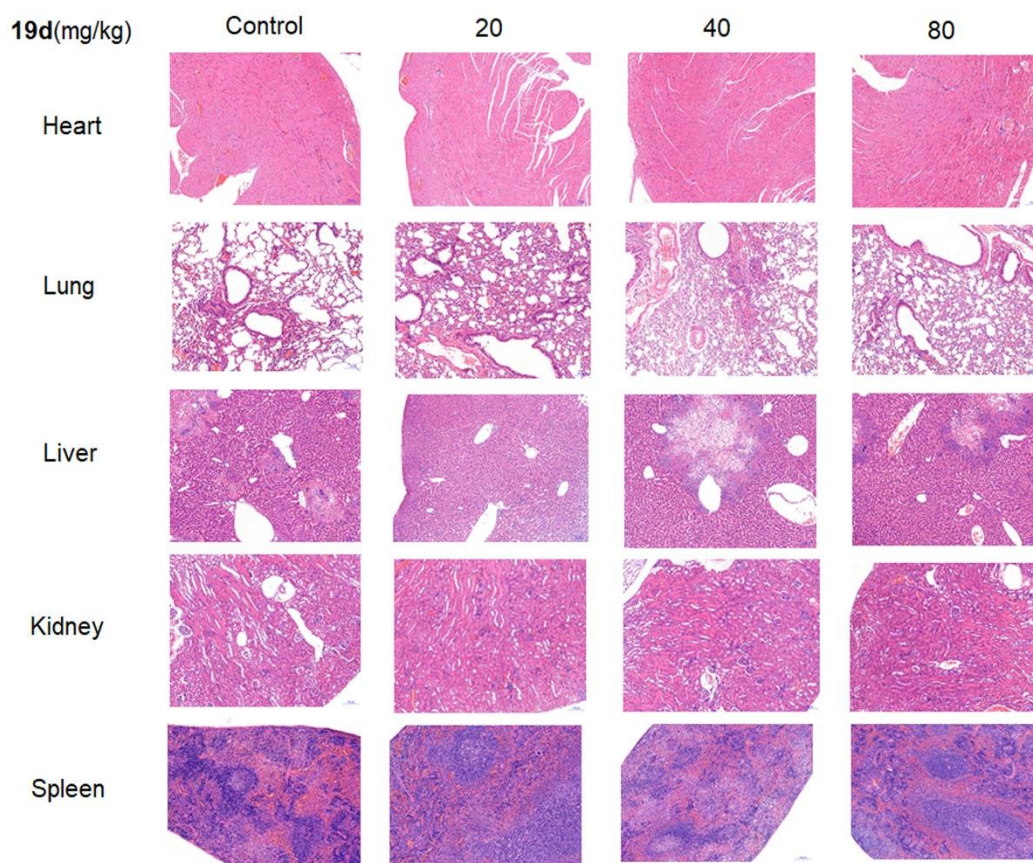

**Figure S4** Various mouse organs from treated and control groups were stained with hematoxylin and eosin (H&E) to evaluate the toxicity of compound **19d** in the MDA-MB-468 tumor xenograft model. Photographs were obtained under magnification,  $\times 100$ .

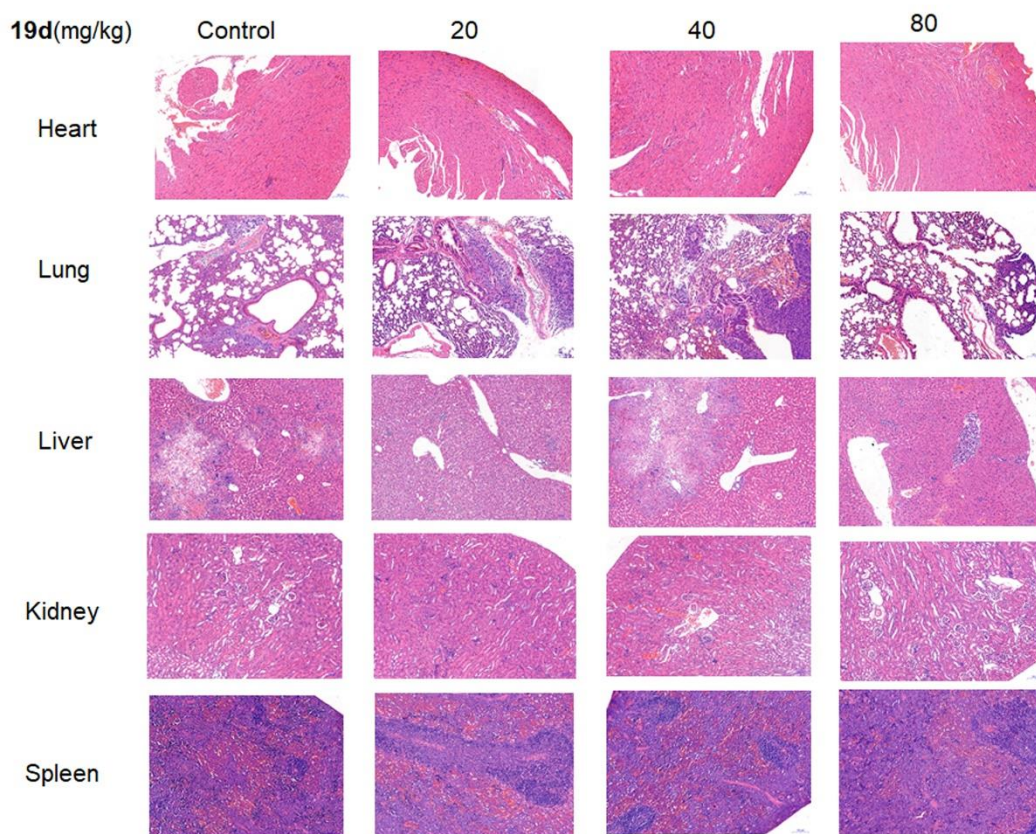

**Figure S5** Various mouse organs from treated and control groups were stained with hematoxylin and eosin (H&E) to evaluate the toxicity of compound **19d** in the MCF-7 tumor xenograft model. Photographs were obtained under magnification,  $\times 100$ .

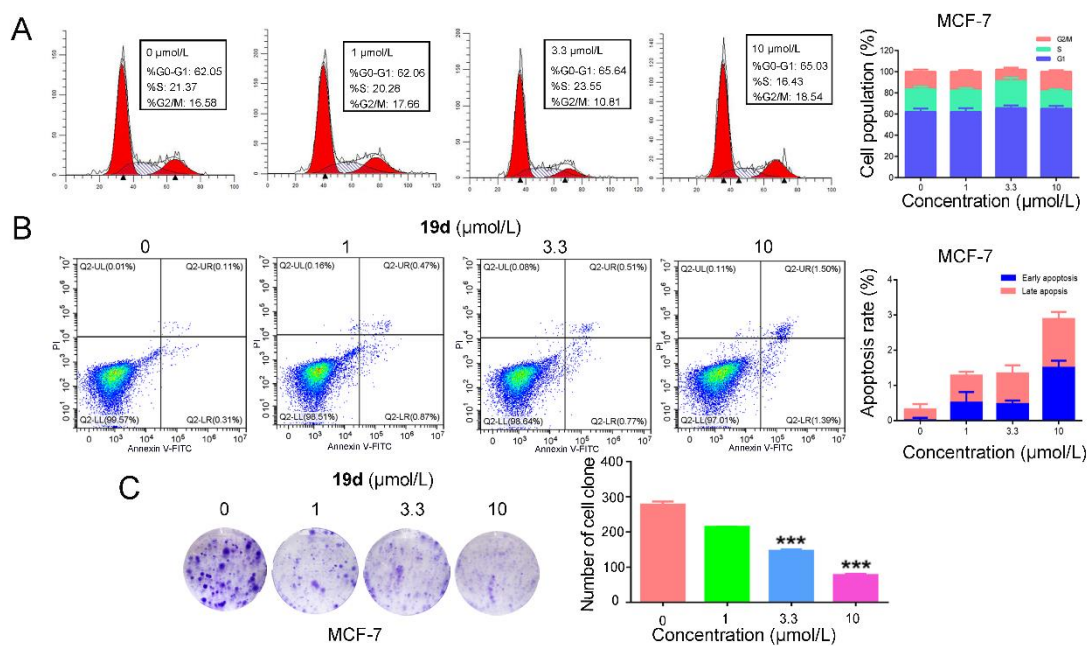

**Figure S6** Effect of **19d** on MCF-7 cells cell cycle progression. (A) Cell cycle distribution was measured by flow cytometry using PI stain with 0, 1, 3.3 and 10 μmol/L of **19d** separately treated MCF-7 cells. (B) Apoptosis rates were detected by Annexin V-FITC/PI staining after treatment with **19d**. (C) Clonogenic survival assay of MCF-7 cells was measured by after treatment with Compound **19d**. The statistics of clonogenic survival assay. \*\*\* $P < 0.001$  compared with control group. Data are present as means  $\pm$  SDs,  $n = 3$ .

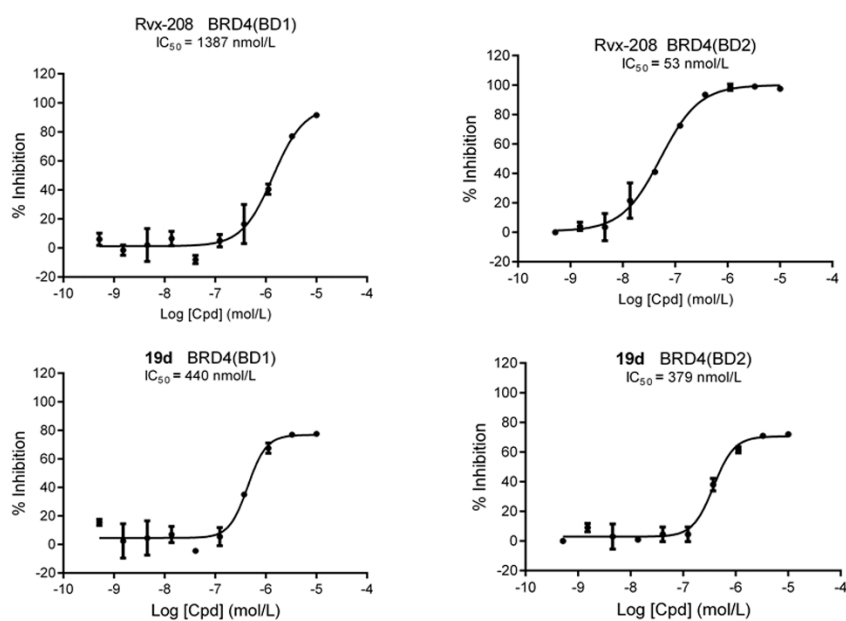

**Figure S7** The  $IC_{50}$  values of Rvx-208 and compound **19d** against BRD4(BD1) and BRD4(BD2), respectively.

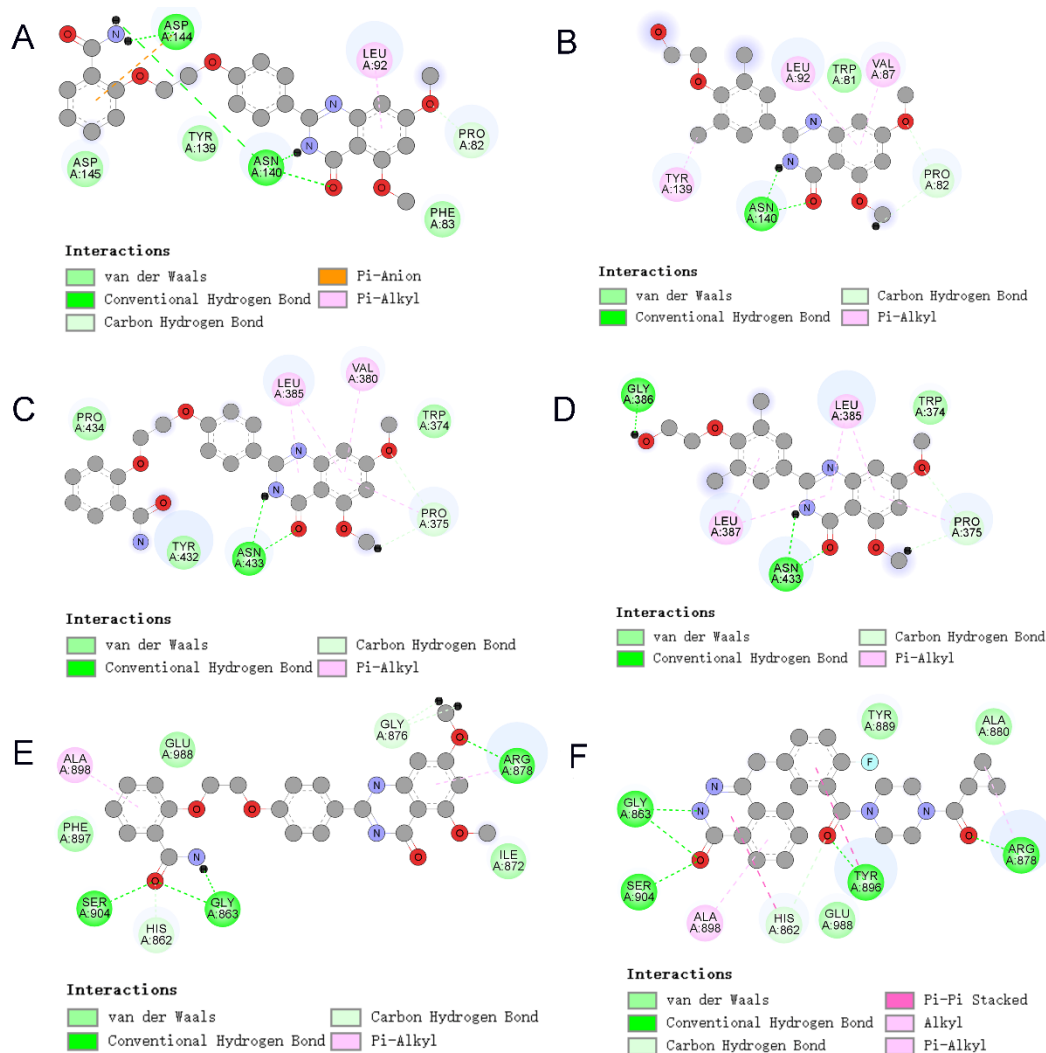

**Figure S8** The 2D interactive modes of **19d**, RVX-208 and Olaparib. (A) and (B) Interactive modes of **19d** and RVX-208 in the BD1 domain of BRD4. (C) and (D) Interactive modes of **19d** and RVX-208 in the BD2 domain of BRD4. (E) and (F) Interactive modes of **19d** and Olaparib in the active site of PARP1.

**Table S1 22** PARP1 inhibitors.

| No.                                               | Structure/Name                                                                                   | Core                                                                                | Fragments                                                                           | IC <sub>50</sub> & Target                                                                 | Ref. |
|---------------------------------------------------|--------------------------------------------------------------------------------------------------|-------------------------------------------------------------------------------------|-------------------------------------------------------------------------------------|-------------------------------------------------------------------------------------------|------|
| <b>Type 1: benzoamide-based</b>                   |                                                                                                  |                                                                                     |                                                                                     |                                                                                           |      |
| 1                                                 | 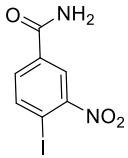<br>Iniparib    |    |    | Used in the research of TNBC                                                              | 1,2  |
| 2                                                 |                 |    |    | CHO cells:<br>IC <sub>50</sub> = 50 nmol/L                                                | 3    |
| 3                                                 | <br>Veliparib   |    |    | PARP1:<br>IC <sub>50</sub> = 5.2 nmol/L<br>PARP2:<br>IC <sub>50</sub> = 2.9 nmol/L        | 4    |
| 4                                                 | <br>NMS-P515   |   |   | PARP-1: 27<br>nmol/L (IC <sub>50</sub> , in HeLa cells)                                   | 5    |
| 5                                                 | <br>Niraparib |  |  | PARP1:<br>IC <sub>50</sub> = 3.8 nmol/L<br>PARP2:<br>IC <sub>50</sub> = 2.1 nmol/L        | 6    |
| 6                                                 |               |  |  | PARP1:<br>IC <sub>50</sub> = 43.7 nmol/L<br>HCT116 cell:<br>IC <sub>50</sub> = 7.4 μmol/L | 7    |
| 7                                                 |               |  |  | PARP-1:<br>IC <sub>50</sub> = 21.8 nmol                                                   | 7    |
| <b>Type 2: tricyclic indole carboxamide-based</b> |                                                                                                  |                                                                                     |                                                                                     |                                                                                           |      |
| 8                                                 | <br>Rucaparib |  |  | PARP1:<br>K <sub>i</sub> = 1.4 nmol/L                                                     | 8    |



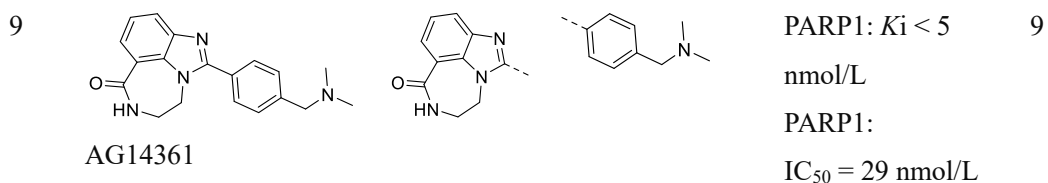

Type 3: tricyclic indole carboxamide-based

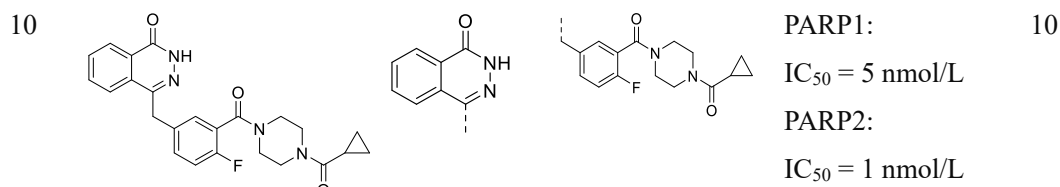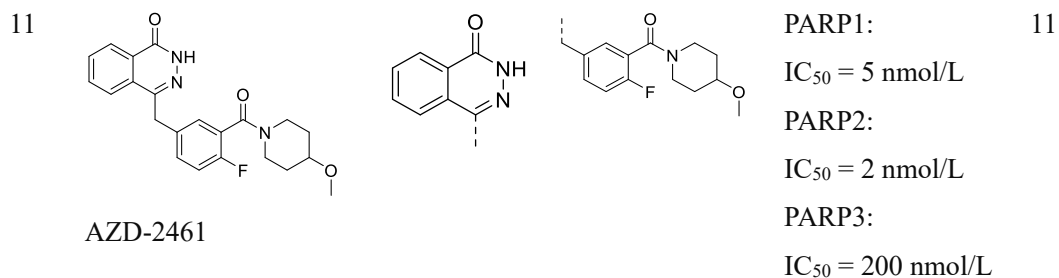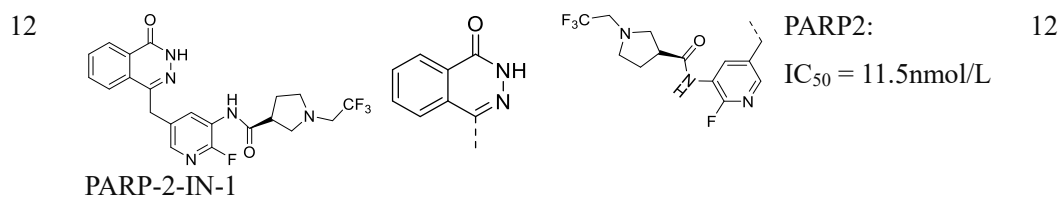

Type 4: phthalazine ketones

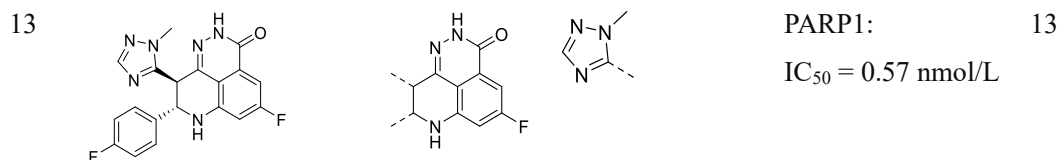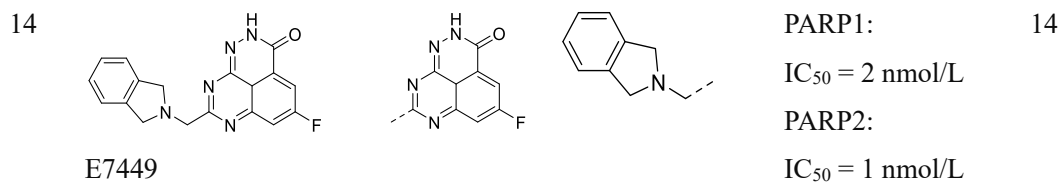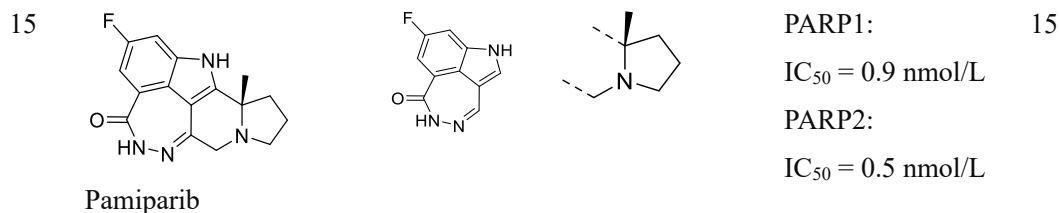

Type 5: isoindolinone-based

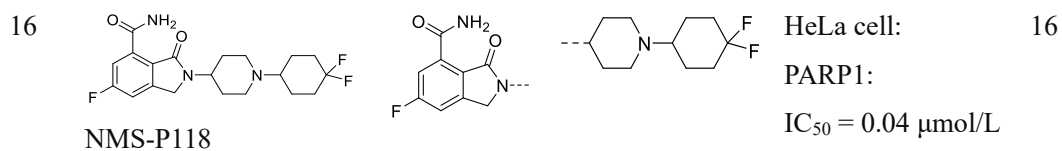

Type 6: benzofuran-based

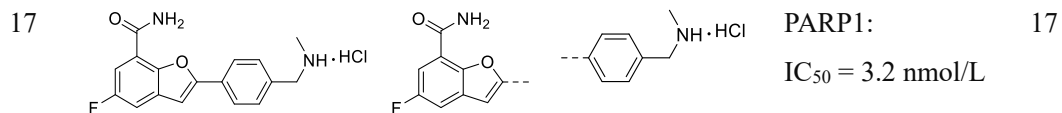

Type 7: nicotinamide oximes

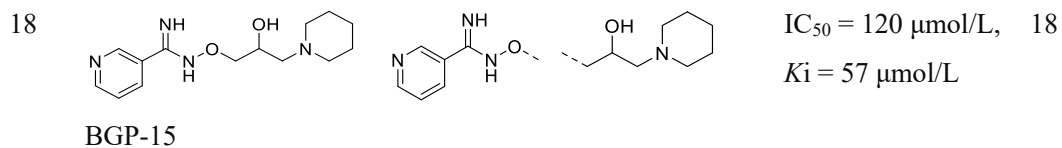

Others

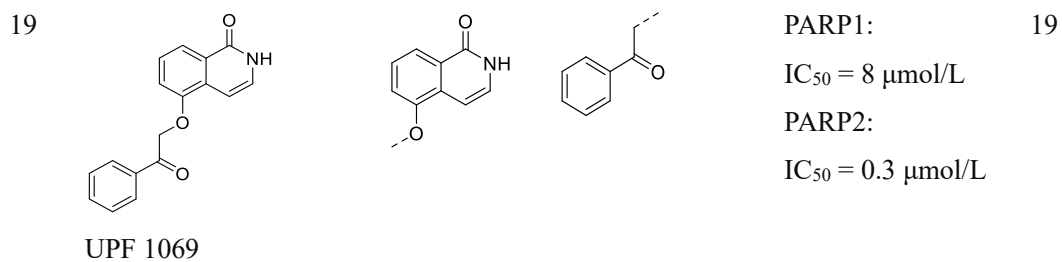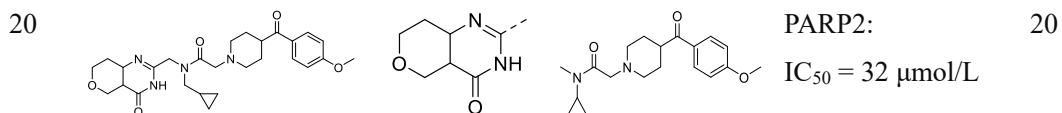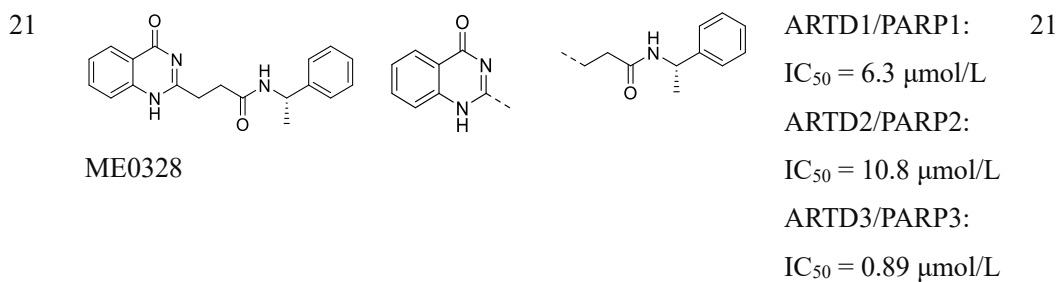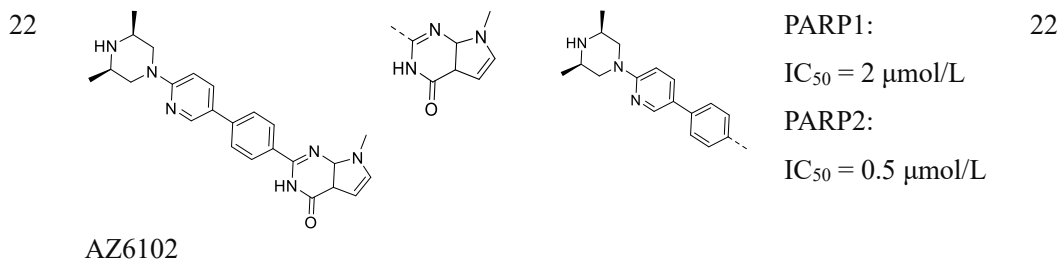

## Reference

1. Ma W, Halweg CJ, Menendez D, Resnick MA. Differential effects of poly(ADP-ribose) polymerase inhibition on DNA break repair in human cells are revealed with Epstein-Barr virus. *Proc Natl Acad Sci U S A* 2012;**109**:6590–5.
2. Yin S, Cheryan VT, Xu L, Rishi AK, Reddy KB. Myc mediates cancer stem-like cells and EMT changes in triple negative breast cancers cells. *PLoS One* 2017;**12**:e0183578.
3. Radovits T, Lin LN, Zotkina J, Gero D, Szabó C, Karcik M, et al. Poly(ADP-ribose) polymerase inhibition improves endothelial dysfunction induced by reactive oxidant hydrogen peroxide *in vitro*. *Eur J Pharmacol* 2007;**564**:158–66.
4. Donawho CK, Luo Y, Penning TD, Bauch JL, Bouska JJ, Bontcheva-Diaz VD, et al. ABT-888, an orally active poly(ADP-ribose) polymerase inhibitor that potentiates DNA-damaging agents in preclinical tumor models. *Clin Cancer Res* 2007;**13**:2728–37.
5. Papeo G, Orsini P, Avanzi NR, Borghi D, Casale E, Ciomei M, et al. Discovery of stereospecific PARP-1 inhibitor isoindolinone NMS-P515. *ACS Med Chem Lett* 2019;**10**:534–8.
6. Jones P, Ferrigno F, Fonsi M, Giomini C, Lamartina S, Monteagudo E, et al. Discovery of 2-{4-[(3*S*)-piperidin-3-yl]phenyl}-2*H*-indazole-7-carboxamide (MK-4827): a novel oral poly(ADP-ribose)polymerase (PARP) inhibitor efficacious in BRCA-1 and -2 mutant tumors. *J Med Chem* 2009;**52**:7170–85.
7. Wang J, Wang X, LI H, Ji D, Li Y, Xu Y, et al. Design, synthesis and biological evaluation of novel 5-fluoro-1*H*-benzimidazole-4-carboxamide derivatives as potent PARP-1 inhibitors. *ACS Med Chem Lett* 2016;**26**:4127–32.
8. Thomas HD, Calabrese CR, Batey MA, Canan S, Hostomsky Z, Kyle S, et al. Preclinical selection of a novel poly(ADP-ribose) polymerase inhibitor for clinical trial. *Mol Cancer Ther* 2007;**6**:945–56.
9. Calabrese CR, Almasy R, Barton S, Batey MA, Calvert AH, Canan-Koch S, et al. Anticancer chemosensitization and radiosensitization by the novel poly(ADP-ribose) polymerase-1 inhibitor AG14361. *J Natl Cancer Inst* 2004;**96**:56–67.
10. Menear KA, Adcock C, Boulter R, Cockcroft XL, Copsey L, Cranston A, et al. 4-[3-(4-Cyclopropanecarbonylpiperazine-1-carbonyl)-4-fluorobenzyl]-2*H*-phthalazi

- n-1-one: a novel bioavailable inhibitor of poly(ADP-ribose) polymerase-1. *J Med Chem* 2008;**51**:6581–91.
11. Jaspers JE, Kersbergen A, Boon U, Sol W, van Deemter L, Zander SA, et al. Loss of 53BP1 causes PARP inhibitor resistance in Brca1-mutated mouse mammary tumors. *Cancer Discov* 2013;**3**:68–81.
  12. Zhao H, Ji M, Cui G, Zhou J, Lai F, Chen X, et al. Discovery of novel quinazoline-2,4(1*H*,3*H*)-dione derivatives as potent PARP-2 selective inhibitors. *Bioorg Med Chem* 2017;**25**:4045–54.
  13. Shen Y, Rehman FL, Feng Y, Boshuizen J, Bajrami I, Elliott R, et al. BMN 673, a novel and highly potent PARP1/2 inhibitor for the treatment of human cancers with DNA repair deficiency. *Clin Cancer Res* 2013;**19**:5003–15.
  14. McGonigle S, Chen Z, Wu J, Chang P, Kolber-Simonds D, Ackermann K, et al. E7449: A dual inhibitor of PARP1/2 and tankyrase1/2 inhibits growth of DNA repair deficient tumors and antagonizes Wnt signaling. *Oncotarget* 2015;**6**:41307–23.
  15. Changyou Z. Fused tetra or penta-cyclic dihydrodiazepinocarbazolones as parp inhibitors. WO 2013097225 A1. 2013 Sep 9.
  16. Papeo G, Borghi D, Busel AA, Caprera F, Casale E, Ciomei M, et al. Discovery of 2-[1-(4,4-difluorocyclohexyl)piperidin-4-yl]-6-fluoro-3-oxo-2,3-dihydro-1*H*-isoindole-4-carboxamide (NMS-P118): a potent, orally available, and highly selective PARP-1 inhibitor for cancer therapy. *J Med Chem* 2015;**58**:6875–98.
  17. He JX, Wang M, Huan XJ. Novel PARP1/2 inhibitor mefuparib hydrochloride elicits potent *in vitro* and *in vivo* anticancer activity, characteristic of high tissue distribution. *Oncotarget* 2017;**8**:4156–68.
  18. Sarszegi Z, Bognar E, Gaszner B, Kónyi A, Gallyas F Jr, Sumegi B, et al. BGP-15, a PARP-inhibitor, prevents imatinib-induced cardiotoxicity by activating Akt and suppressing JNK and p38 MAP kinases. *Mol Cell Biochem* 2012;**365**:129–37.
  19. Pellicciari R, Camaioni E, Costantino G, Formentini L, Sabbatini P, Venturoni F, et al. On the way to selective PARP-2 inhibitors. Design, synthesis, and preliminary evaluation of a series of isoquinolinone derivatives. *ChemMedChem* 2008;**3**:914–23.

20. Shultz MD, Cheung AK, Kirby CA, Firestone B, Fan J, Chen CH, et al. Identification of NVP-TNKS656: the use of structure–efficiency relationships to generate a highly potent, selective, and orally active tankyrase inhibitor. *J Med Chem* 2013;**56**:6495–511.
21. Lindgren AE, Karlberg T, Thorsell AG, Hesse M, Spjut S, Ekblad T, et al. PARP inhibitor with selectivity toward ADP-ribosyltransferase ARTD3/PARP3. *ACS Chem Biol* 2013;**8**:1698–703.
22. Johannes JW, Almeida L, Barlaam B, Boriack-Sjodin PA, Casella R, Croft RA, et al. Pyrimidinone nicotinamide mimetics as selective tankyrase and wnt pathway inhibitors suitable for *in vivo* pharmacology. *ACS Med Chem Lett* 2015;**6**:254–9.

**Table S2** 71 BRD4 inhibitors.

| No.                            | structure                                                                           | Core                                                                                | Fragment                                                                             | IC <sub>50</sub> & Target                                                           | Ref. |
|--------------------------------|-------------------------------------------------------------------------------------|-------------------------------------------------------------------------------------|--------------------------------------------------------------------------------------|-------------------------------------------------------------------------------------|------|
| Type 1: triazoloazepine        |                                                                                     |                                                                                     |                                                                                      |                                                                                     |      |
| 1                              | 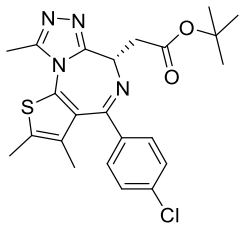   |    |     | BRD4(1): IC <sub>50</sub> = 77 nmol/L;<br>BRD4(2): IC <sub>50</sub> = 33 nmol/L     | 1    |
| (+)-JQ1                        |                                                                                     |                                                                                     |                                                                                      |                                                                                     |      |
| 2                              |    |    |     | BRD4-BD1: IC <sub>50</sub> = 39 nmol/L                                              | 2    |
| CPI-0610                       |                                                                                     |                                                                                     |                                                                                      |                                                                                     |      |
| 3                              |   |   |    | BRD4(1): IC <sub>50</sub> = 10 nmol/L;<br>MV4-11 cell: IC <sub>50</sub> = 80 nmol/L | 3    |
| 4                              |  |  |  | BRD4(1): IC <sub>50</sub> = 20 nmol/L                                               | 4    |
| 5                              |  |  |   | BRD4(1): IC <sub>50</sub> = 20 nmol/L;<br>MYC: IC <sub>50</sub> = 32 nmol/L         | 5    |
| 6                              |  |  |   | BRD4(1): IC <sub>50</sub> = 77 nmol/L;<br>BRD4(2): IC <sub>50</sub> = 33 nmol/L     | 6    |
| Type 2: triazoloazepines-based |                                                                                     |                                                                                     |                                                                                      |                                                                                     |      |

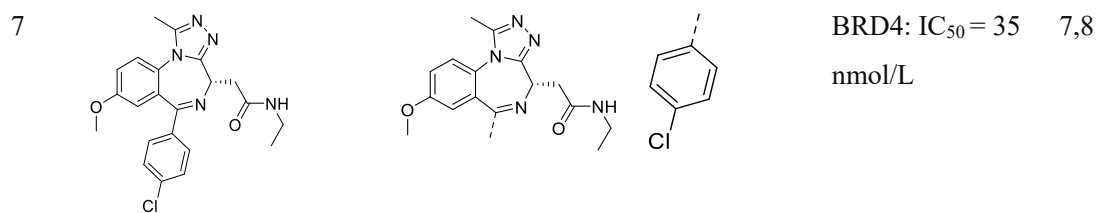

I-BET-762

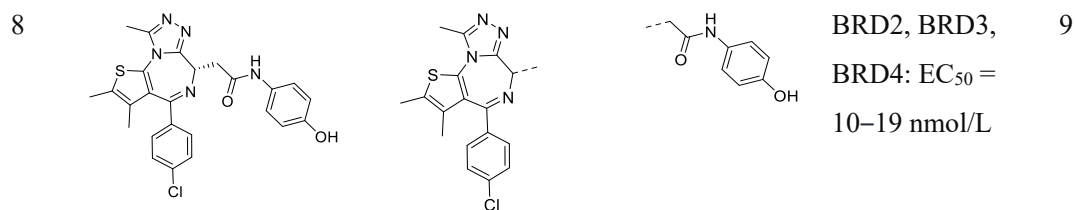

OTX015

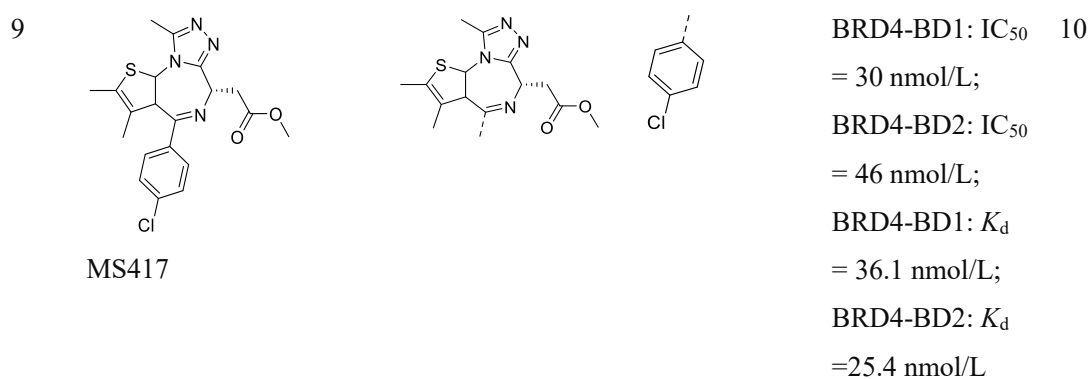

MS417

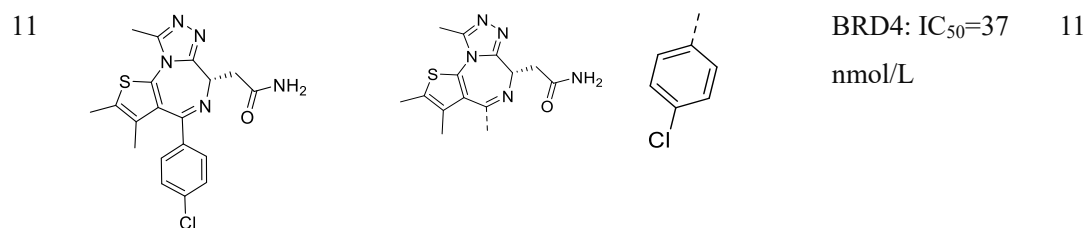

CPI-203

Type 3: isoxazole-based

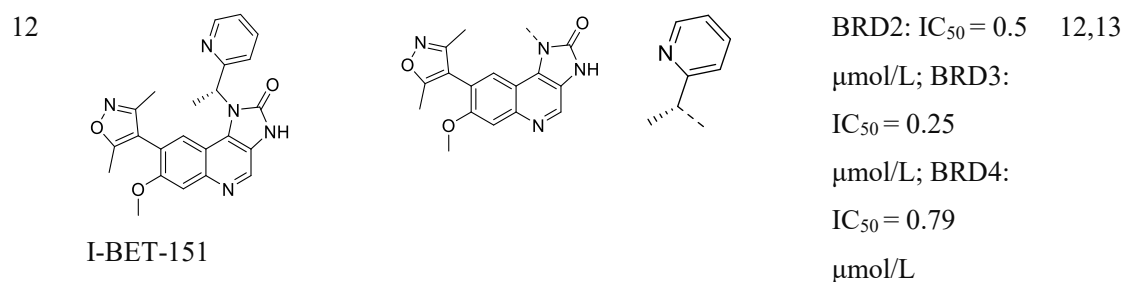

I-BET-151

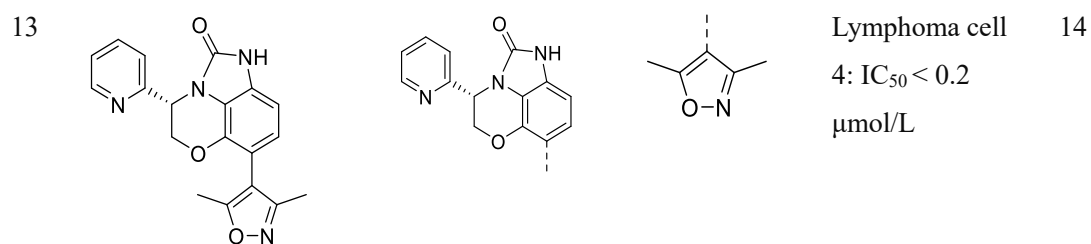

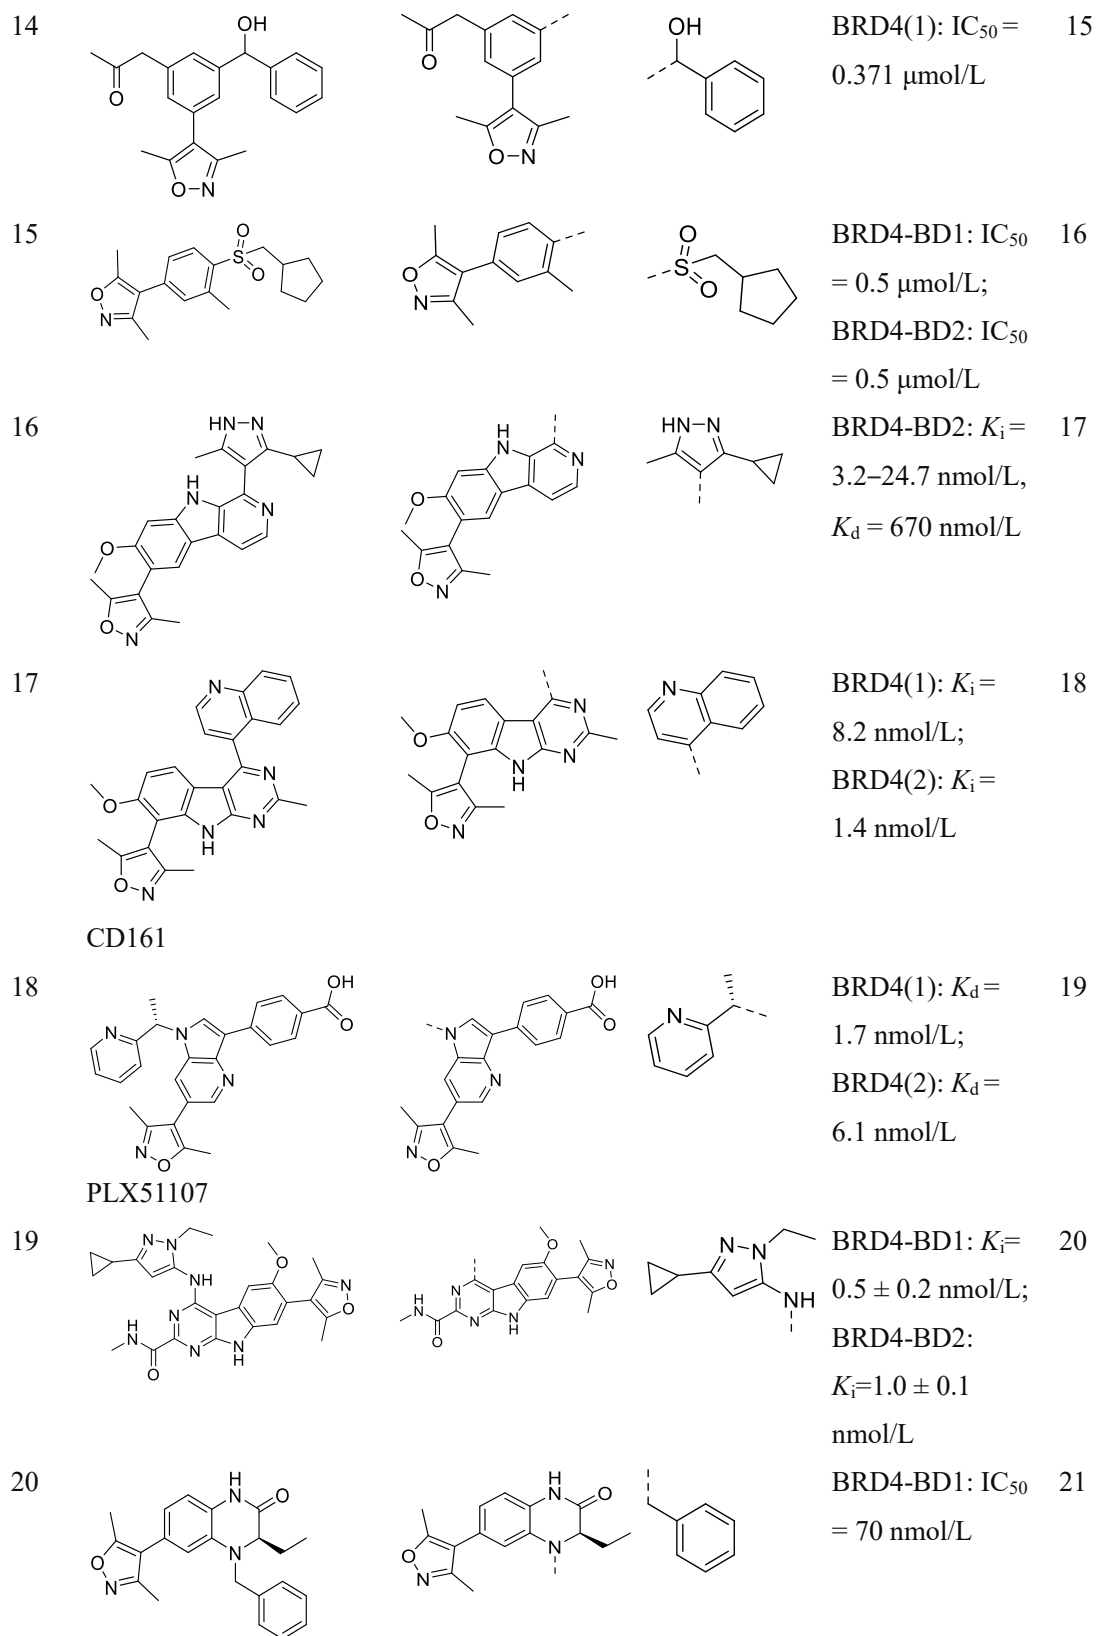



|    |                                                                                     |                                                                                     |                                                                                     |                                                                                                                                                                                      |
|----|-------------------------------------------------------------------------------------|-------------------------------------------------------------------------------------|-------------------------------------------------------------------------------------|--------------------------------------------------------------------------------------------------------------------------------------------------------------------------------------|
| 21 | 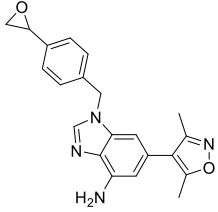   |    |    | BRD4(BD1): 21<br>IC <sub>50</sub> =0.03 μmol/L;<br>BRD4(BD2):<br>IC <sub>50</sub> =0.05 μmol/L;<br>BRD4: IC <sub>50</sub> = 0.06<br>μmol/L                                           |
|    | ZEN-3411                                                                            |                                                                                     |                                                                                     |                                                                                                                                                                                      |
| 22 |    |    |    | BRD4-BD1: 22<br>IC <sub>50</sub> =82 nmol/L;<br>C4-2B cell:<br>IC <sub>50</sub> =0.84<br>μmol/L                                                                                      |
| 23 |    |    |    | BRD4(1): K <sub>d</sub> = 22<br>81 nmol/L                                                                                                                                            |
|    | Y06137                                                                              |                                                                                     |                                                                                     |                                                                                                                                                                                      |
| 24 |   |   |   | BRD4(BD1): K <sub>d</sub> 22<br>= 82 nmol/L                                                                                                                                          |
|    | Y06036                                                                              |                                                                                     |                                                                                     |                                                                                                                                                                                      |
| 25 |  |  |  | BRD4-BD1: 23<br>IC <sub>50</sub> =0.16 μmol/L<br>BRD4-BD2:<br>IC <sub>50</sub> =0.13 μmol/L                                                                                          |
|    | ZEN-3862                                                                            |                                                                                     |                                                                                     |                                                                                                                                                                                      |
| 26 |  |  |  | BRD4: IC <sub>50</sub> < 1 24<br>μmol/L                                                                                                                                              |
|    | BET-IN-4                                                                            |                                                                                     |                                                                                     |                                                                                                                                                                                      |
| 27 |  |  |  | BRD4(BD1): K <sub>i</sub> 25<br>< 1 nmol/L;<br>BRD4(BD1):<br>IC <sub>50</sub> = 2 nmol/L;<br>BRD4(BD1): K <sub>d</sub><br>= 2.2 nmol/L;<br>BRD4(BD2): K <sub>d</sub><br>= 0.8 nmol/L |
|    | CF53                                                                                |                                                                                     |                                                                                     |                                                                                                                                                                                      |

Type 4: pyridines-based

|    |                                                                                     |                                                                                     |                                                                                     |                                                                                                       |
|----|-------------------------------------------------------------------------------------|-------------------------------------------------------------------------------------|-------------------------------------------------------------------------------------|-------------------------------------------------------------------------------------------------------|
| 28 | 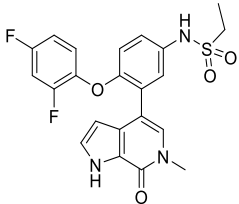   |    |   | BRD2/4/T: $K_i =$ 26<br>1–2.2 nmol/L;<br>BRD3: $K_i =$ 12.2<br>nmol/L                                 |
| 39 |    |    |    | BRD4(BD1): $K_i$ 27<br>= 1.1 nmol/L;<br>BRD4(BD2): $K_i$<br>= 2.1 nmol/L;<br>$EC_{50} =$ 16<br>nmol/L |
| 30 |    |    |    | BRD4: $K_i =$ 8.9<br>nmol/L; MX-1: 28<br>$EC_{50} =$ 33<br>nmol/L                                     |
| 31 |   |   |   | BRD4(1): 29<br>$IC_{50} =$ 12 nmol/L                                                                  |
| 32 |  |  |  | BRD4: $K_i =$ 13 30<br>nmol/L; MX-1:<br>$EC_{50} =$ 47<br>nmol/L                                      |
| 33 |  |  |  | BRD4(1): $IC_{50} =$ 31<br>2.0 nmol/L;<br>MV4-11: $EC_{50} =$<br>8.0 nmol/L                           |
| 34 |  |  |  | CBP: $IC_{50} =$ 1 32<br>nmol/L;<br>BRD4(1): $IC_{50} =$<br>3.1 $\mu$ mol/L                           |
| 35 |  |  |  | BRD4(BD1): 33<br>$IC_{50} =$ 8 nmol/L                                                                 |

GNE-207

BRD4 Inhibitor-10

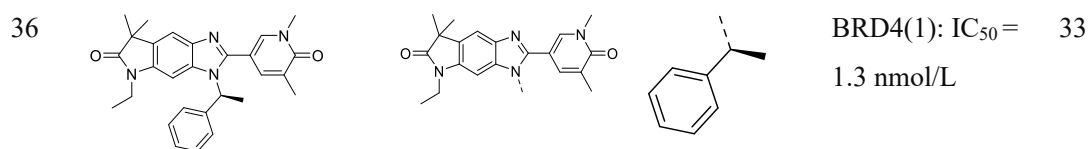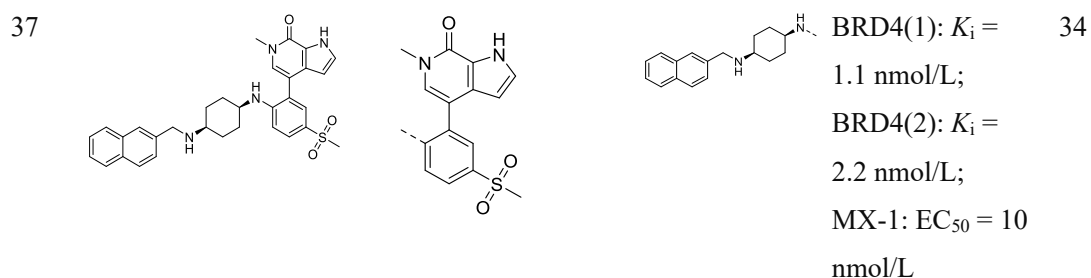

Type 5: quinolines-based

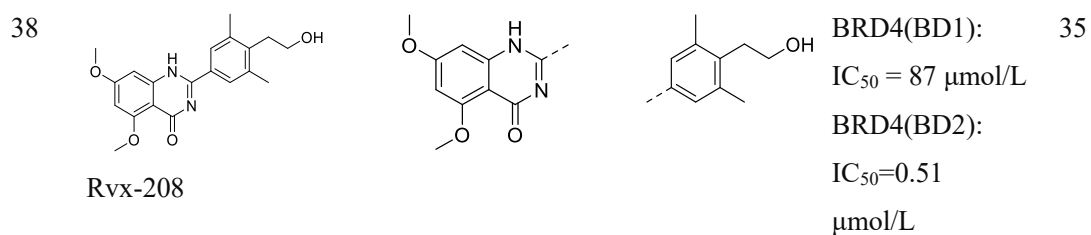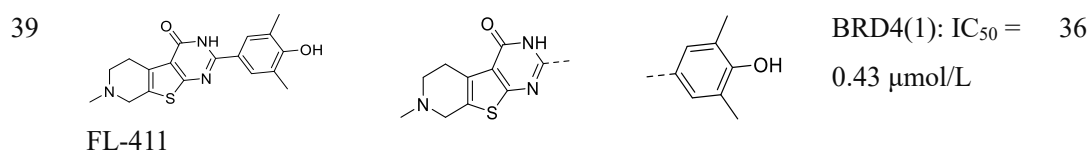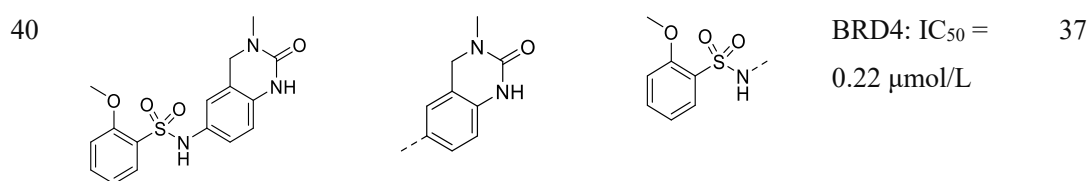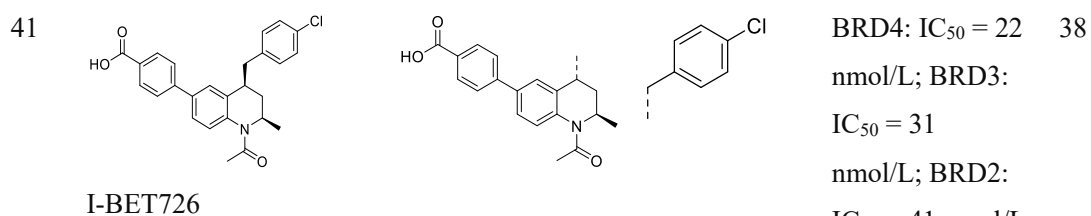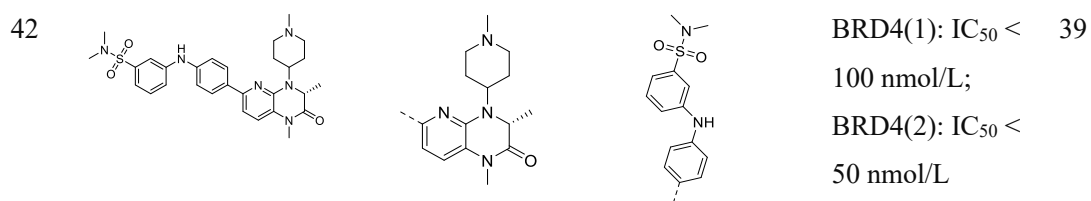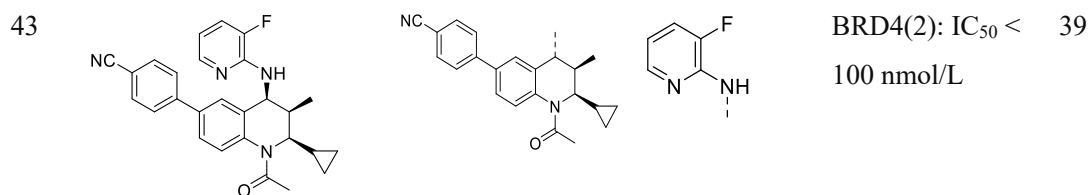

|    |                                                                                               |                                                                                     |                                                                                      |                                                                                          |
|----|-----------------------------------------------------------------------------------------------|-------------------------------------------------------------------------------------|--------------------------------------------------------------------------------------|------------------------------------------------------------------------------------------|
| 44 | 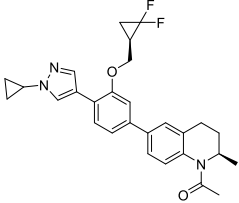             |    |    | BRD4(1): IC <sub>50</sub> = 40<br>20 nmol/L;<br>BRD4(2): IC <sub>50</sub> =<br>45 nmol/L |
| 45 | <br>ABBV-075 |    |     | BET: IC <sub>50</sub> = 1.5 41<br>nmol/L                                                 |
| 46 |              |    |    | BRD4(BD1): 42<br>IC <sub>50</sub> = 1 nmol/L                                             |
| 47 | <br>Bi-2536 |   |   | PLK1: IC <sub>50</sub> = 43<br>0.83 nmol/L;<br>BRD4: IC <sub>50</sub> = 25<br>nmol/L     |
| 48 |            |  |  | BRD4(BD1): 44<br>IC <sub>50</sub> = 1 nmol/L                                             |
| 49 |            |  |  | BRD4(BD1): 45<br>IC <sub>50</sub> = 3 nmol/L                                             |

Type 6: triazolopyridine-based

|                                     |                                                                                     |                                                                                     |                                                                                      |                                                                      |    |
|-------------------------------------|-------------------------------------------------------------------------------------|-------------------------------------------------------------------------------------|--------------------------------------------------------------------------------------|----------------------------------------------------------------------|----|
| 50                                  | 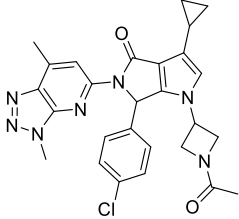   |    |    | BRD4: $IC_{50} < 11$ nmol/L;<br>MV4-11: $GI_{50} = 0.1$ nmol/L       | 46 |
| 51                                  |    |    |    | BRD4: $IC_{50} = 1.7$ nmol/L                                         | 47 |
| 52                                  |    |    |    | BRD2: $IC_{50} = 410$ nmol/L;<br>BRD4: $IC_{50} = 290$ nmol/L        | 48 |
| <b>Bromosporine</b>                 |                                                                                     |                                                                                     |                                                                                      |                                                                      |    |
| 53                                  |    |    |    | BRD4(BD1): $IC_{50} = 27$ nmol/L<br>BRD4(BD2): $IC_{50} = 32$ nmol/L | 49 |
| <b>diazene</b>                      |                                                                                     |                                                                                     |                                                                                      |                                                                      |    |
| 54                                  |  |  |  | BRD4: $K_i = 30-50$ nmol/L                                           | 50 |
| <b>MS436</b>                        |                                                                                     |                                                                                     |                                                                                      |                                                                      |    |
| 55                                  |  |  |  | BRD4(BD1): $IC_{50} = 49$ nmol/L<br>BRD4(BD2): $IC_{50} = 32$ nmol/L | 51 |
| <b>ZL0454</b>                       |                                                                                     |                                                                                     |                                                                                      |                                                                      |    |
| <b>Type 7: 4-acyl pyrrole-based</b> |                                                                                     |                                                                                     |                                                                                      |                                                                      |    |
| 56                                  |  |  |  | BRD4(BD1): $IC_{50} = 15$ nmol/L<br>BRD4(BD2): $IC_{50} = 43$ nmol/L | 52 |
| 57                                  |  |  |  | BRD4(1): $K_d = 237$ nmol/L                                          | 53 |

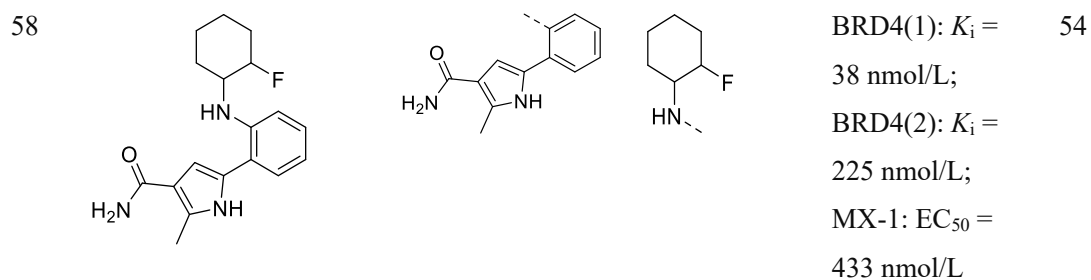

Type 8: 2-thiazolidinone-based

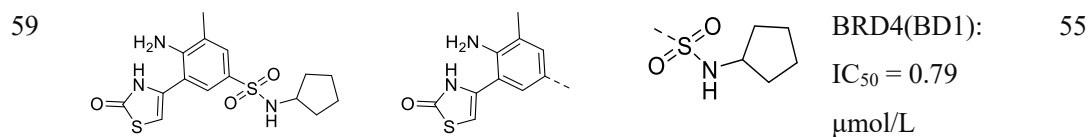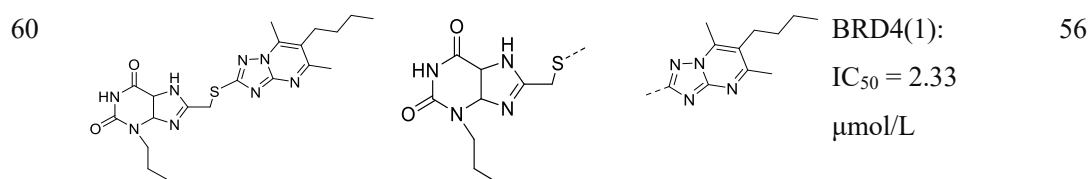

Others

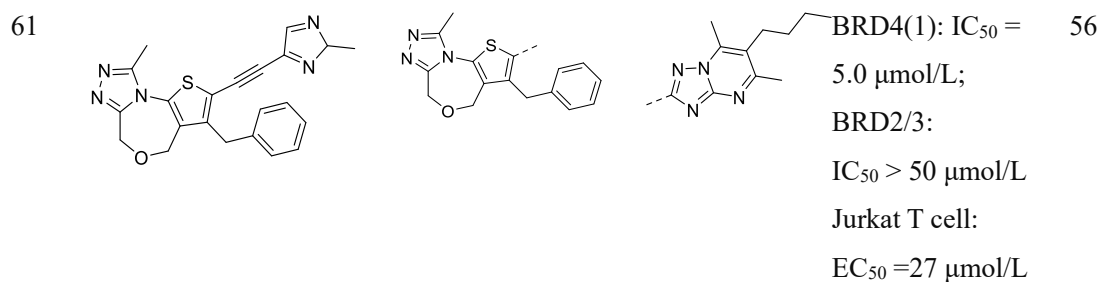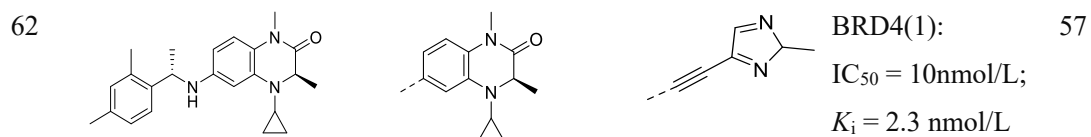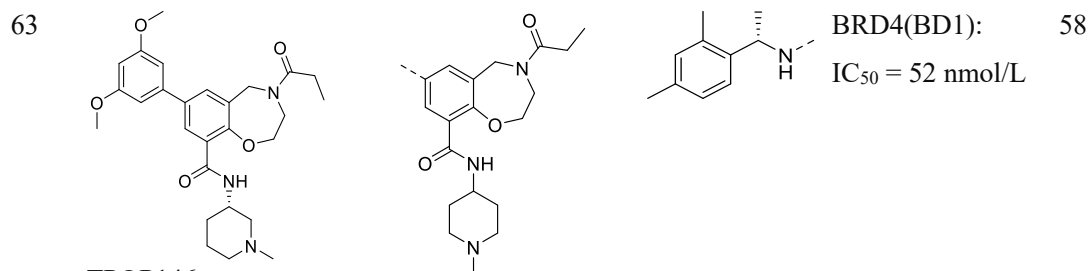

TPOP146

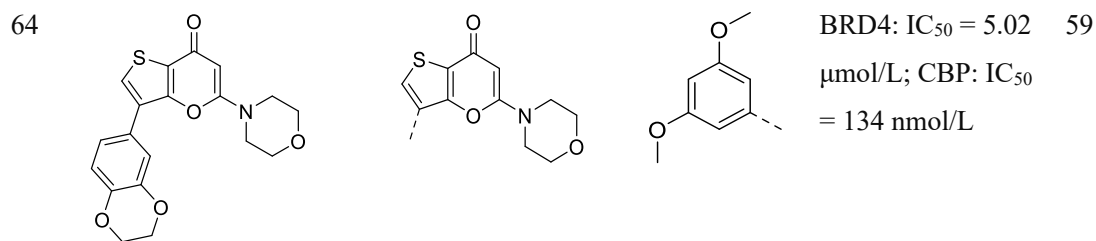

SF2523

|    |                                                                                     |                                                                                     |                                                                                      |                                                                                                                                                                                                    |    |
|----|-------------------------------------------------------------------------------------|-------------------------------------------------------------------------------------|--------------------------------------------------------------------------------------|----------------------------------------------------------------------------------------------------------------------------------------------------------------------------------------------------|----|
| 65 | 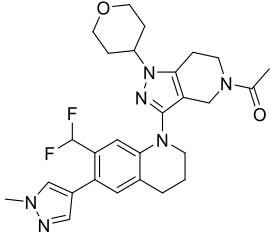   |    |     | PI3K $\alpha$ : IC <sub>50</sub> = 34<br>nmol/L; PI3K $\gamma$ :<br>IC <sub>50</sub> = 158<br>nmol/L;<br>BRD4(BD1):<br>IC <sub>50</sub> = 241<br>nmol/L; mTOR:<br>IC <sub>50</sub> = 280<br>nmol/L | 60 |
| 66 |    |    |    | BRD4(BD1):<br>IC <sub>50</sub> = 4.2<br>$\mu$ mol/L; BRET:<br>IC <sub>50</sub> = 12 nmol/L                                                                                                         | 61 |
| 67 |    |    |    | BRD4: IC <sub>50</sub> = 13<br>$\mu$ mol/L; EP300:<br>IC <sub>50</sub> = 0.03<br>$\mu$ mol/L                                                                                                       | 62 |
| 68 |  |  |  | BRD4(BD1): K <sub>i</sub><br>= 77 nmol/L;<br>BRD4(BD2): K <sub>i</sub><br>= 718 nmol/L                                                                                                             | 63 |
| 69 |  |  |  | BRD4(1): IC <sub>50</sub> =<br>410 nmol/L;<br>BRD4(1): K <sub>d</sub> =<br>130 nmol/L                                                                                                              | 64 |
| 70 |  |  |  | BRD4(1): K <sub>i</sub> =<br>110 nmol/L;<br>BRDT(1): K <sub>i</sub> =<br>200 nmol/L                                                                                                                | 65 |
| 71 |  |  |  | BRD4(1): K <sub>i</sub> =<br>155 nmol/L                                                                                                                                                            | 66 |

GNE-049

BMS-986158

## References

1. Filippakopoulos P, Qi J, Picaud S, Shen Y, Smith WB, Fedorov O, et al. Selective inhibition of BET bromodomains. *Nature* 2010;**468**:1067-73.
2. Albrecht BK, Gehling VS, Hewitt MC, Vaswani RG, Côté A, Leblanc Y, et al. Identification of a benzoisoxazoloazepine inhibitor (CPI-0610) of the bromodomain and extra-terminal (BET) family as a candidate for human clinical trials. *J Med Chem* 2016;**59**:1330–9.
3. Siegel SSB, Cleve A, Haendler B, Fernandez AM, Montalvan U, Krause S, et al. Bicyclo 2,3-benzodiazepines and spirocyclically substituted 2,3-benzodiazepines. WO2014128067 A1, 2014 Aug 28.
4. Schmees NK, Haendler J, Neuhaus B, Lejeune R, Fernandez-Montalvan M, Künzer AE, et al. BET protein-inhibiting 5-aryl triazole azepines. WO2014048945 A1, 2014 Apr 3.
5. Hewitt MC, Leblanc Y, Gehling VS, Vaswani RG, Cote A, Nasveschuk CG, et al. Development of methyl isoxazoleazepines as inhibitors of BET. *Bioorg Med Chem Lett* 2015;**25**:1842–8.
6. Mahe M, Dufour F, Neyret-Kahn H, Moreno-Vega A, Beraud C, Shi M, et al. An FGFR3/MYC positive feedback loop provides new opportunities for targeted therapies in bladder cancers. *EMBO Mol Med* 2018;**10**:4.
7. Nicodeme E, Jeffrey KL, Schaefer U, Beinke S, Dewell S, Chung CW, et al. Suppression of inflammation by a synthetic histone mimic. *Nature* 2010;**468**:1119–23.
8. Asangani IA, Kraut N. Therapeutic targeting of BET bromodomain proteins in castration-resistant prostate cancer. *Nature* 2014;**510**:278–82.
9. Vázquez R, Riveiro ME, Astorgues-Xerri L, Odore E, Rezai K, Erba E, et al. The bromodomain inhibitor OTX015 (MK-8628) exerts anti-tumor activity in triple-negative breast cancer models as single agent and in combination with everolimus. *Oncotarget* 2017;**8**:7598–613.
10. Zhang G, Liu R, Zhong Y, Plotnikov AN, Zhang W, Zeng L, et al. Down-regulation of NF- $\kappa$ B transcriptional activity in HIV-associated kidney disease by BRD4 inhibition. *J Biol Chem* 2012;**287**:28840–51.
11. Devaiah BN, Lewis BA, Cherman N, Hewitt MC, Albrecht BK, Robey PG, et al. BRD4 is an atypical kinase that phosphorylates serine2 of the RNA polymerase II carboxy-terminal domain. *Proc Natl Acad Sci U S A* 2012, **109**:6927–32.



12. Seal J, Lamotte Y, Donche F, Bouillot A, Mirguet O, Gellibert F, et al. Identification of a novel series of BET family bromodomain inhibitors: Binding mode and profile of I-BET151 (GSK1210151A). *Bioorg Med Chem Lett* 2012;**22**:2968–72.
13. Chaidos A, Caputo V, Gouvedenou K, Liu B, Marigo I, Chaudhry MS, et al. Potent antimyeloma activity of the novel bromodomain inhibitors I-BET151 and I-BET762. *Blood* 2014;**123**:697–705.
14. Ali I, Lee J, Go A, Choi G, Lee K. Discovery of novel [1,2,4]triazolo[4,3-*a*]quinoxaline aminophenyl derivatives as BET inhibitors for cancer treatment. *Bioorg Med Chem Lett* 2017;**27**:4606–13.
15. Hewings DS, Fedorov O, Filippakopoulos P, Martin S, Picaud S, Tumber A, et al. Optimization of 3,5-dimethylisoxazole derivatives as potent bromodomain ligands. *J Med Chem* 2013;**56**:3217–27.
16. Bamborough P, Diallo H, Goodacre JD, Gordon L, Lewis A, Seal JT, et al. Fragment-based discovery of bromodomain inhibitors part 2: optimization of phenylisoxazole sulfonamides. *J Med Chem* 2012;**55**:587–96.
17. Ran X, Zhao Y, Liu L, Bai L, Yang CY, Zhou B, et al. Structure-based design of  $\gamma$ -carboline analogues as potent and specific BET bromodomain inhibitors. *J Med Chem* 2015, **58**:4927–39.
18. Wang L, Wu X, Wang R, Yang C, Li Z, Wang C, et al. BRD4 inhibition suppresses cell growth, migration and invasion of salivary adenoid cystic carcinoma. *Biol Res* 2017;**50**:19.
19. Ozer HG, El-Gamal D, Powell B, Hing ZA, Blachly JS, Harrington B, et al. BRD4 profiling identifies critical chronic lymphocytic leukemia oncogenic circuits and reveals sensitivity to PLX51107, a novel structurally distinct BET inhibitor. *Cancer Discov* 2018;**8**:458–77.
20. Zhou B, Hu J, Xu F, Chen Z, Bai L, Fernandez-Salas E, et al. Discovery of a small-molecule degrader of bromodomain and extra-terminal (BET) proteins with picomolar cellular potencies and capable of achieving tumor regression. *J Med Chem* 2018;**61**:462–81.
21. Yang Y, Zhao L, Xu B, Yang L, Zhang J, Zhang H, et al. Design, synthesis and biological evaluation of dihydroquinoxalinone derivatives as BRD4 inhibitors. *Bioorg Chem* 2016;**68**:236–44.

22. Zhang M, Zhang Y, Song M, Xue X, Wang J, Wang C, et al. Structure-based discovery and optimization of benzo[*d*]isoxazole derivatives as potent and selective BET inhibitors for potential treatment of castration-resistant prostate cancer (CRPC). *J Med Chem* 2018;**61**:3037–58.
23. Kharenko OA, Patel RG, Brown SD, Calosing C, White A, Lakshminarasimhan D, et al. Design and characterization of novel covalent bromodomain and extra-terminal domain (BET) inhibitors targeting a methionine. *J Med Chem* 2018;**61**:8202–11.
24. Xue X, Zhang Y, Wang C, Zhang M, Xiang Q, Wang J, et al. Benzoxazinone-containing 3,5-dimethylisoxazole derivatives as BET bromodomain inhibitors for treatment of castration-resistant prostate cancer. *Eur J Med Chem* 2018;**152**:542–59.
25. Zhao Y, Zhou B, Bai L, Liu L, Yang CY, Meagher JL, et al. Structure-based discovery of CF53 as a potent and orally bioavailable bromodomain and extra-terminal (BET) bromodomain inhibitor. *J Med Chem* 2018;**61**:6110–20.
26. Bui MH, Lin X, Albert DH, Li L, Lam LT, Faivre EJ, et al. Preclinical characterization of BET family bromodomain inhibitor ABBV-075 suggests combination therapeutic strategies. *Cancer Res* 2017;**77**: 2976–89.
27. Liu D, Pratt J, Wang L, Hasvold LA, Bogdan A. Bromodomain inhibitors. US20140256710, 2014 Feb 9.
28. Wang L, Pratt JK, Soltwedel T, Sheppard GS, Fidanze SD, Liu D, et al. Fragment-based, structure-enabled discovery of novel pyridones and pyridone macrocycles as potent bromodomain and extra-terminal domain (BET) family bromodomain inhibitors. *J Med Chem* 2017;**60**:3828–50.
29. Engelhardt HM, Smethurst L, Pyridinones C. WO2015022332 A1, 2015 Feb 19.
30. Vadivelu S, Rajagopal S.; Chinnapattu M, Gondrala PK, Sivanandhan D, Mulakala, C. Tricyclic fused derivatives of 1-(cyclo) alkyl pyridin-2-one useful for the treatment of cancer. WO2016157221 A1, 2016 Oct 6.
31. Liu DP, Wang J, Hasvold L, Bogdan ALA. Bromodomain inhibitors. US20140256710, 2014 Feb 8.
32. Lai KW, Romero FA, Tsui V, Beresini MH, de Leon Boenig G, Bronner SM, et al. Design and synthesis of a biaryl series as inhibitors for the bromodomains of CBP/P300. *Med Chem Lett* 2018;**28**:15–23.

33. Duan Y, Guan Y, Qin W, Zhai X, Yu B, Liu H. Targeting Brd4 for cancer therapy: inhibitors and degraders. *Medchemcomm* 2018;**9**:1779–802.
34. Engelhardt H. Benzimidazole derivatives. WO2015169962 A1, 2015 Nov 12.
35. Picaud S, Wells C, Felletar I, Brotherton D, Martin S, Savitsky P, et al. RVX-208, an inhibitor of BET transcriptional regulators with selectivity for the second bromodomain. *Proc Natl Acad Sci U S A* 2013;**110**:19754–9.
36. Ouyang L, Zhang L, Liu J, Fu L, Yao D, Zhao Y, et al. Discovery of a small-molecule bromodomain-containing protein 4 (BRD4) inhibitor that induces AMP-activated protein kinase-modulated autophagy-associated cell death in breast cancer. *J Med Chem* 2017;**60**:9990–10012.
37. Fish PV, Filippakopoulos P, Bish G, Brennan PE, Bunnage ME, Cook AS, et al. Identification of a chemical probe for bromo and extra C-terminal bromodomain inhibition through optimization of a fragment-derived hit. *J Med Chem* 2012;**55**:9831–7.
38. Gosmini R, Nguyen VL, Toum J, Simon C, Brusq JM, Krysa G, et al. The discovery of I-BET726 (GSK1324726A), a potent tetrahydroquinoline ApoA1 up-regulator and selective BET bromodomain inhibitor. *J Med Chem* 2014;**57**:8111–31.
39. Bair KWH, Kauffman T, Kayser-Bricker GS, Luke KJ, Martin GP, Millan MW, et al. Tetrahydroquinoline composition as BET bromodomain inhibitors. WO2015074064 A1, 2015 Jul 9.
40. Schmees NH, Stockigt B, Gallenkamp D, Bissell D, Bouglas RA. Modified BET-protein-inhibiting dihydroquinolones and dihydropyridopyrazinones. WO2015004075 A1, 2015 Jan 15.
41. Faivre EJ, Wilcox D, Lin X, Hessler P, Torrent M, He W, et al. Exploitation of castration-resistant prostate cancer transcription factor dependencies by the novel BET inhibitor ABBV-075. *Mol Cancer Res* 2017;**15**:35–44.
42. Engelhardt HG, Smethurst, DC. Substituted [1,2,4]triazolo[4,3-*a*]pyrazines as BRD4 inhibitors. US20160129001, 2016 May 12.
43. Chen L, Yap JL, Yoshioka M, Lanning ME, Fountain RN, Raje M, et al. BRD4 structure–activity relationships of dual PLK1 kinase/BRD4 bromodomain inhibitor BI-2536. *ACS Med Chem Lett* 2015;**6**:764–9.
44. Duan Y, Guan Y, Qin W, Zhai X, Yu B, Liu H. Targeting Brd4 for cancer therapy: inhibitors and degraders. *Medchemcomm*. 2018;**9**:1779–802.

45. Engelhardt H, Gianni D, Smethurst C. Substituted [1,2,4]triazolo[4,3-*a*]pyrazines as BRD4 inhibitors. US20160129001 A1, 2016 Jul 7.
46. Blank J, Bold G, Bordas V, Cotesta S, Guagnano V, Rueger H, et al. Pyrrolopyrrolone derivatives and their use as BET inhibitors. WO2015075665 A1, 2015 May 28.
47. Rhyasen GW, Hattersley MM, Yao Y, Dulak A, Wang W, Petteruti P, et al. AZD5153: a novel bivalent BET bromodomain inhibitor highly active against hematologic malignancies. *Mol Cancer Ther* 2016;**15**:2563–74.
48. Pan H, Lu P, Shen Y, Wang Y, Jiang Z, Yang X, et al. The bromodomain and extraterminal domain inhibitor bromosporine synergistically reactivates latent HIV-1 in latently infected cells. *Oncotarget* 2017;**8**:94104–16.
49. Liu Z, Tian B, Chen H, Wang P, Brasier AR, Zhou J. Discovery of potent and selective BRD4 inhibitors capable of blocking TLR3-induced acute airway inflammation. *Eur J Med Chem* 2018;**151**:450–61.
50. Zhang G, Plotnikov AN, Rusinova E, Shen T, Morohashi K, Joshua J, et al. Structure-guided design of potent diazobenzene inhibitors for the BET bromodomains. *J Med Chem* 2013;**56**:9251–64.
51. Hasvold LAL, Park D, Pratt CH, Sheppard JK, GS Wang, L. Isoindolinone derivative. WO2013158952 A1, 2013 Oct 24.
52. Hugle M, Lucas X, Weitzel G, Ostrovskiy D, Breit B, Gerhardt S, et al. 4-Acyl pyrrole derivatives yield novel vectors for designing inhibitors of the acetyl-lysine recognition site of BRD4(1). *J Med Chem* 2016;**59**:1518–30.
53. Hasvold LA, Pratt JK, Mcdaniel KF, Sheppard GS, Liu D, Elmore SW, et al. *Pyrrole amide inhibitors*. US20140275079 A1, 2014 Feb 15.
54. Zhao L, Cao D, Chen T, Wang Y, Miao Z, Xu Y, et al. Fragment-based drug discovery of 2-thiazolidinones as inhibitors of the histone reader BRD4 bromodomain. *J Med Chem* 2013;**56**:3833–51.
55. Raux B, Voitovich Y, Derviaux C, Lugari A, Rebuffet E, Milhas S, et al. Exploring selective inhibition of the first bromodomain of the human bromodomain and extra-terminal domain (BET) proteins. *J Med Chem* 2016;**59**:1634–41.
56. Liu J, Duan Z, Guo W, Zeng L, Wu Y, Chen Y, et al. Targeting the BRD4/FOXO3a/CDK6 axis sensitizes AKT inhibition in luminal breast cancer. *Nat Commun* 2018;**9**:5200.

57. Hu J, Wang Y, Li Y, Xu L, Cao D, Song S, et al. Discovery of a series of dihydroquinoxalin-2(1*H*)-ones as selective BET inhibitors from a dual PLK1-BRD4 inhibitor. *Eur J Med Chem*. 2017;**137**:176–95.
58. Popp TA, Tallant C, Rogers C, Fedorov O, Brennan PE, Müller S, et al. Development of selective CBP/P300 benzoxazepine bromodomain inhibitors. *J Med Chem* 2016;**59**:88.
59. Andrews FH, Singh AR, Joshi S, Smith CA, Morales GA, Garlich JR, et al. Dual-activity PI3K-BRD4 inhibitor for the orthogonal inhibition of MYC to block tumor growth and metastasis. *Proc Natl Acad Sci U S A* 2017;**114**: E1072–80.
60. Romero FA, Murray J, Lai KW, Tsui V, Albrecht BK, An L, et al. GNE-781, A highly advanced potent and selective bromodomain inhibitor of cyclic adenosine monophosphate response element binding protein, binding protein (CBP). *J Med Chem* 2017;**60**:9162–83.
61. Crawford TD, Romero FA, Lai KW, Tsui V, Taylor AM, de Leon Boenig G, et al. Discovery of a potent and selective *in vivo* probe (GNE-272) for the bromodomains of CBP/EP300. *J Med Chem* 2016;**59**:10549–63.
62. Cheung K, Lu G, Sharma R, Vincek A, Zhang R, Plotnikov AN, et al. BET N-terminal bromodomain inhibition selectively blocks Th17 cell differentiation and ameliorates colitis in mice. *Proc Natl Acad Sci U S A* 2017;**114**:2952–7.
63. Xue X, Zhang Y, Liu Z, Song M, Xing Y, Xiang Q, et al. Discovery of Benzo[*cd*]indol-2(1*H*)-ones as potent and specific BET bromodomain inhibitors: structure-based virtual screening, optimization, and biological evaluation. *J Med Chem* 2016;**59**:1565–79.
64. Ayoub AM, Hawk LML, Herzig RJ, Jiang J, Wisniewski AJ, Gee CT, et al. BET bromodomain inhibitors with one-step synthesis discovered from virtual screen. *J Med Chem* 2017;**60**:4805–17.
65. von Schaper E. Roche bets on bromodomains. *Nat Biotechnol* 2016;**34**:361–2.
66. Xiang Q, Zhang Y, Li J, Xue X, Wang C, Song M, et al. Y08060: A Selective BET inhibitor for treatment of prostate cancer. *ACS Med Chem Lett* 2018;**9**: 262–7.

## 2. NMR spectra

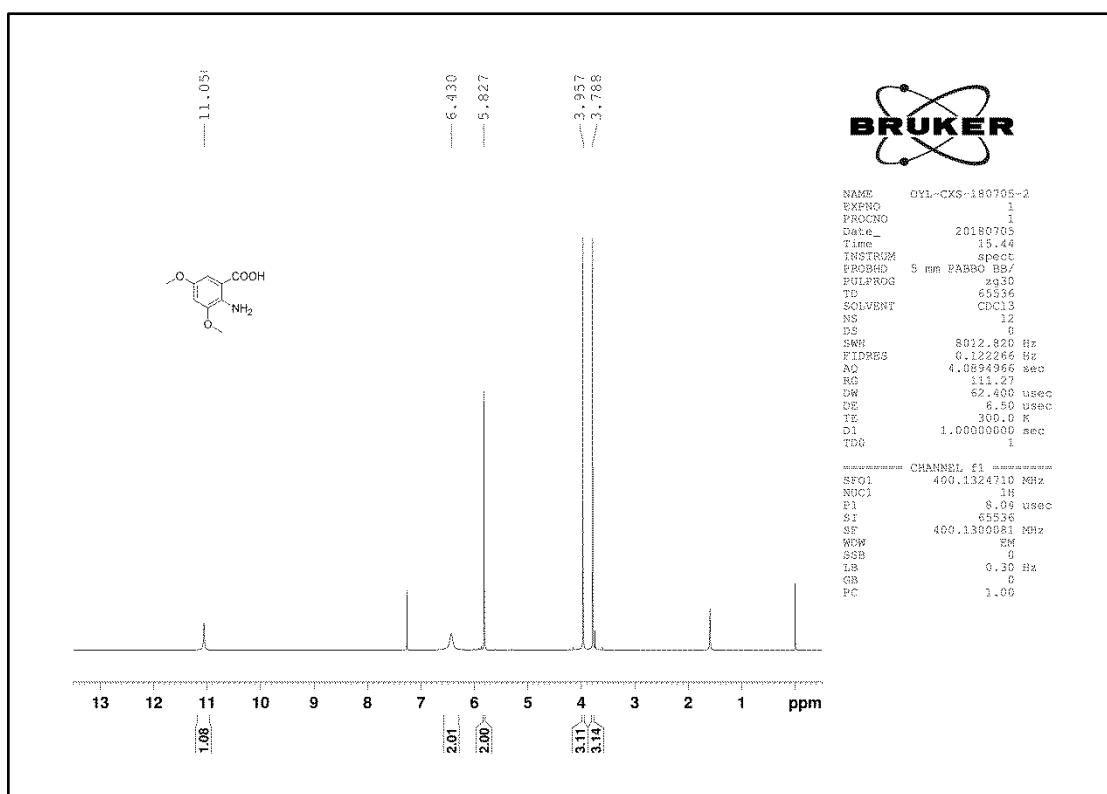

<sup>1</sup>H NMR Spectrum of Compound **3a**

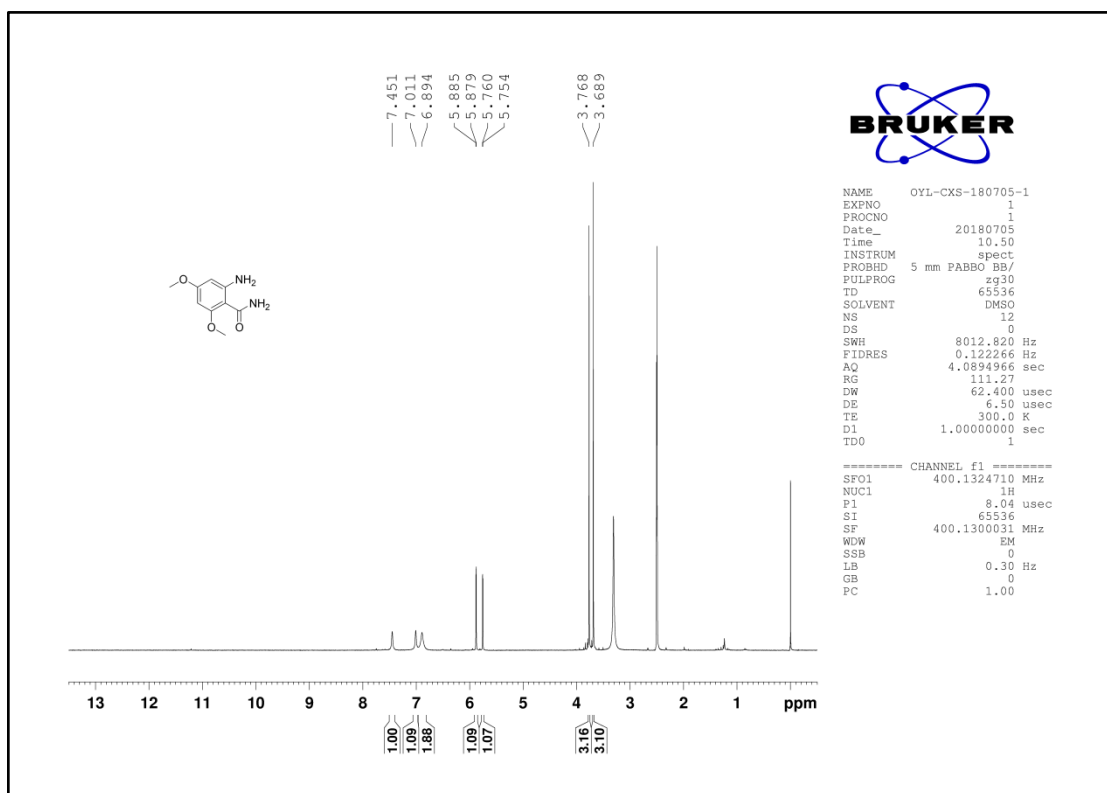

<sup>1</sup>H NMR Spectrum of Compound **4a**

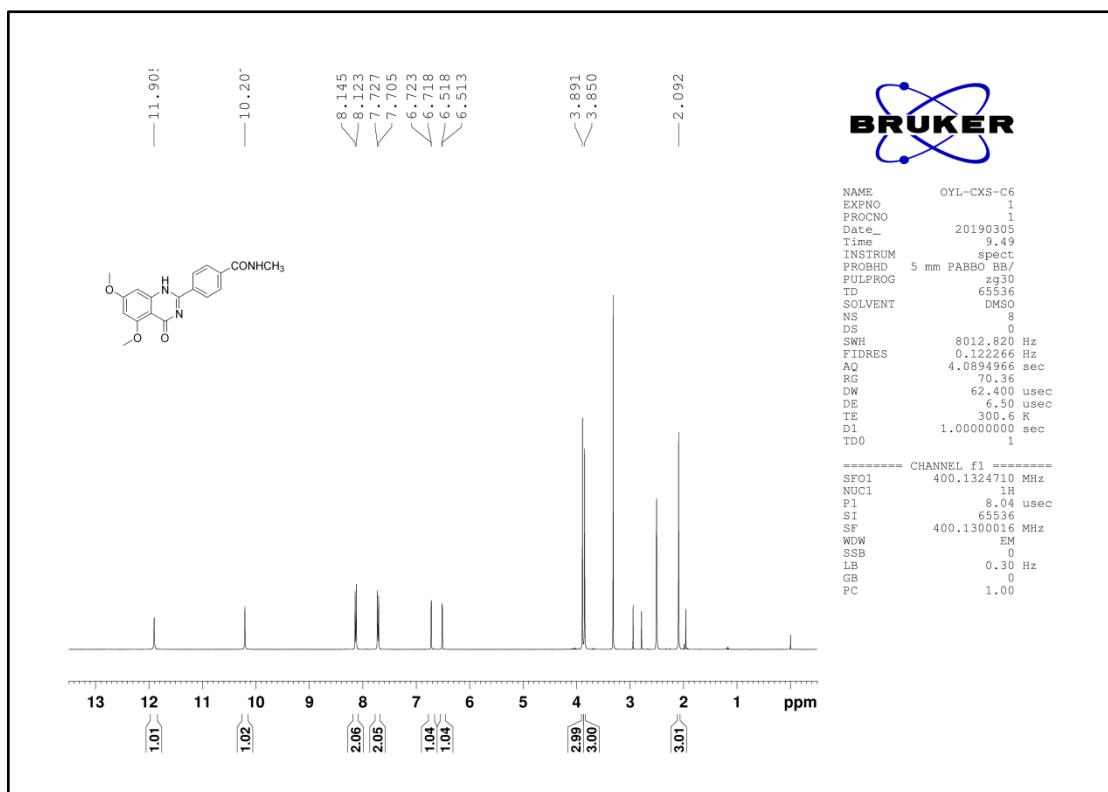

<sup>1</sup>H NMR Spectrum of Compound 5a

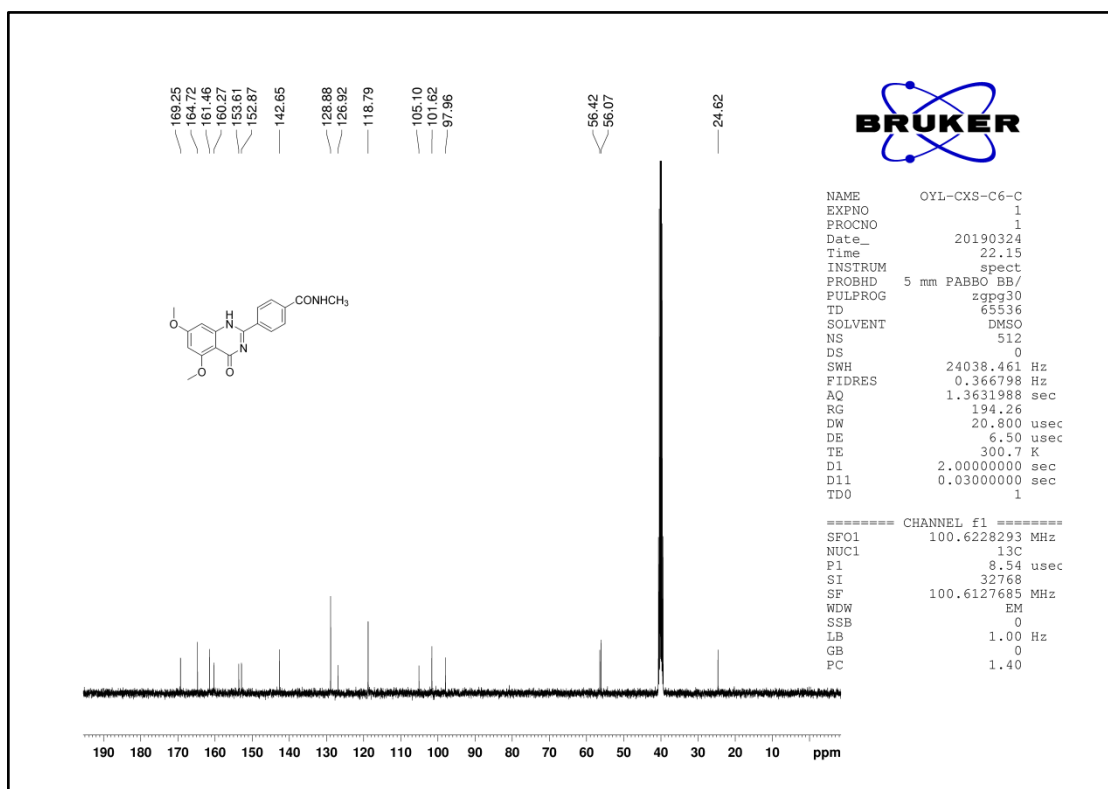

<sup>13</sup>C NMR Spectrum of Compound 5a

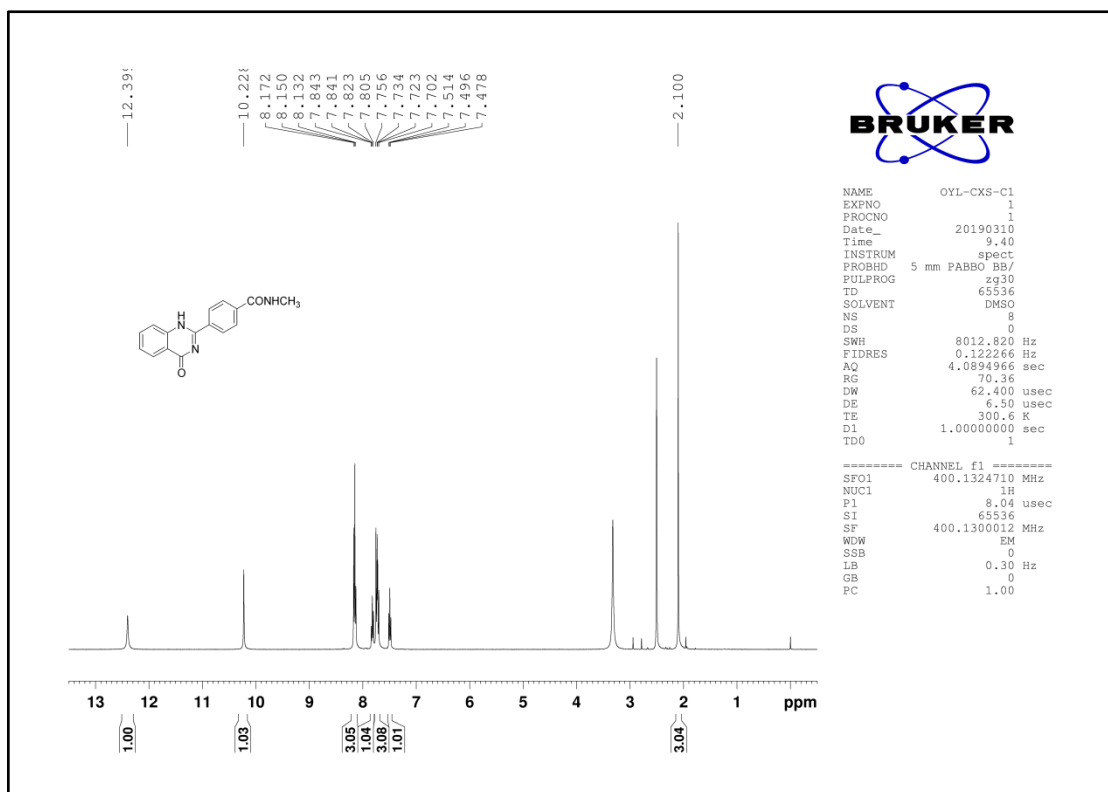

<sup>1</sup>H NMR Spectrum of Compound **5b**

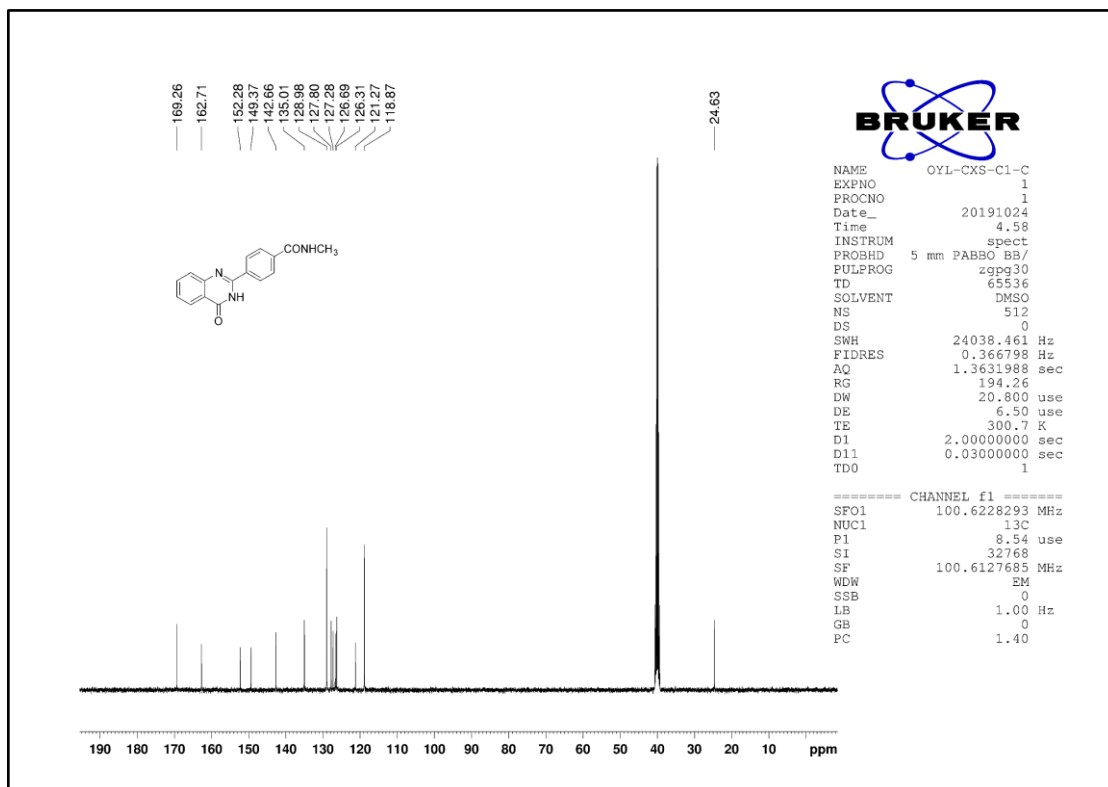

<sup>13</sup>C NMR Spectrum of Compound **5b**



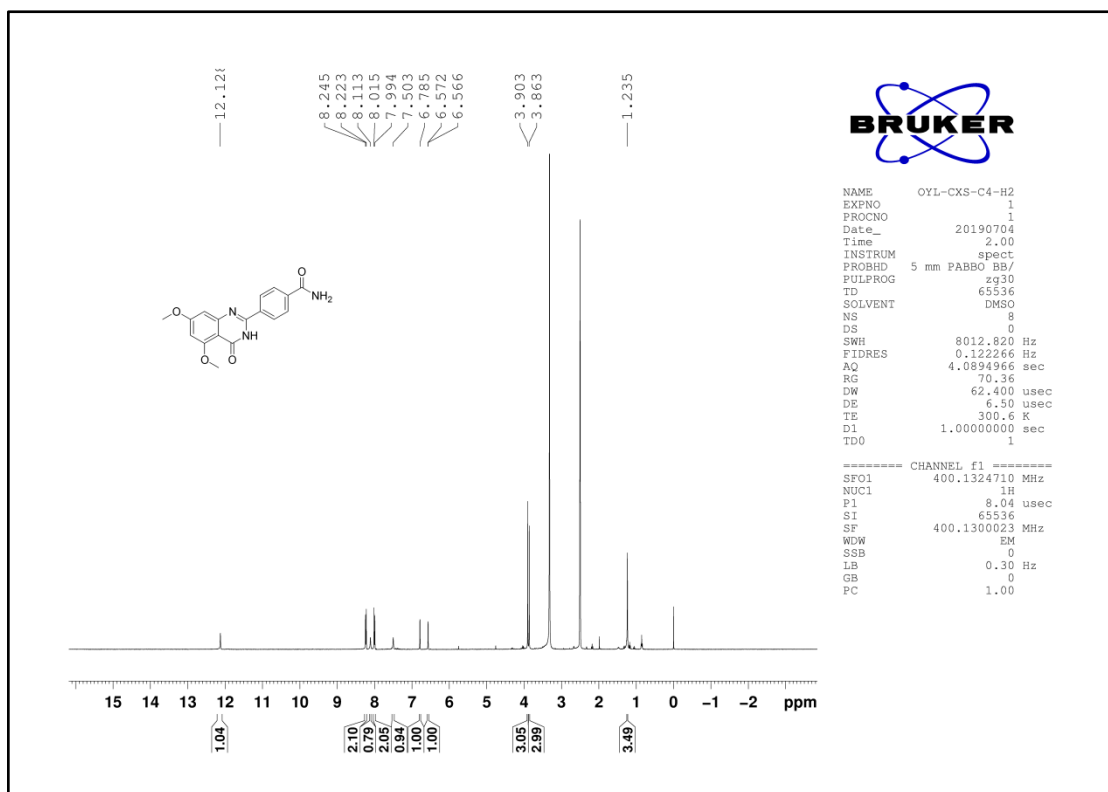

<sup>1</sup>H NMR Spectrum of Compound 5c

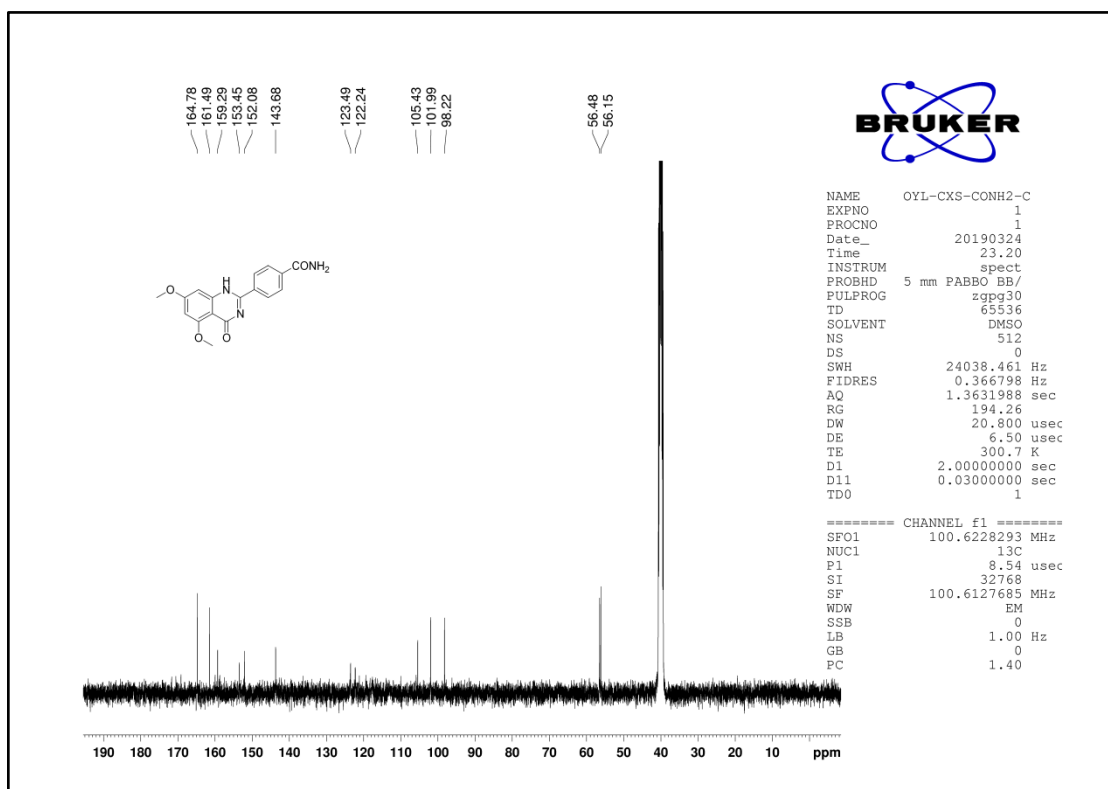

<sup>13</sup>C NMR Spectrum of Compound 5c

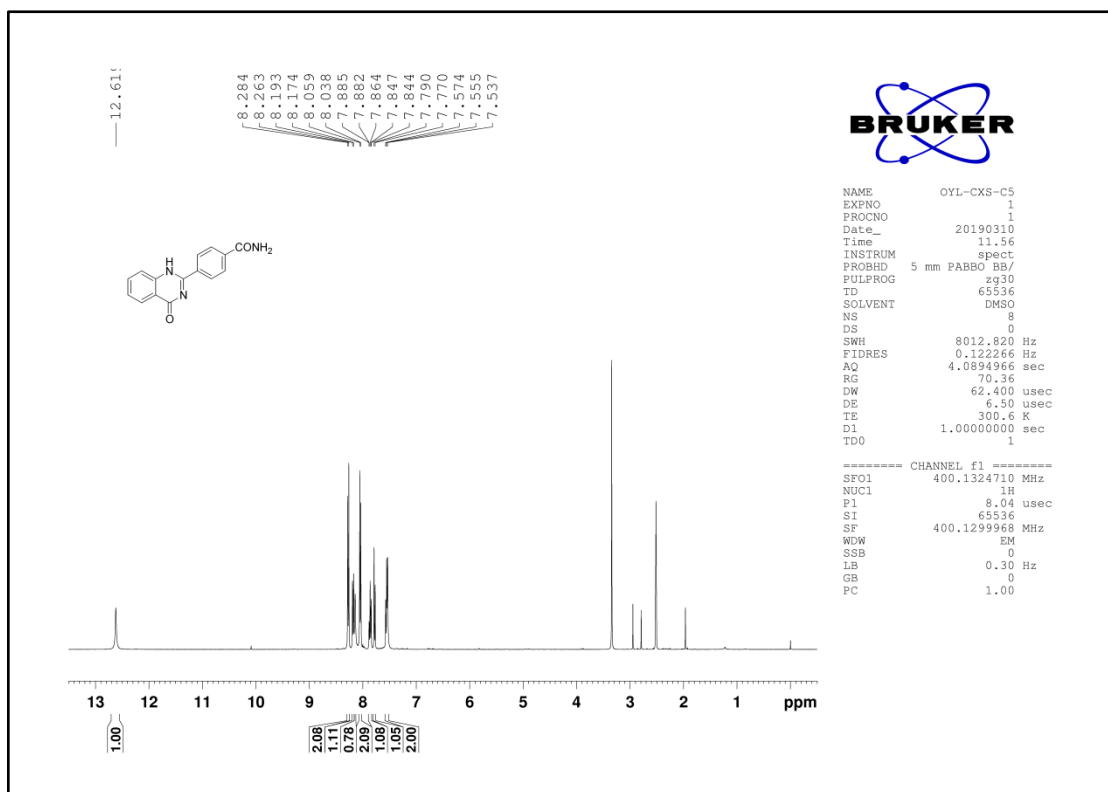

<sup>1</sup>H NMR Spectrum of Compound 5d

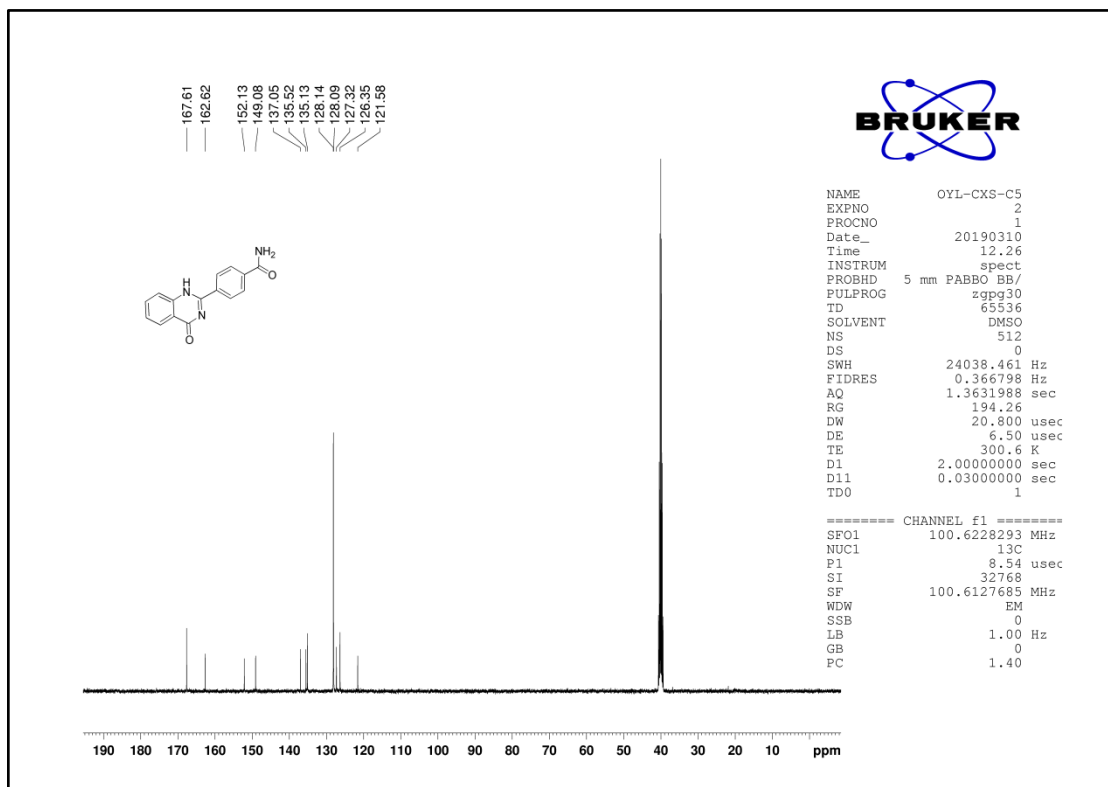

<sup>13</sup>C NMR Spectrum of Compound 5d

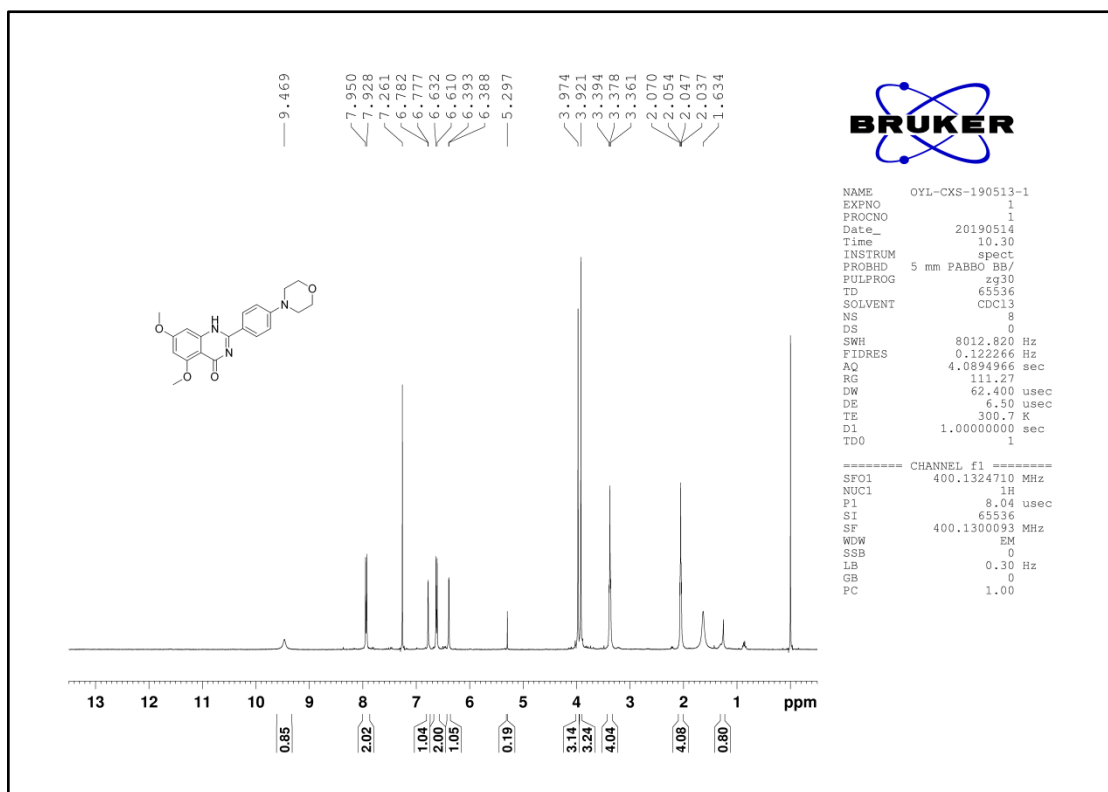

<sup>1</sup>H NMR Spectrum of Compound 5e

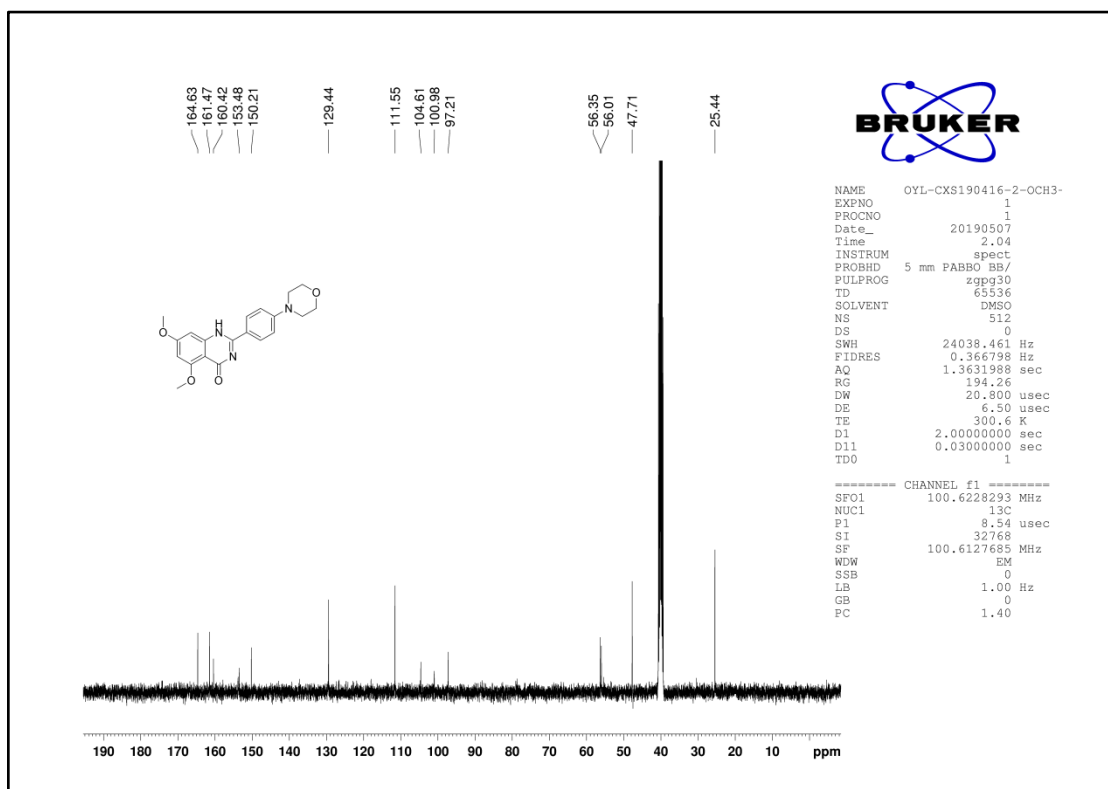

<sup>13</sup>C NMR Spectrum of Compound 5e

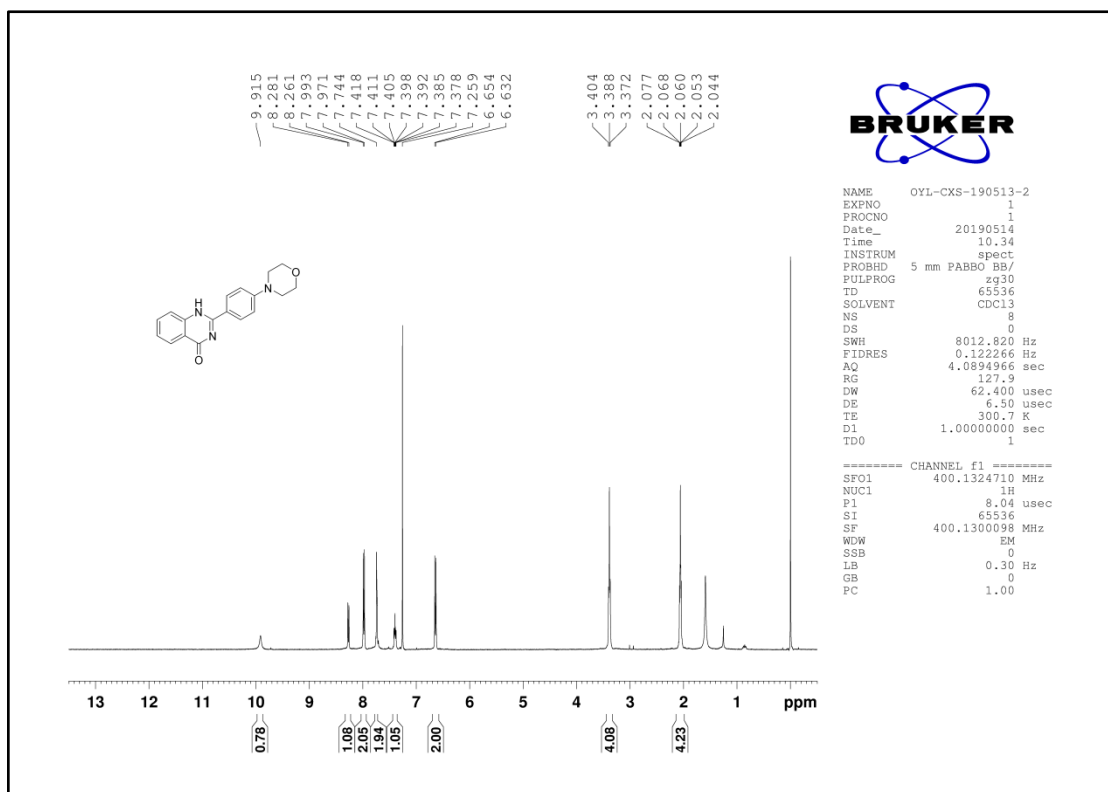

<sup>1</sup>H NMR Spectrum of Compound **5f**

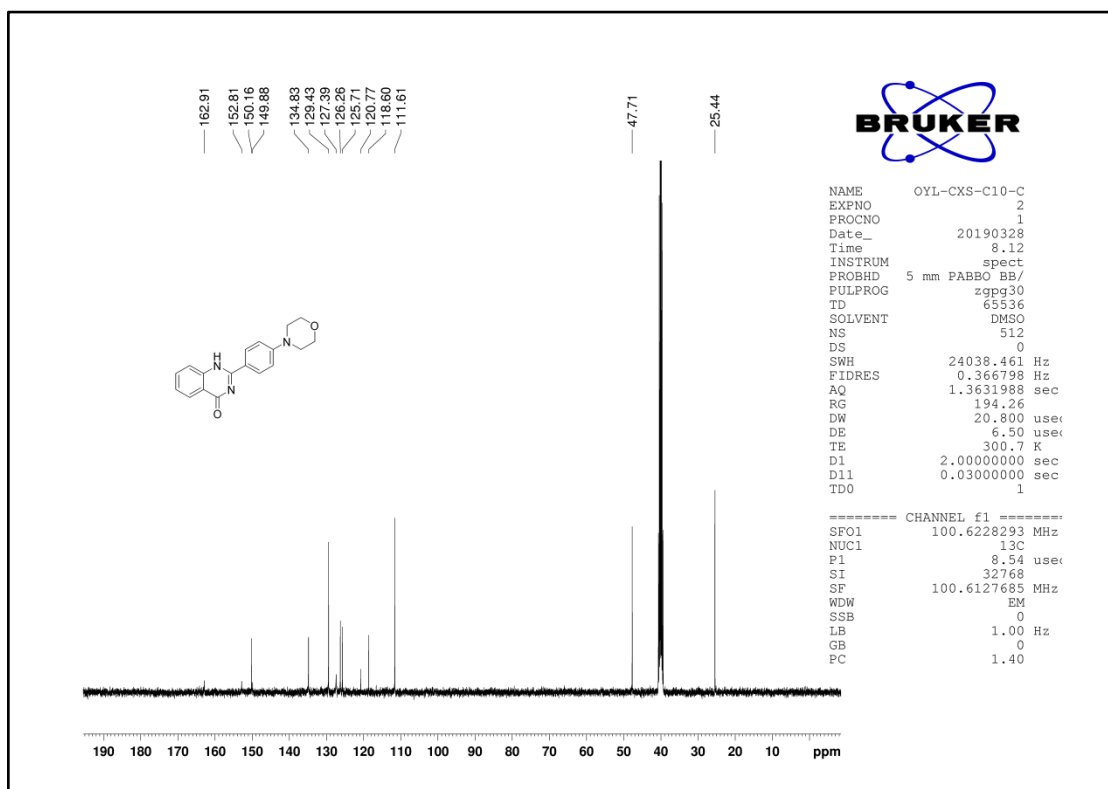

<sup>13</sup>C NMR Spectrum of Compound **5f**

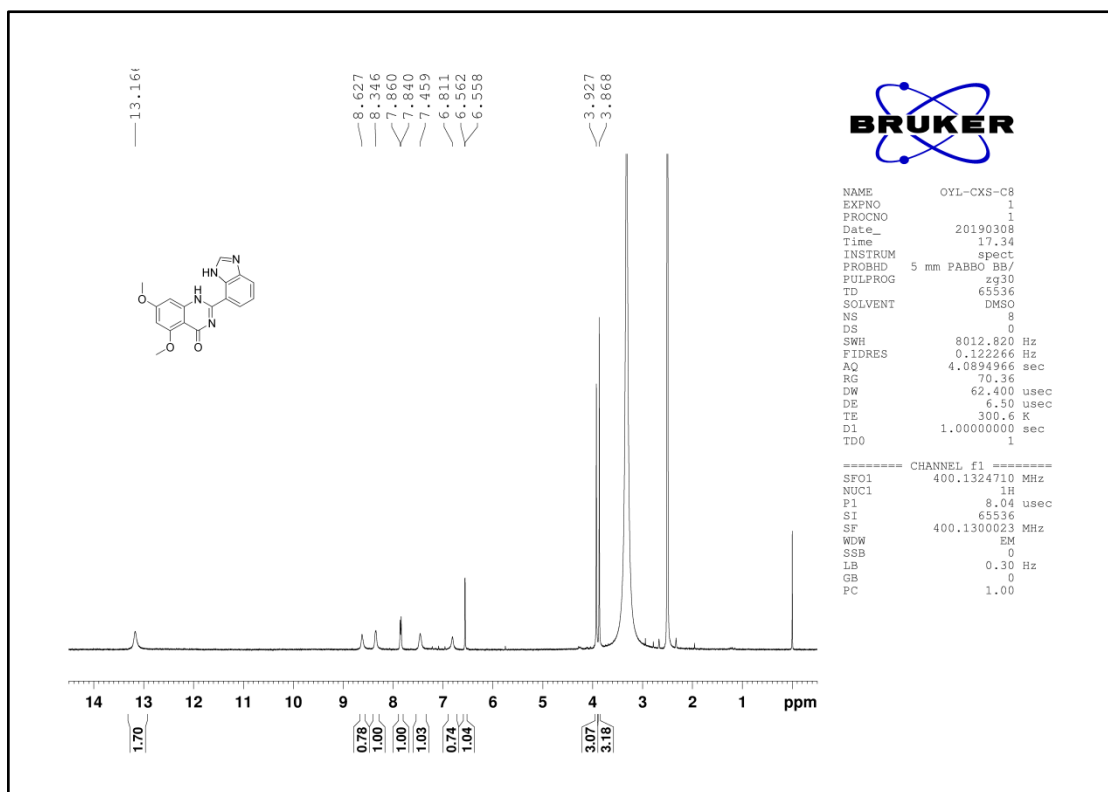

<sup>1</sup>H NMR Spectrum of Compound 5g

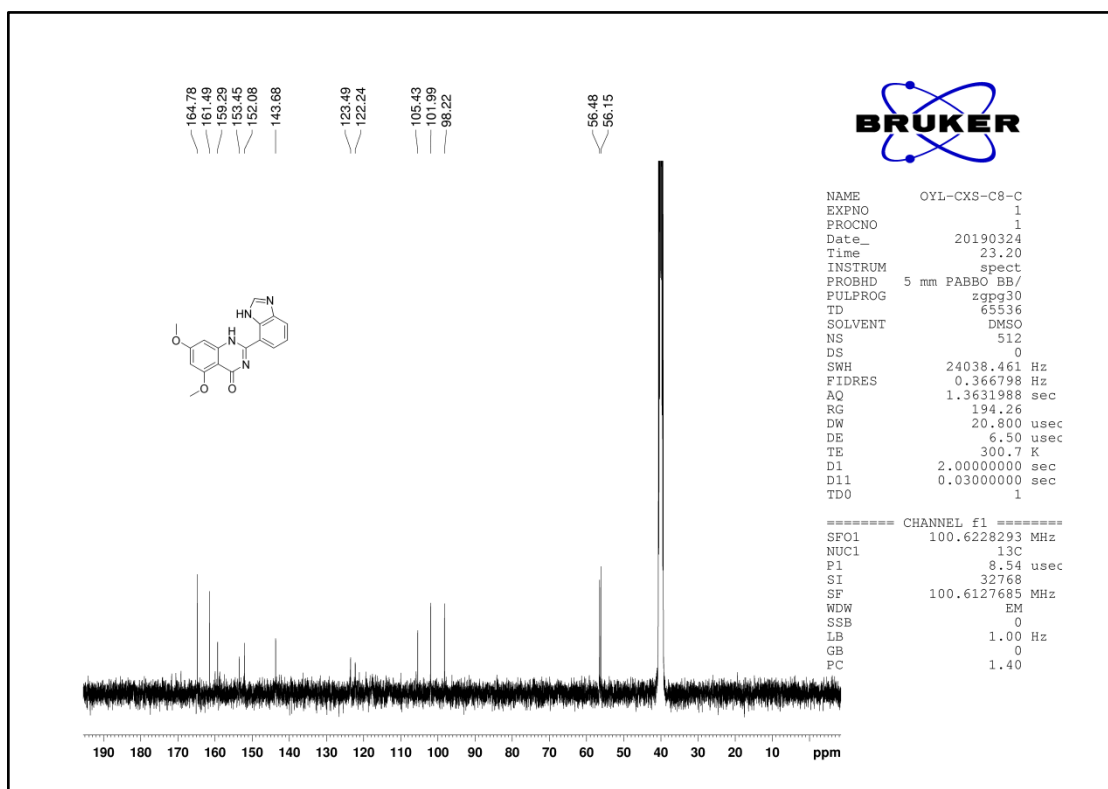

<sup>13</sup>C NMR Spectrum of Compound 5g

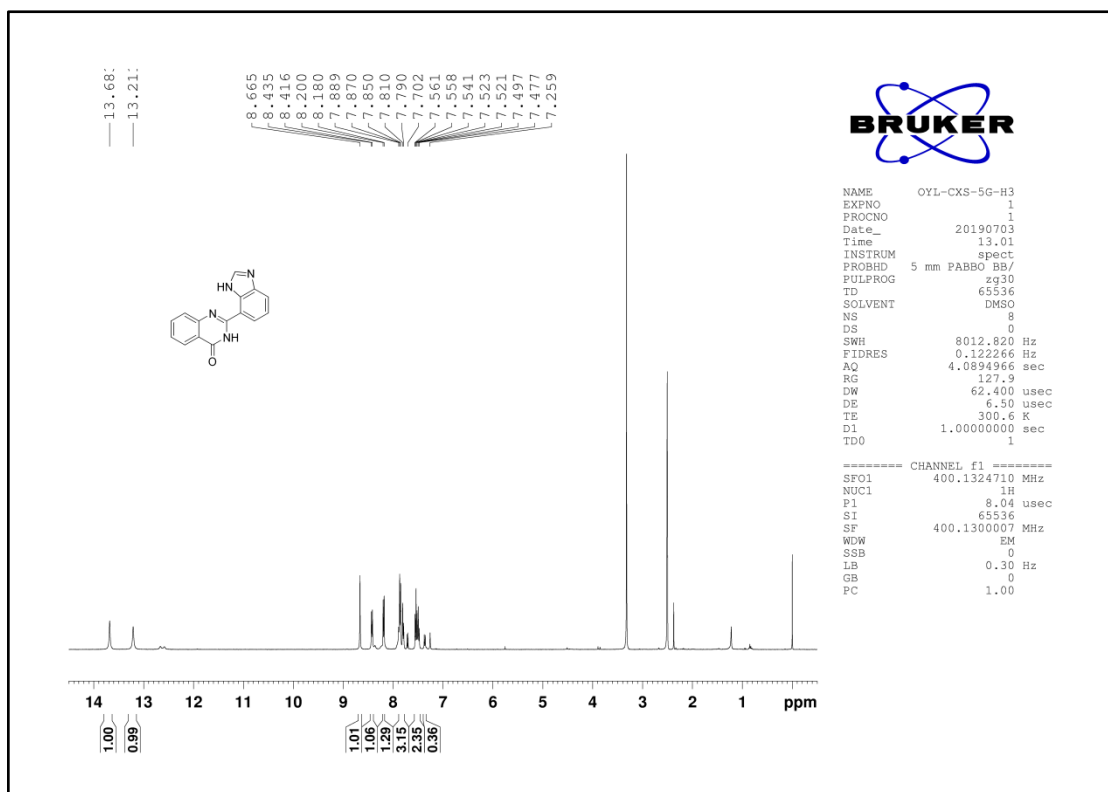

<sup>1</sup>H NMR Spectrum of Compound 5h

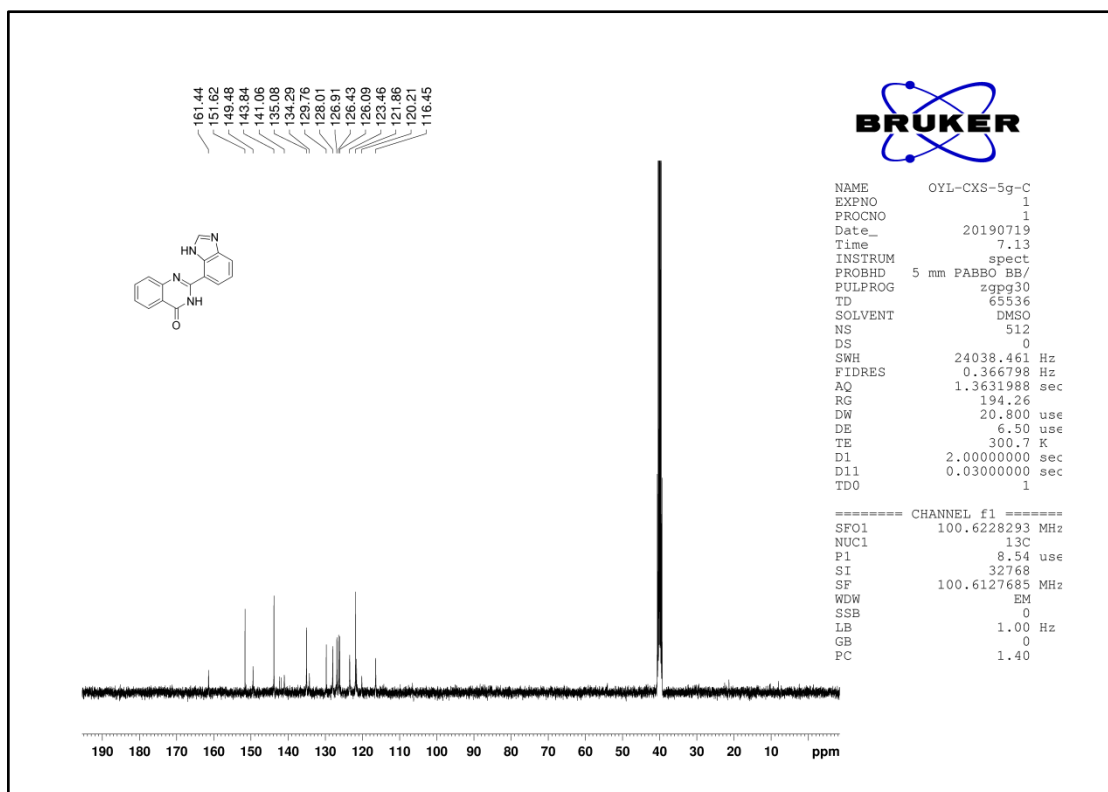

<sup>13</sup>C NMR Spectrum of Compound 5h

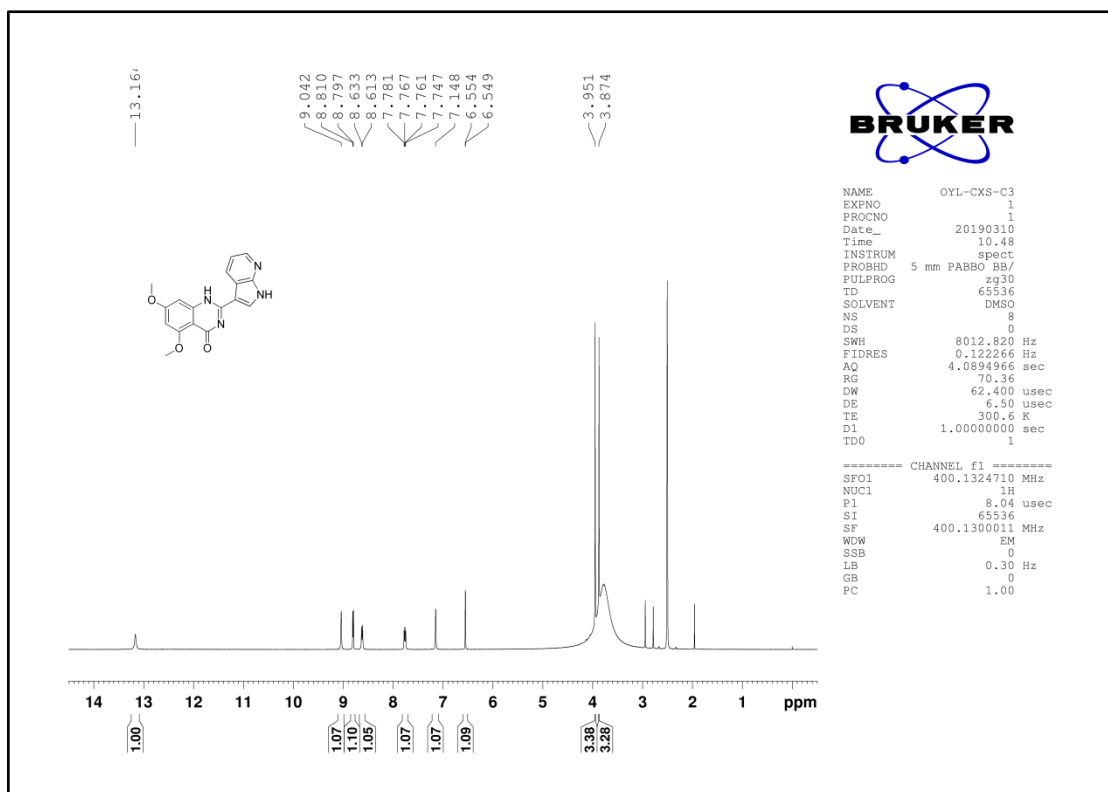

**<sup>1</sup>H NMR Spectrum of Compound 5i**

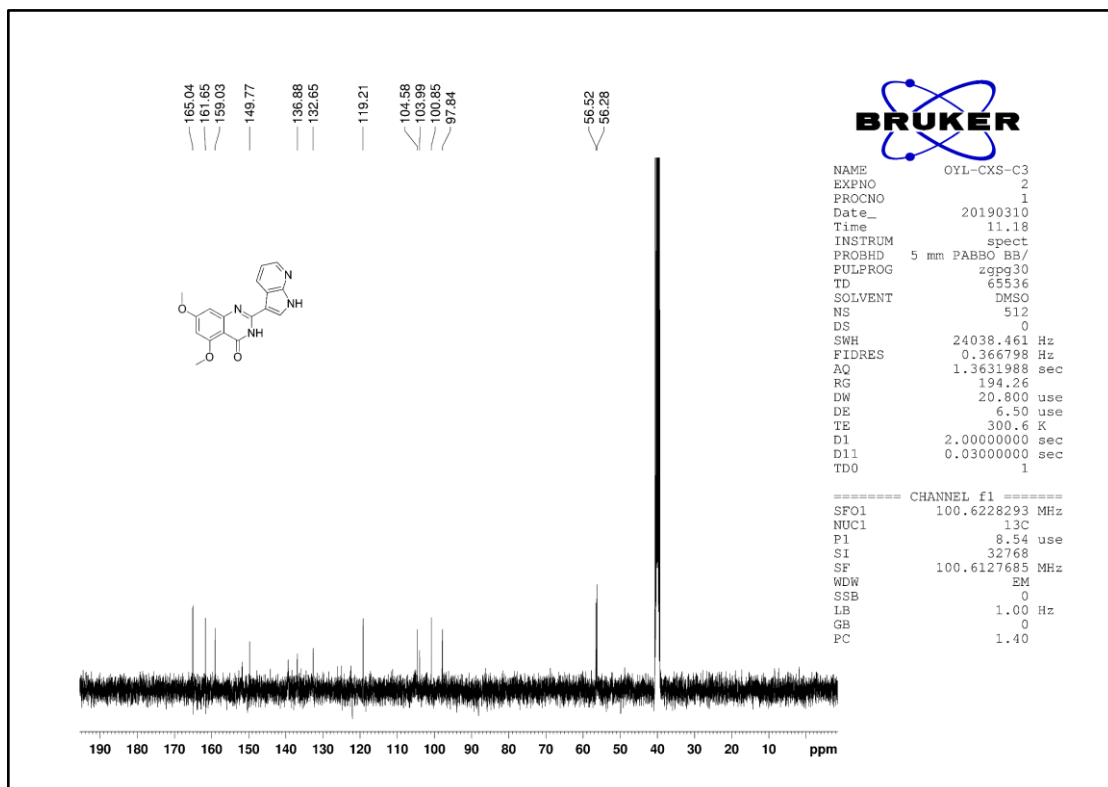

**<sup>13</sup>C NMR Spectrum of Compound 5i**

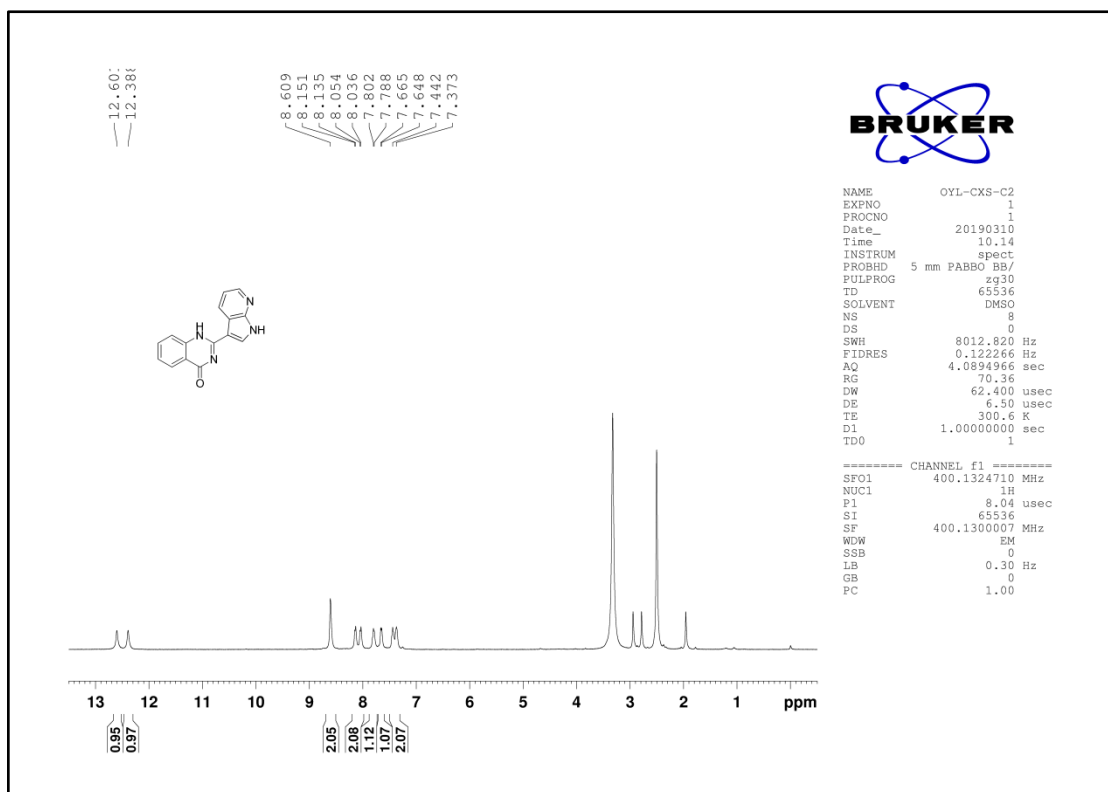

<sup>1</sup>H NMR Spectrum of Compound 5j

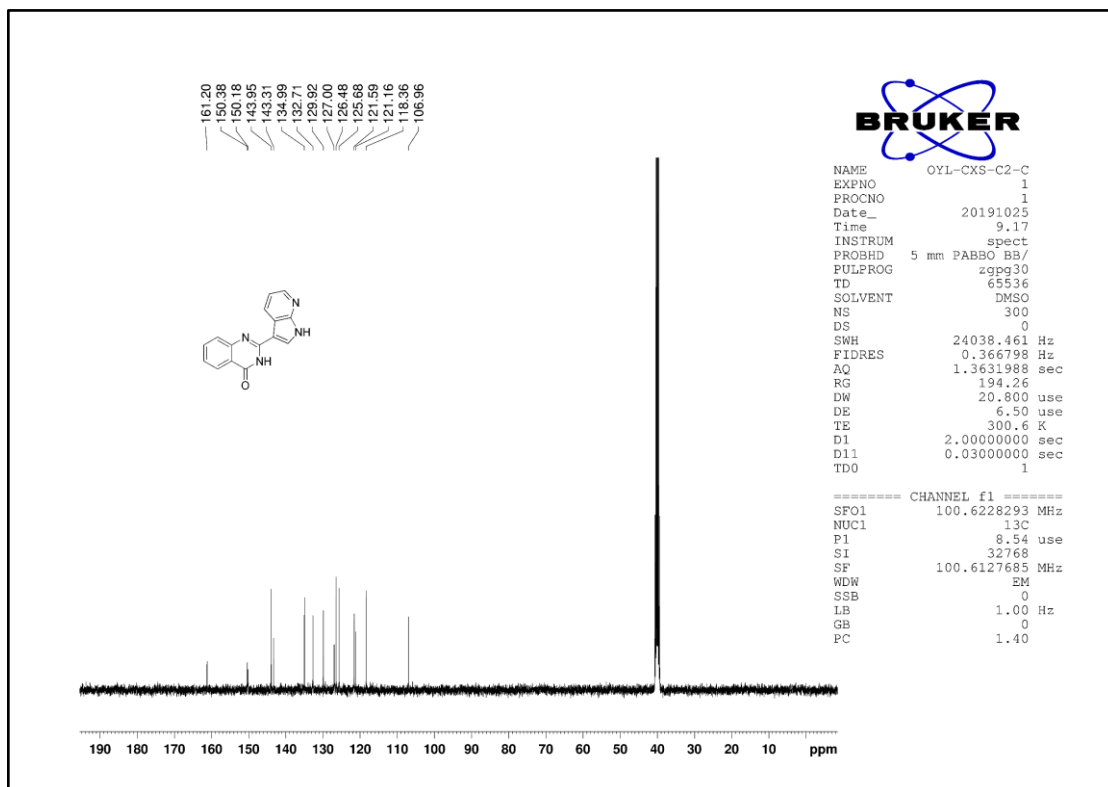

<sup>13</sup>C NMR Spectrum of Compound 5j



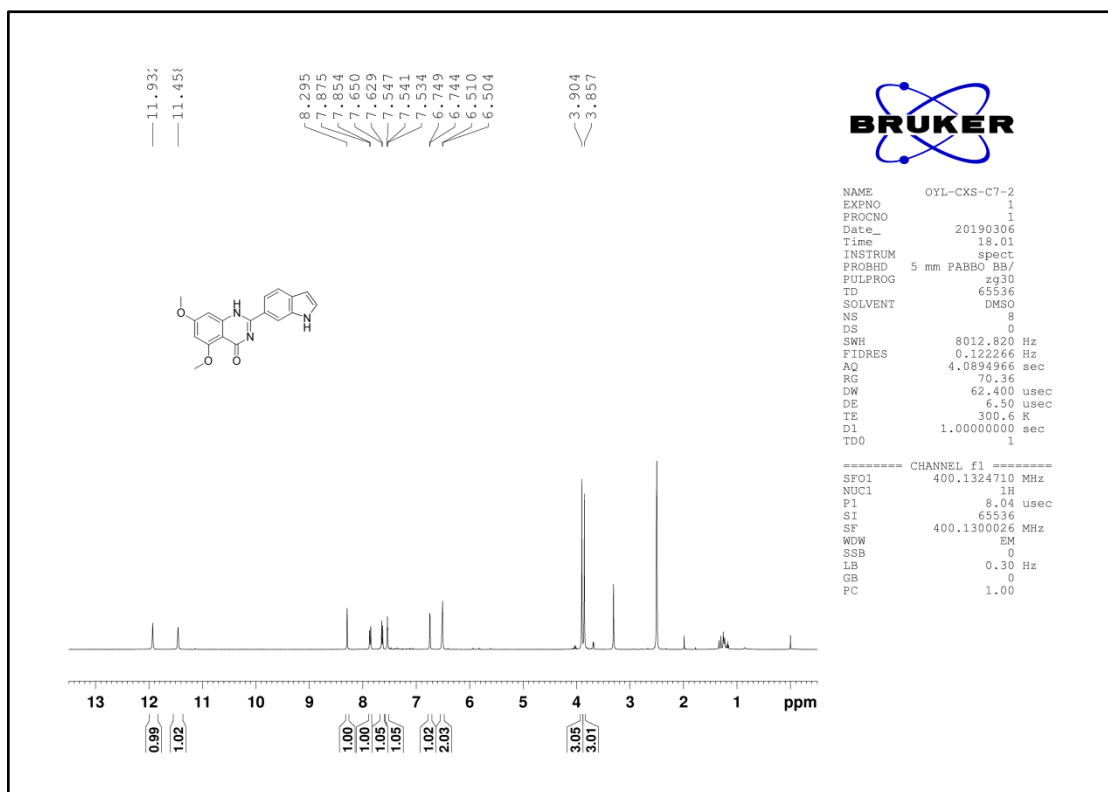

<sup>1</sup>H NMR Spectrum of Compound 5k

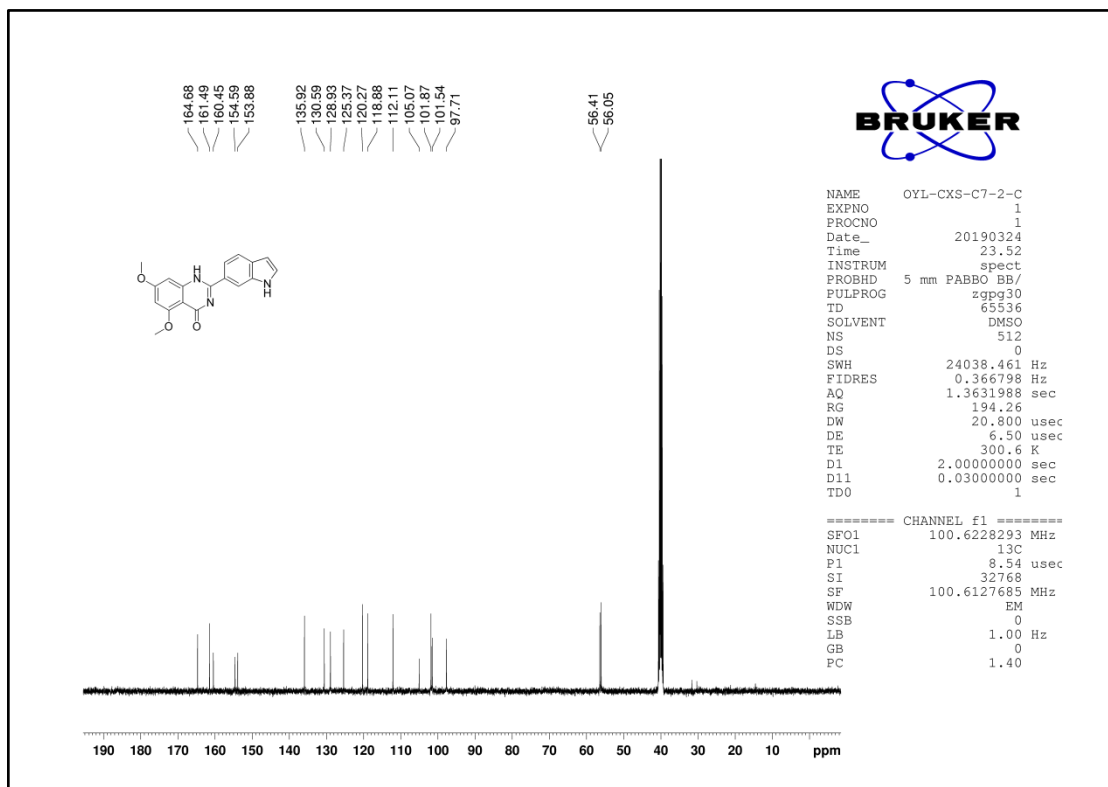

<sup>13</sup>C NMR Spectrum of Compound 5k

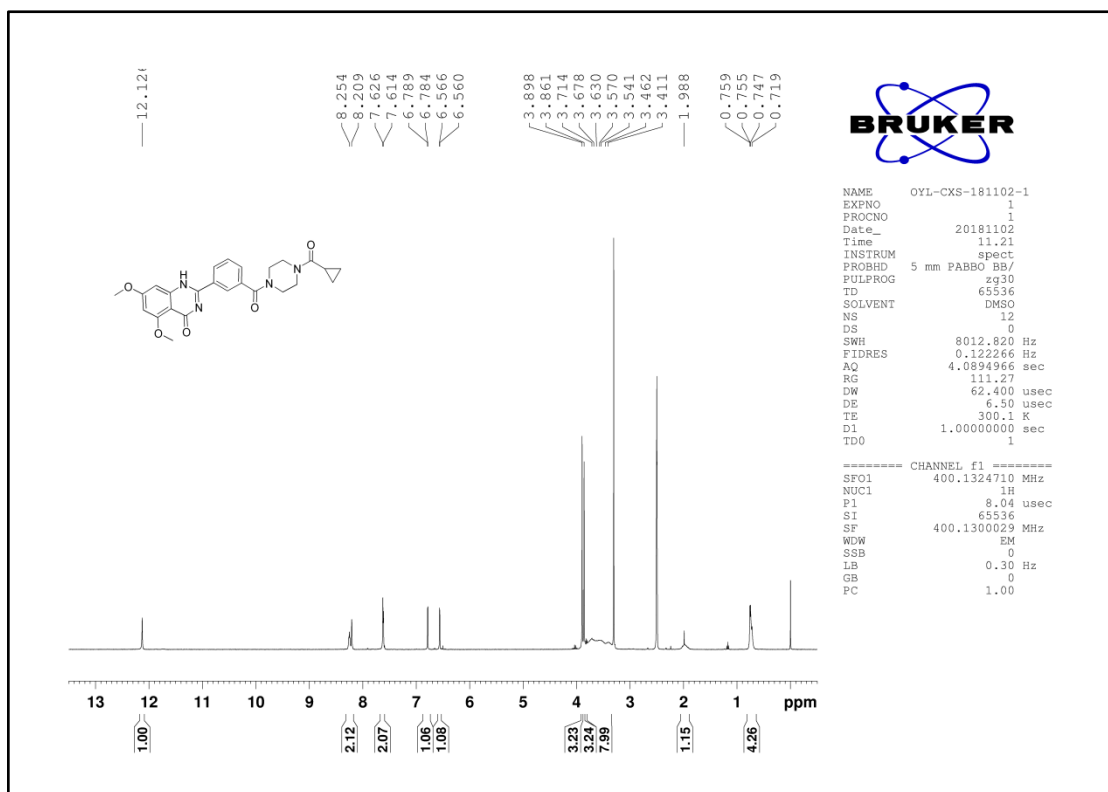

<sup>1</sup>H NMR Spectrum of Compound 11a

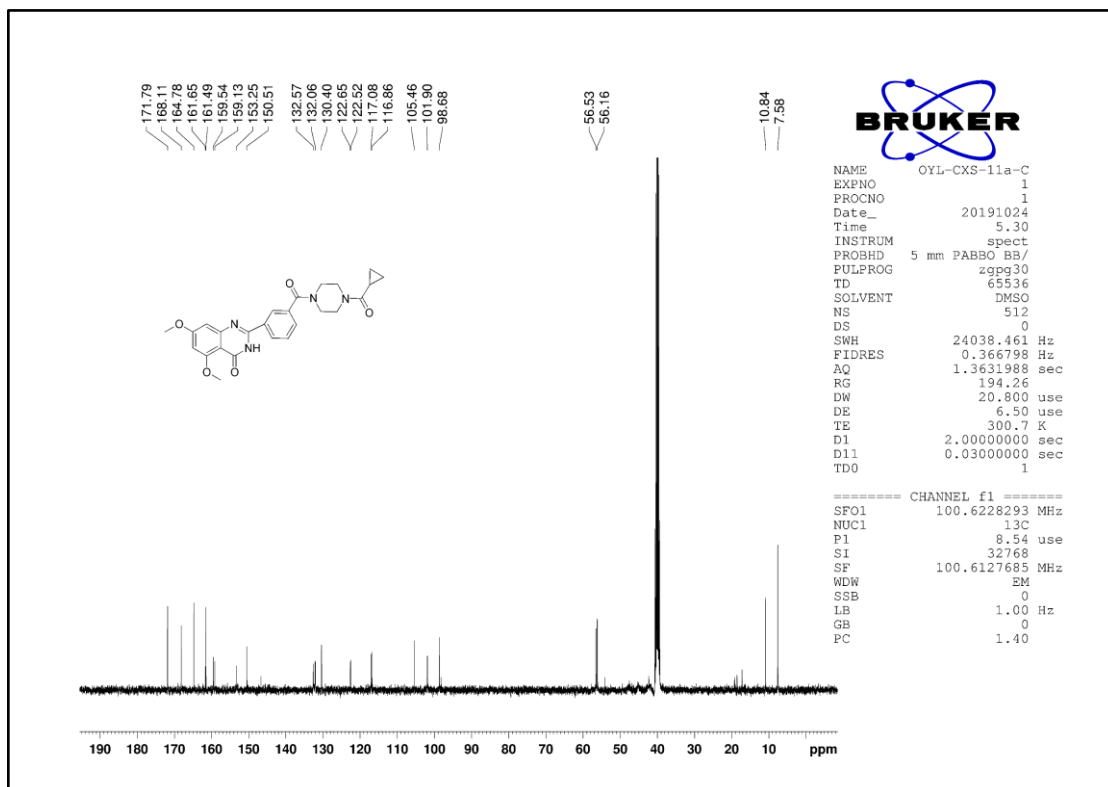

<sup>13</sup>C NMR Spectrum of Compound 11a

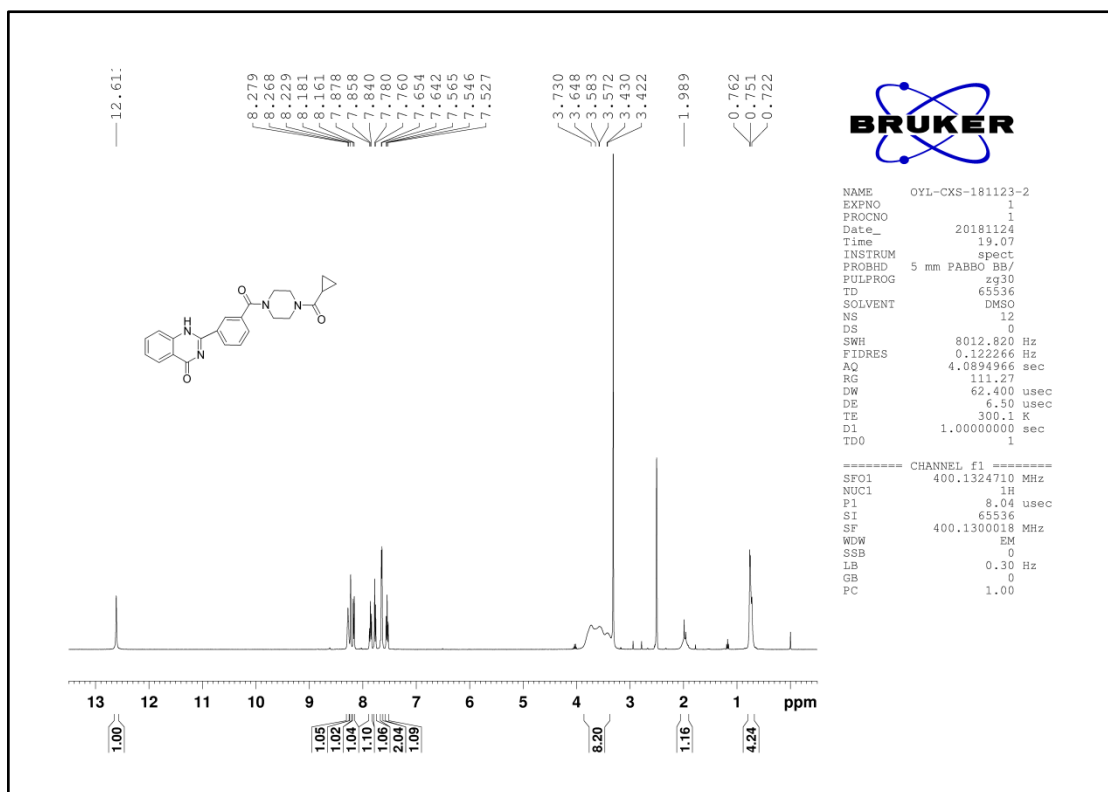

<sup>1</sup>H NMR Spectrum of Compound 11b

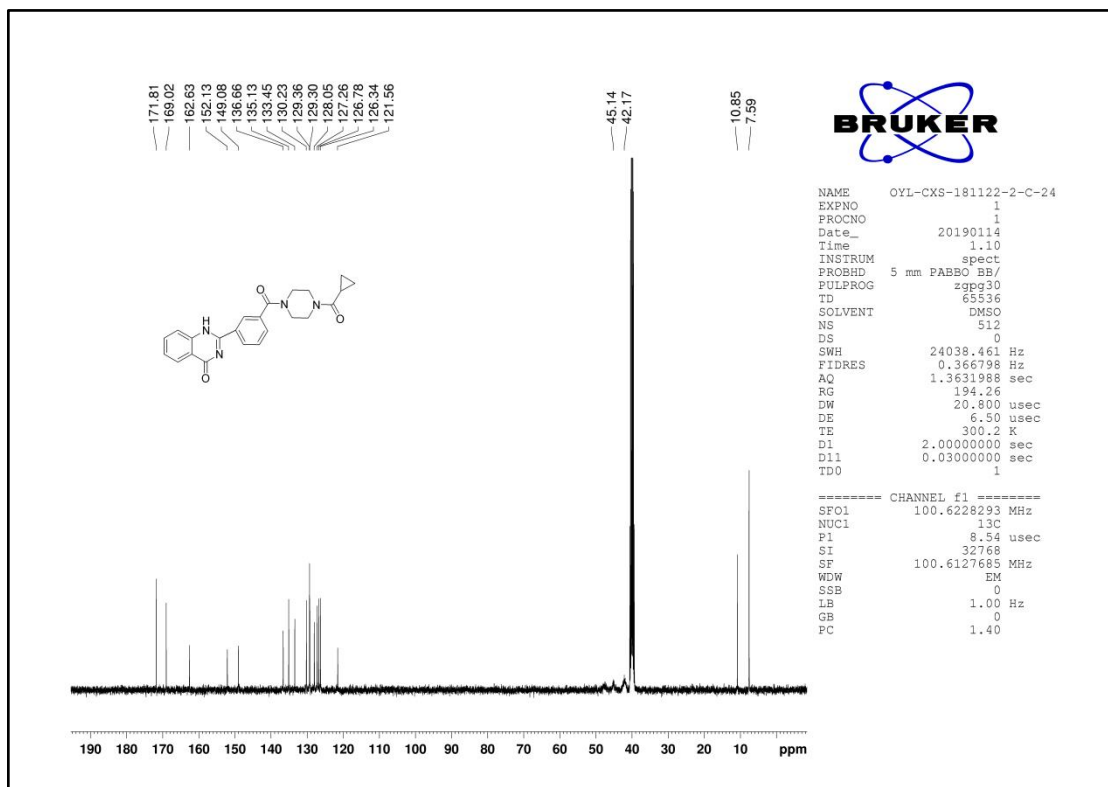

<sup>13</sup>C NMR Spectrum of Compound 11b

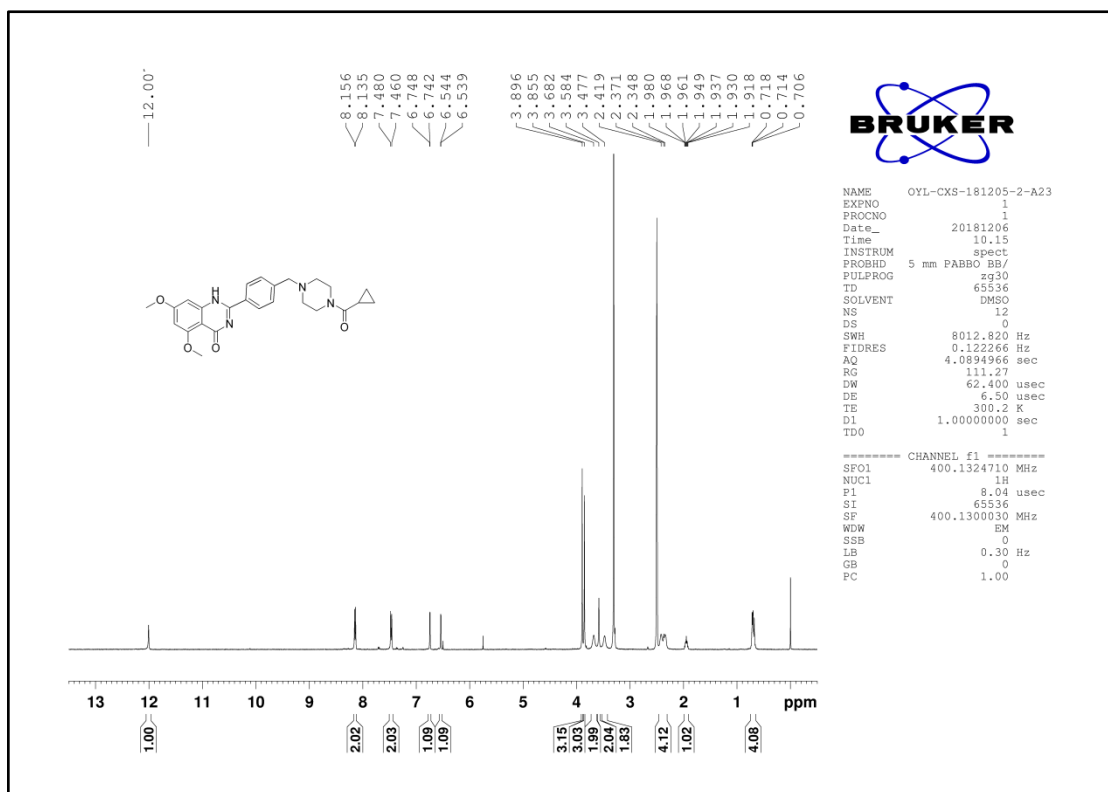

<sup>1</sup>H NMR Spectrum of Compound 11c

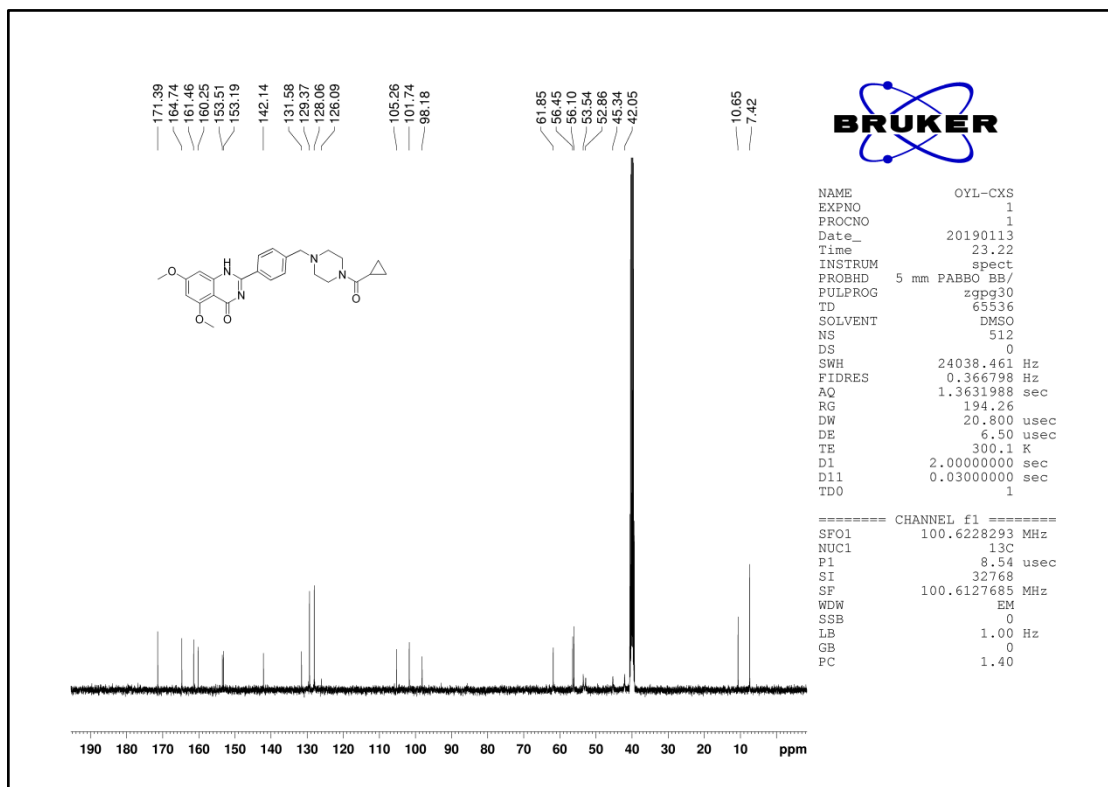

<sup>13</sup>C NMR Spectrum of Compound 11c

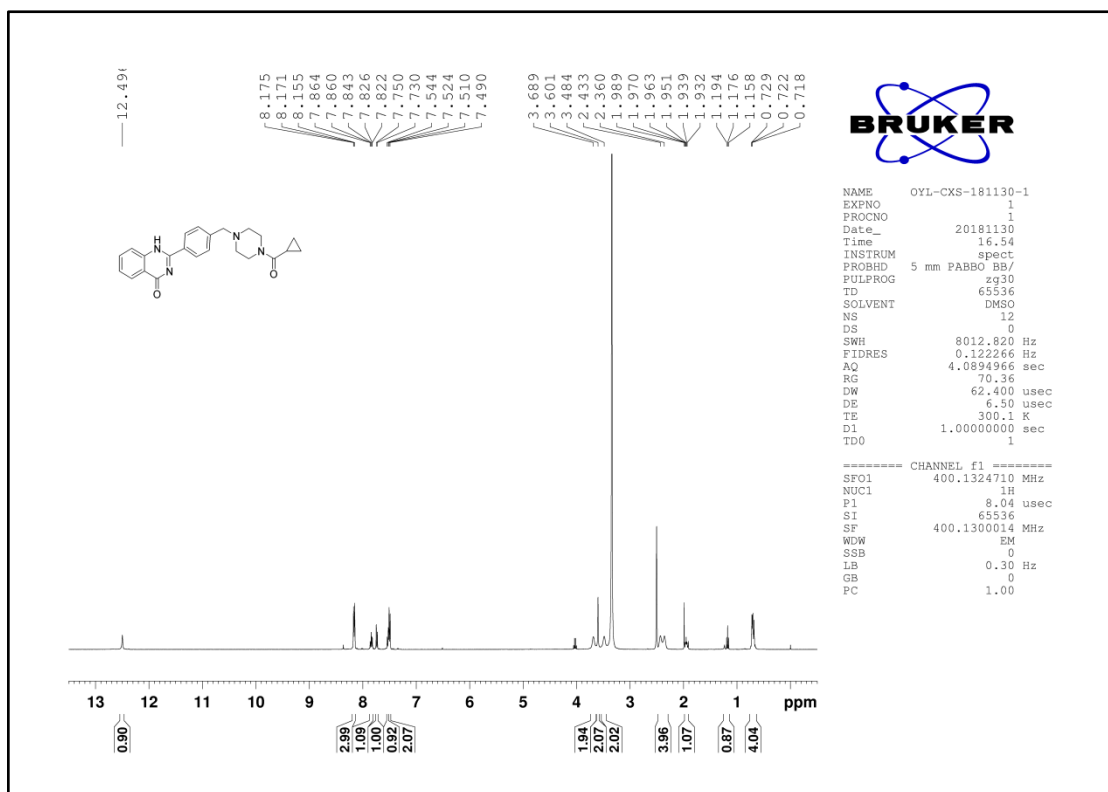

<sup>1</sup>H NMR Spectrum of Compound 11d

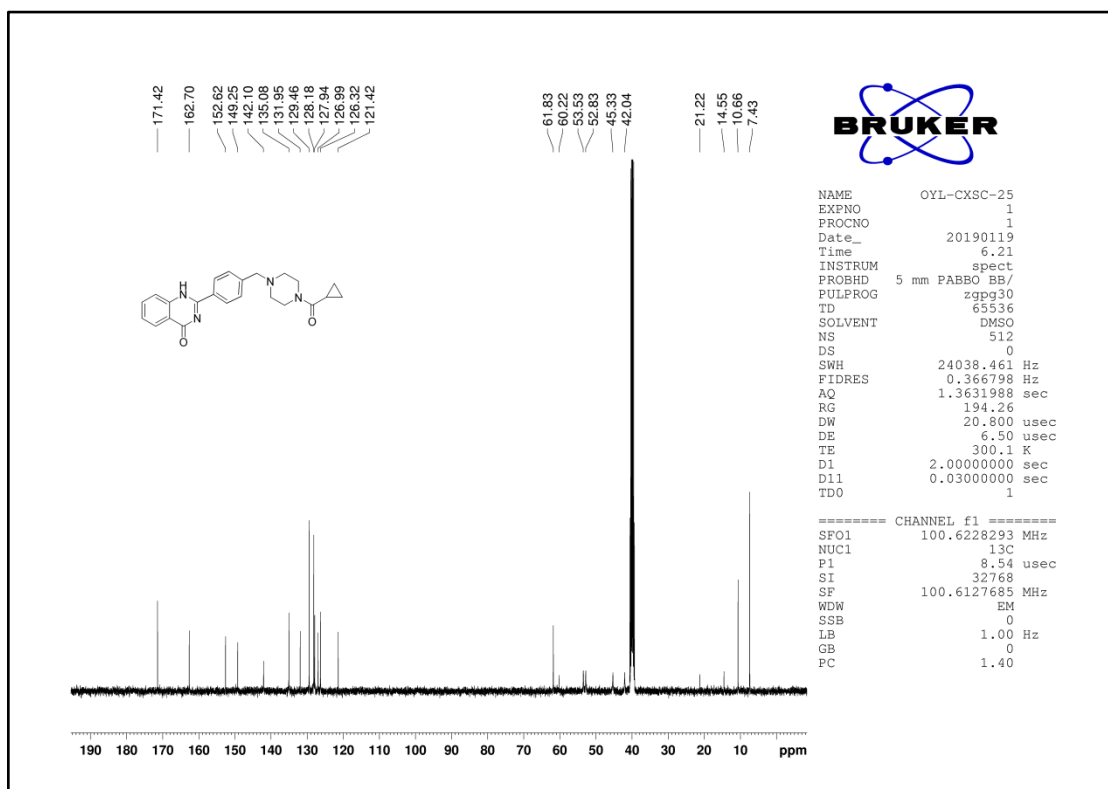

<sup>13</sup>C NMR Spectrum of Compound 11d

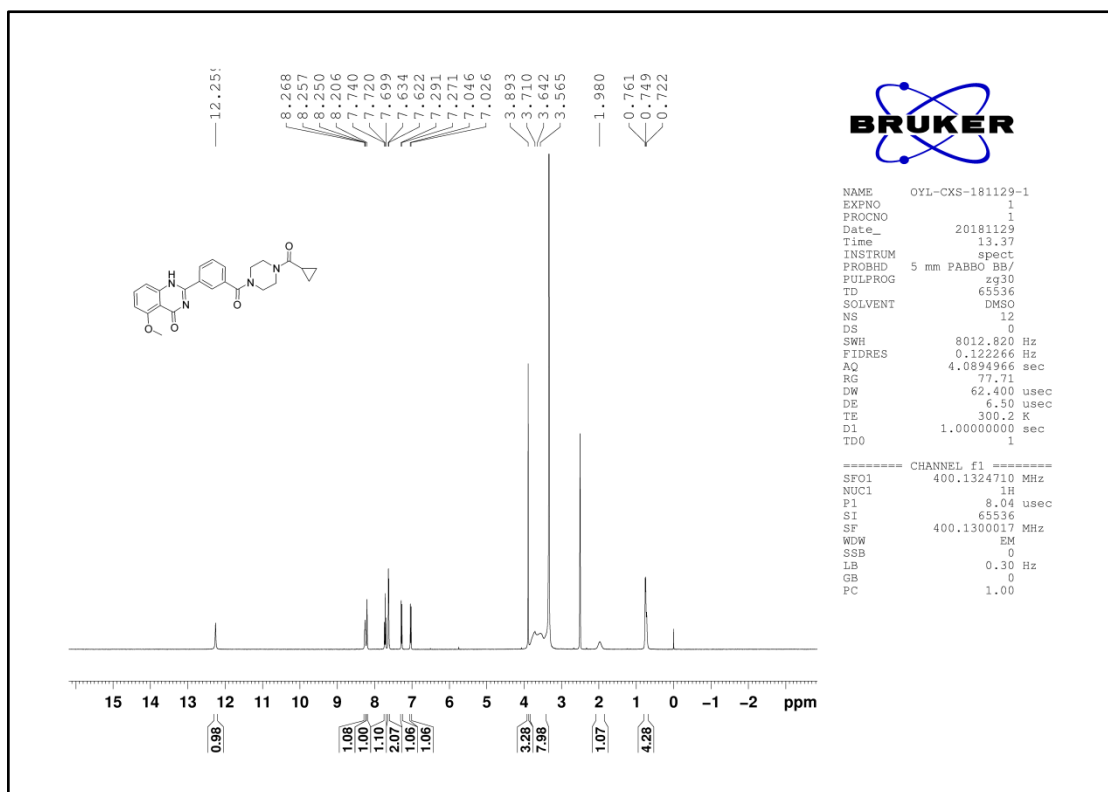

<sup>1</sup>H NMR Spectrum of Compound 11e

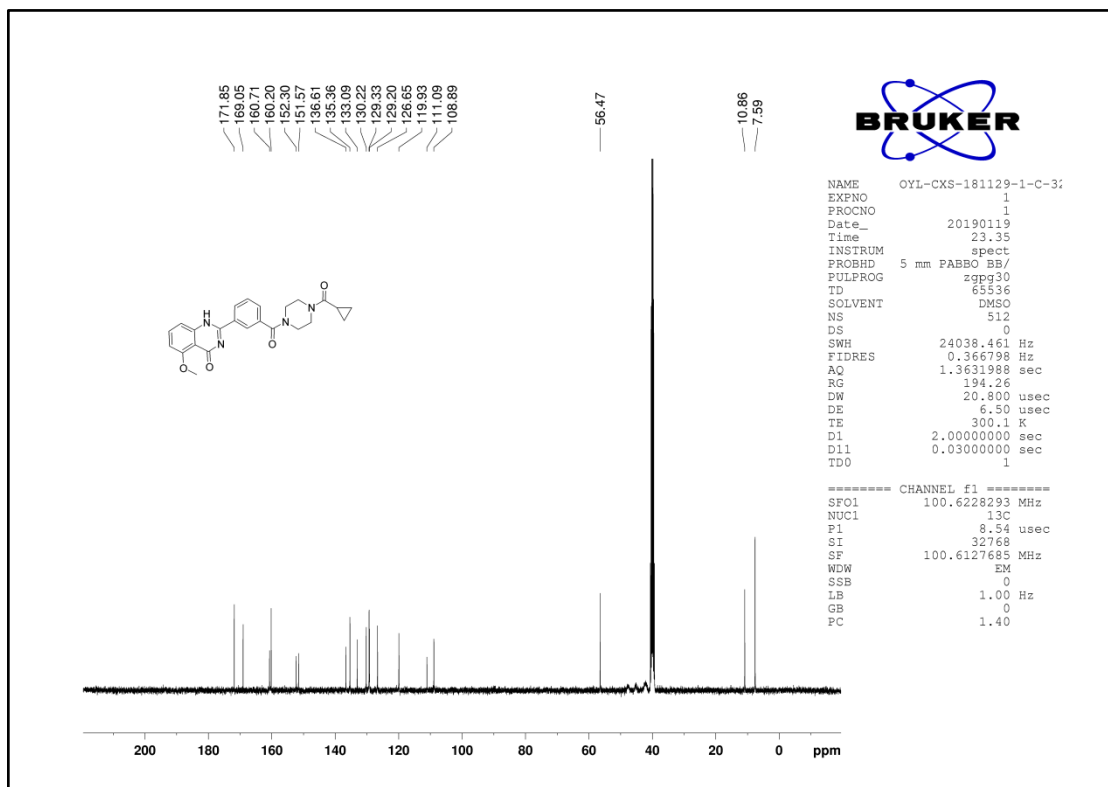

<sup>13</sup>C NMR Spectrum of Compound 11e

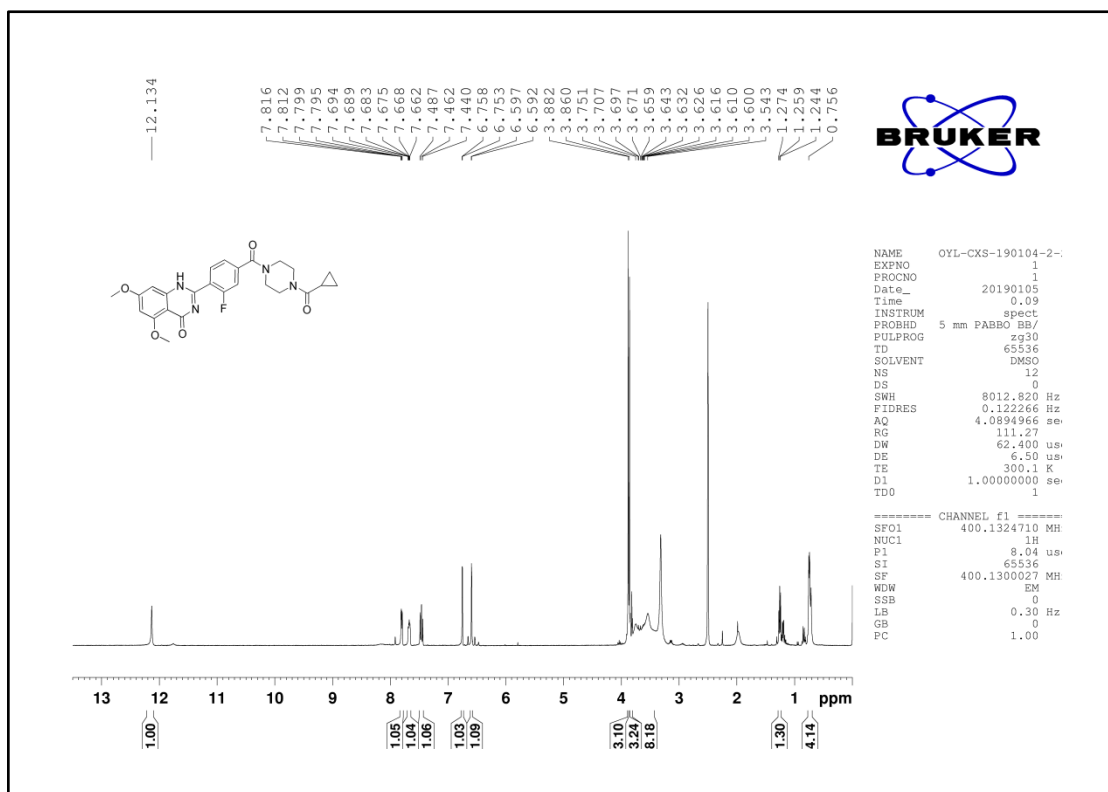

<sup>1</sup>H NMR Spectrum of Compound 15a

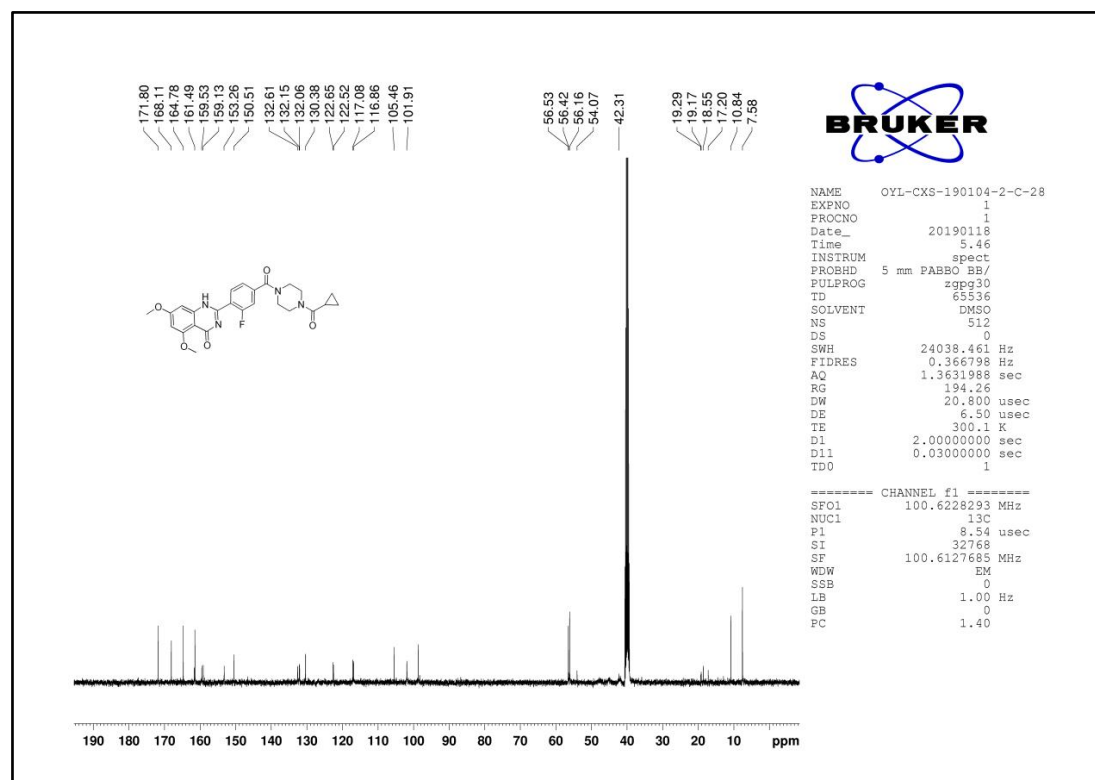

<sup>13</sup>C NMR Spectrum of Compound 15a

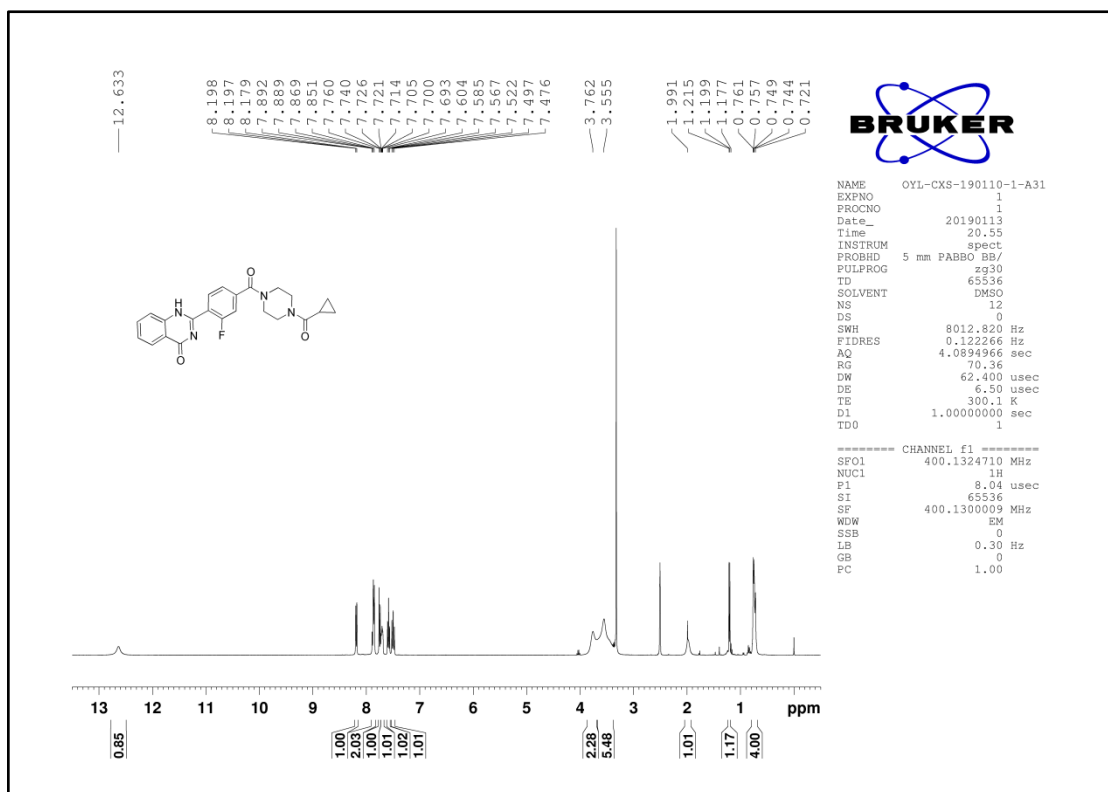

<sup>1</sup>H NMR Spectrum of Compound 15b

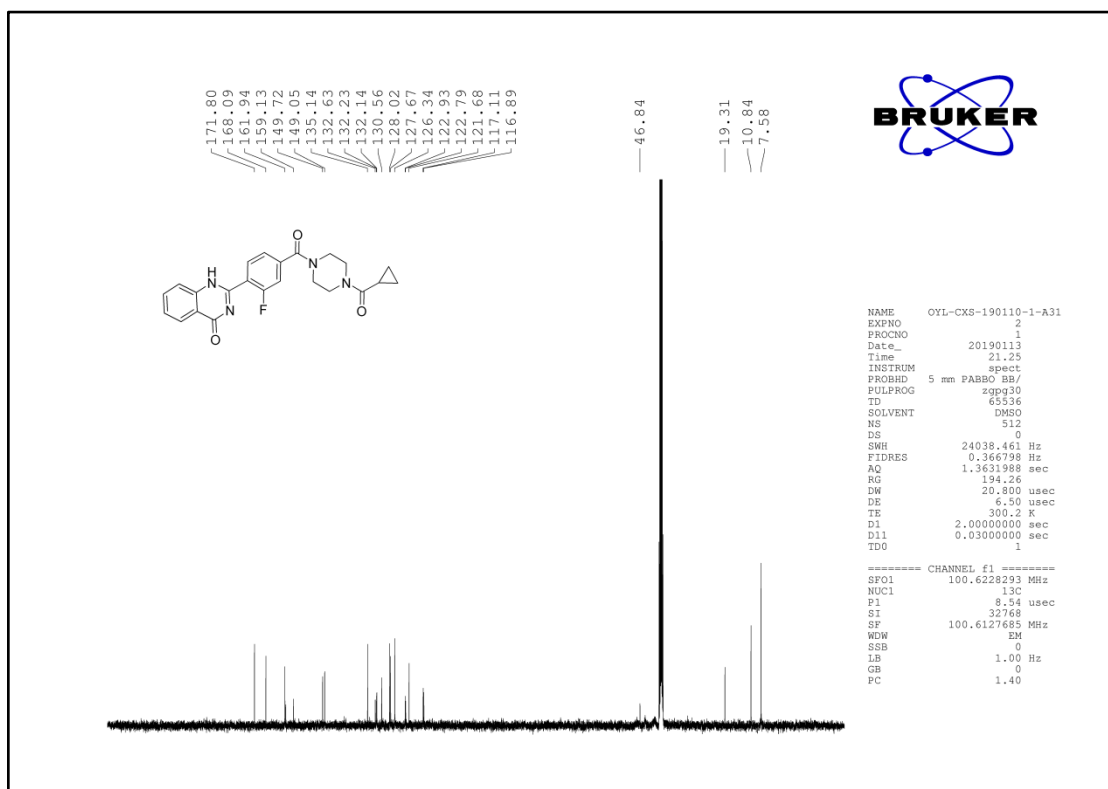

<sup>13</sup>C NMR Spectrum of Compound 15b



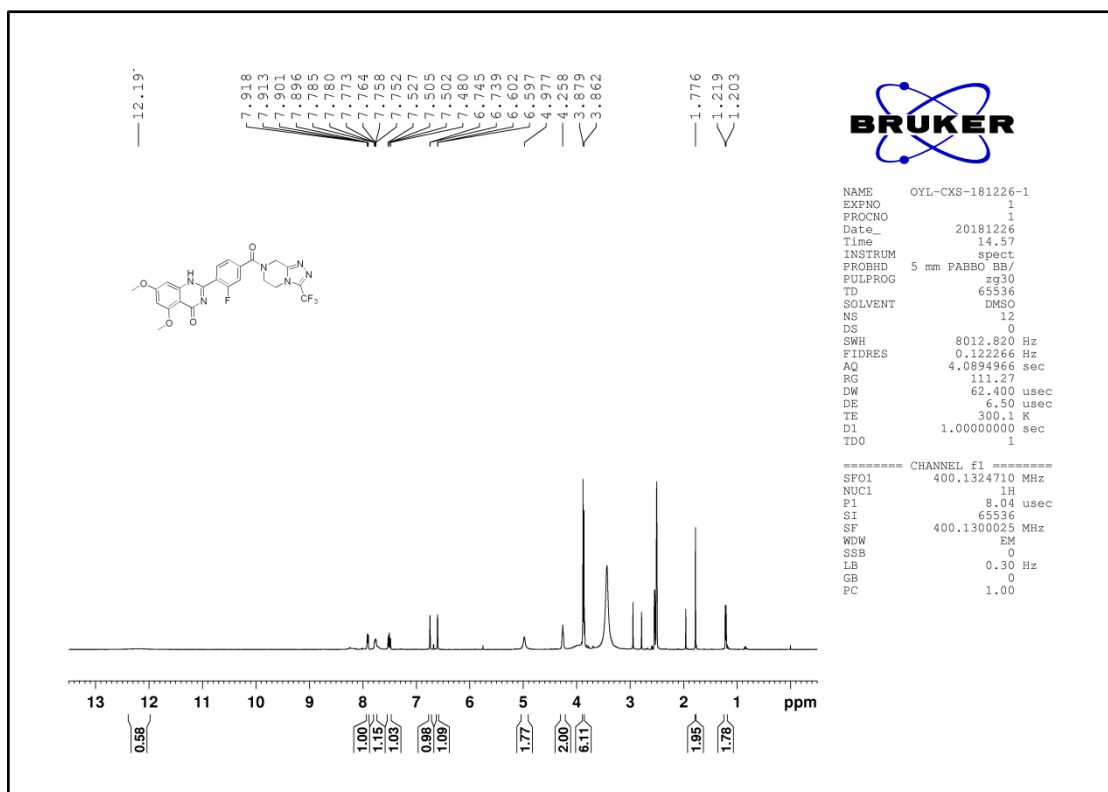

<sup>1</sup>H NMR Spectrum of Compound 15c

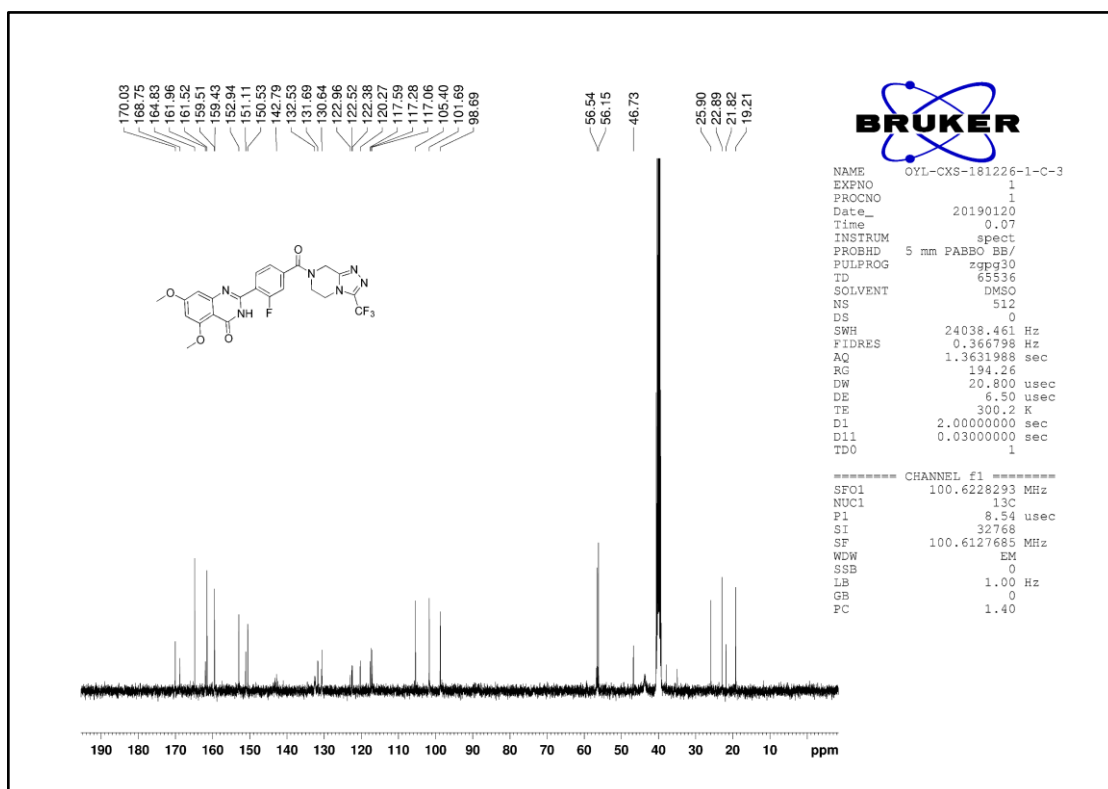

<sup>13</sup>C NMR Spectrum of Compound 15c

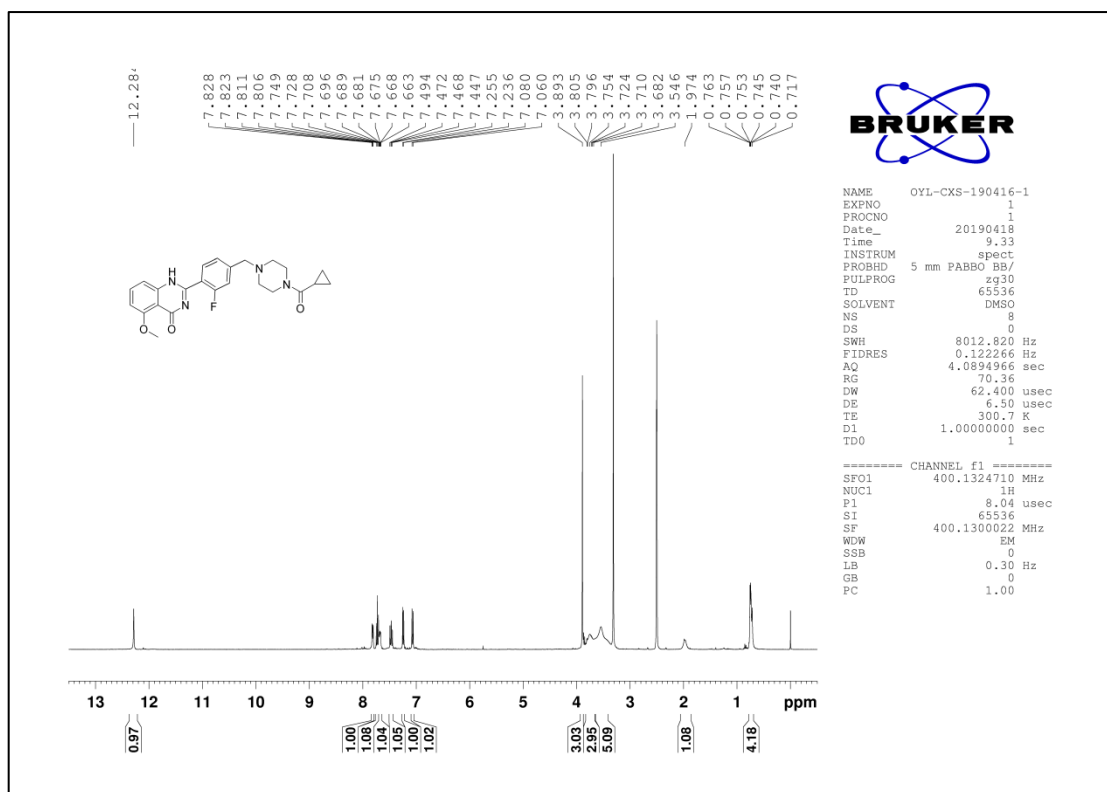

**<sup>1</sup>H NMR Spectrum of Compound 15d**

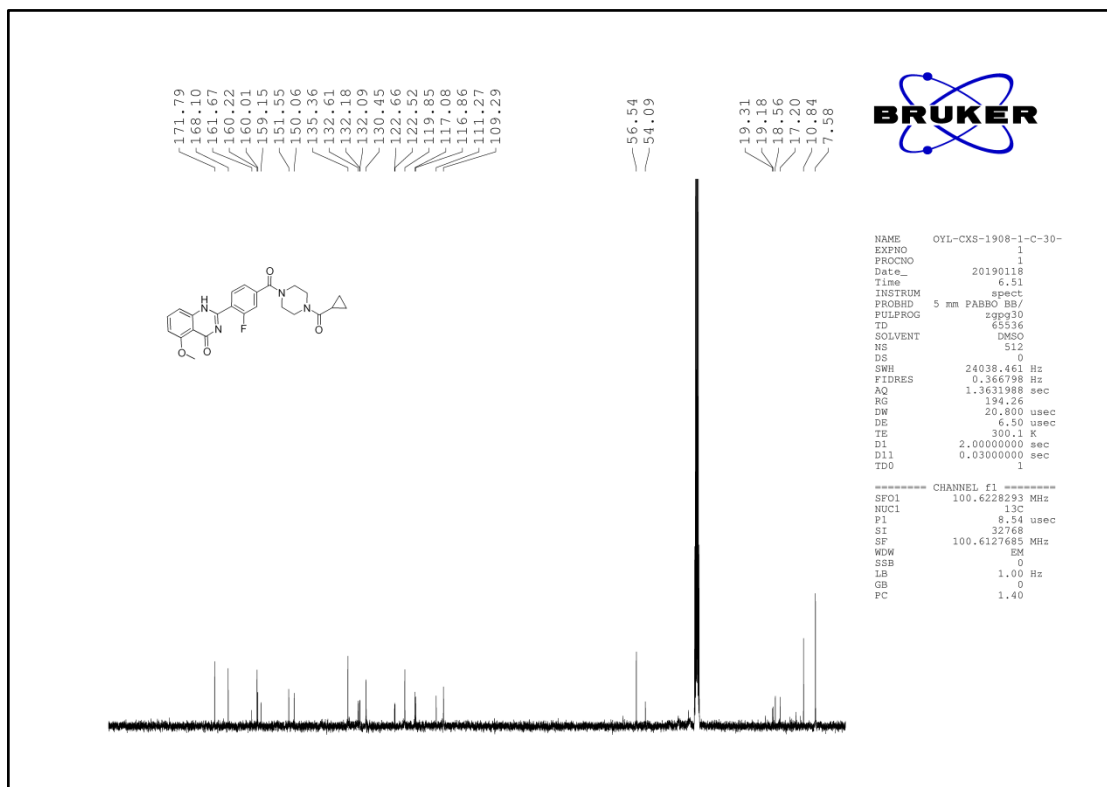

**<sup>13</sup>C NMR Spectrum of Compound 15d**

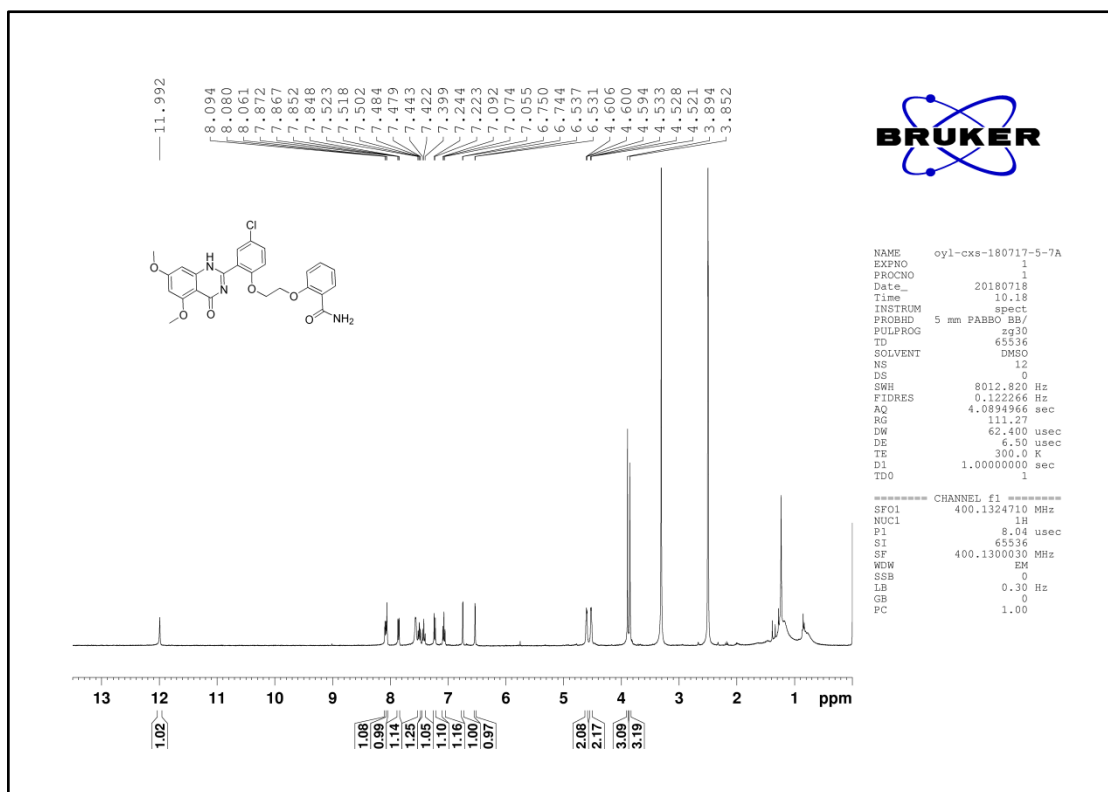

<sup>1</sup>H NMR Spectrum of Compound 19a

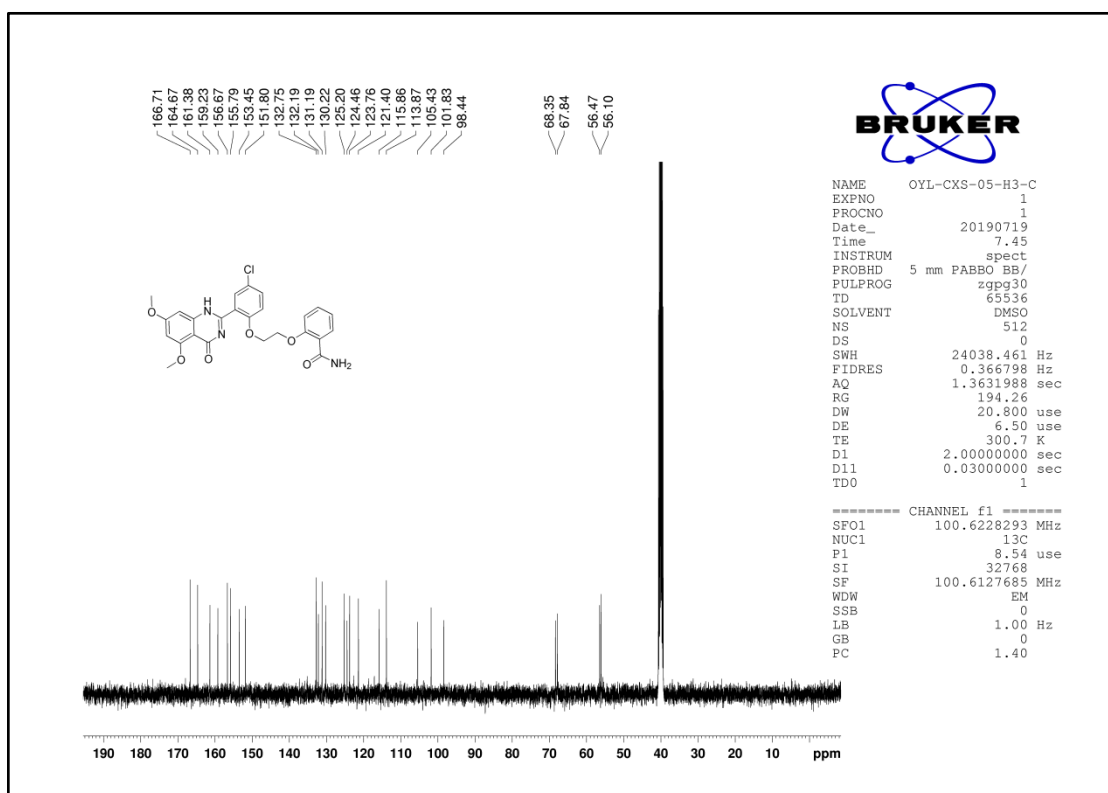

<sup>13</sup>C NMR Spectrum of Compound 19a

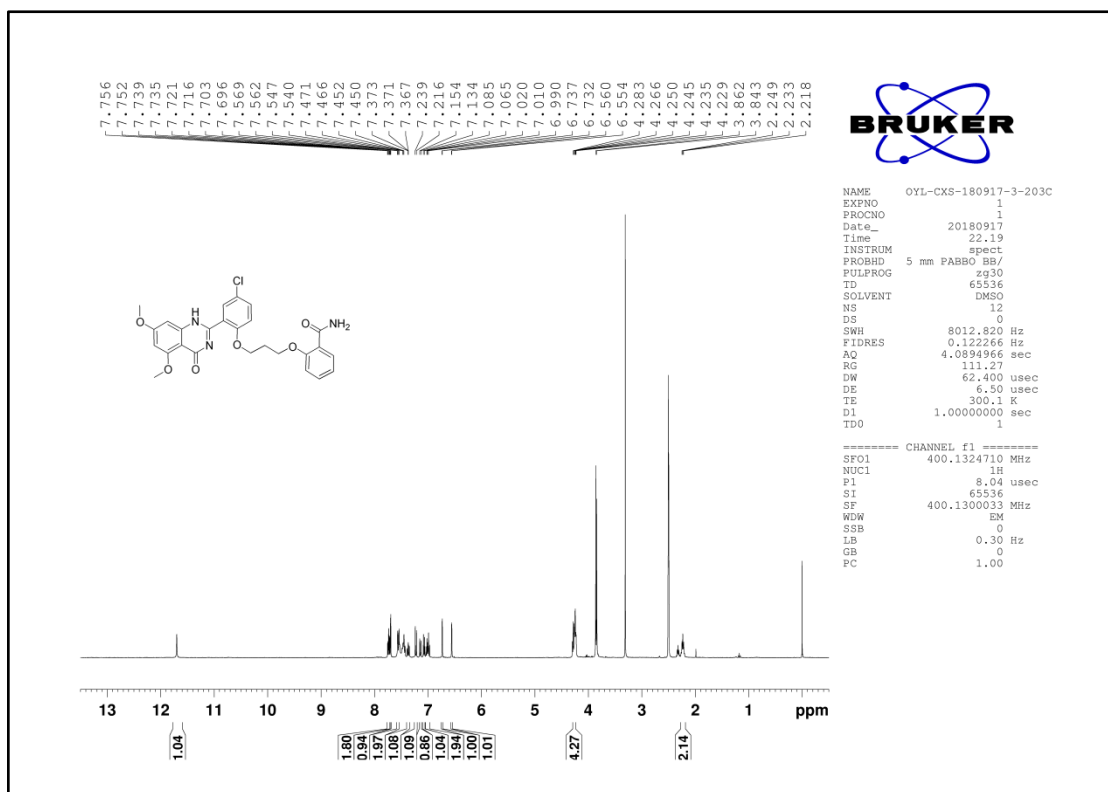

**<sup>1</sup>H NMR Spectrum of Compound 19b**

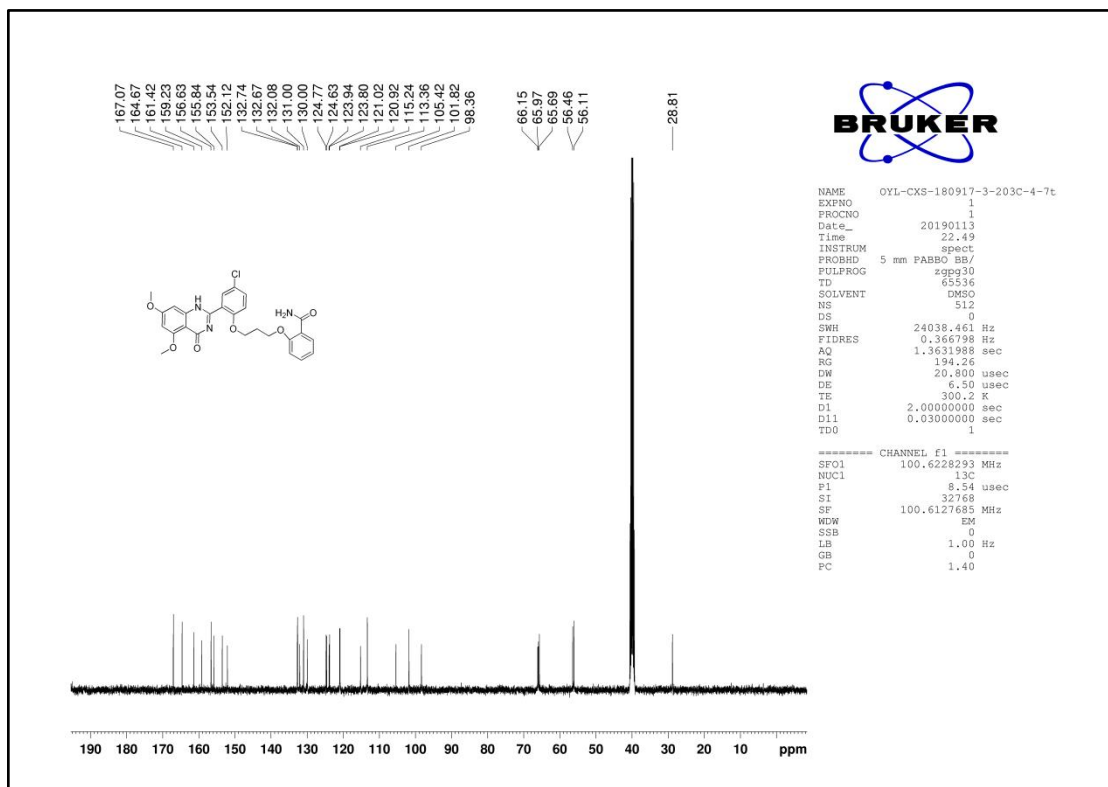

**<sup>13</sup>C NMR Spectrum of Compound 19b**

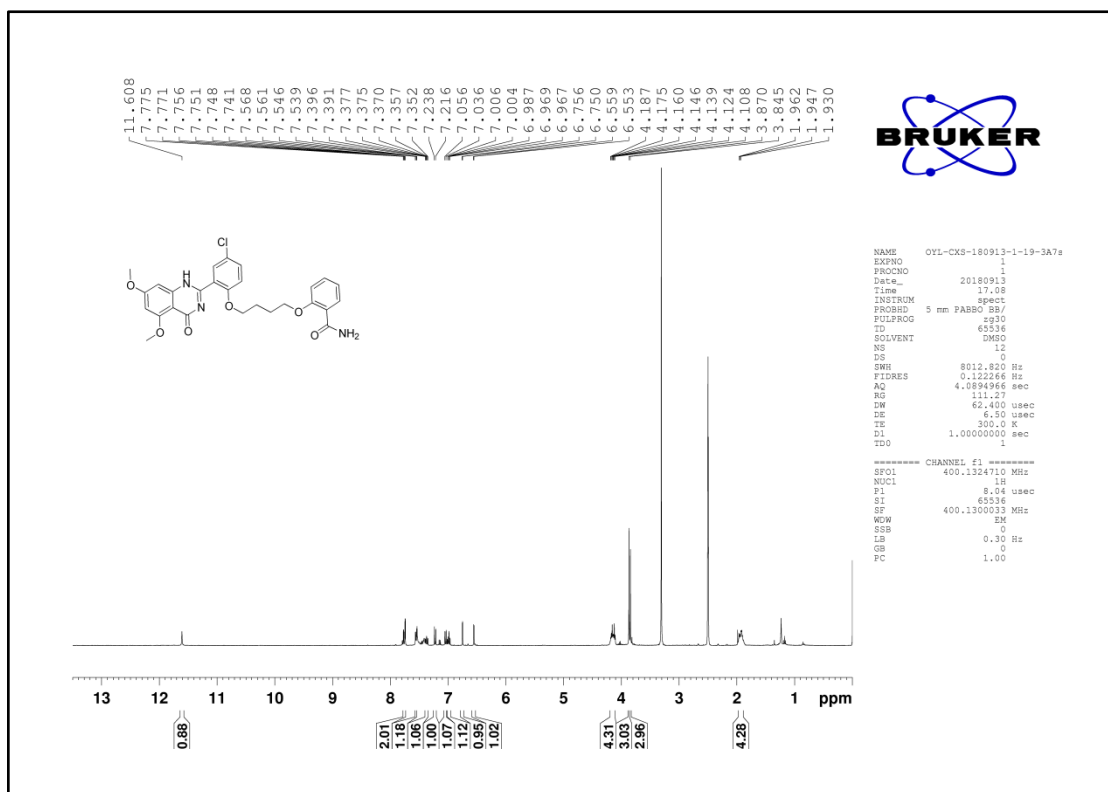

<sup>1</sup>H NMR Spectrum of Compound 19c

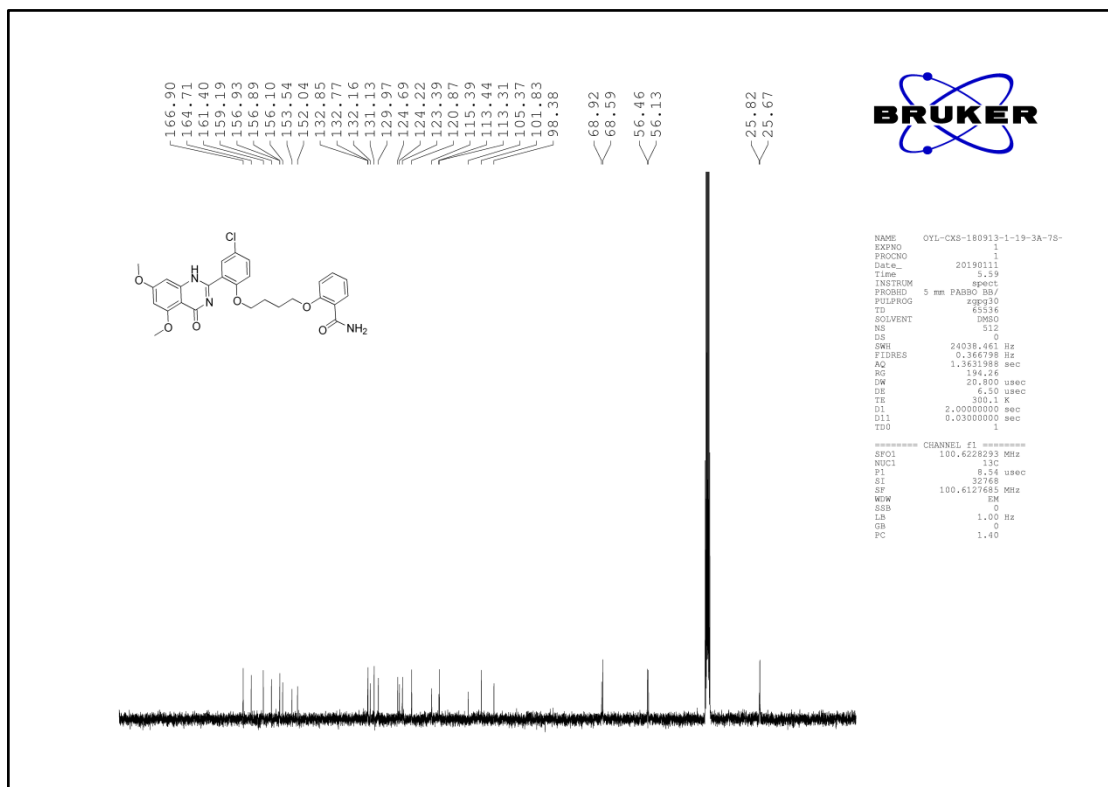

<sup>13</sup>C NMR Spectrum of Compound 19c

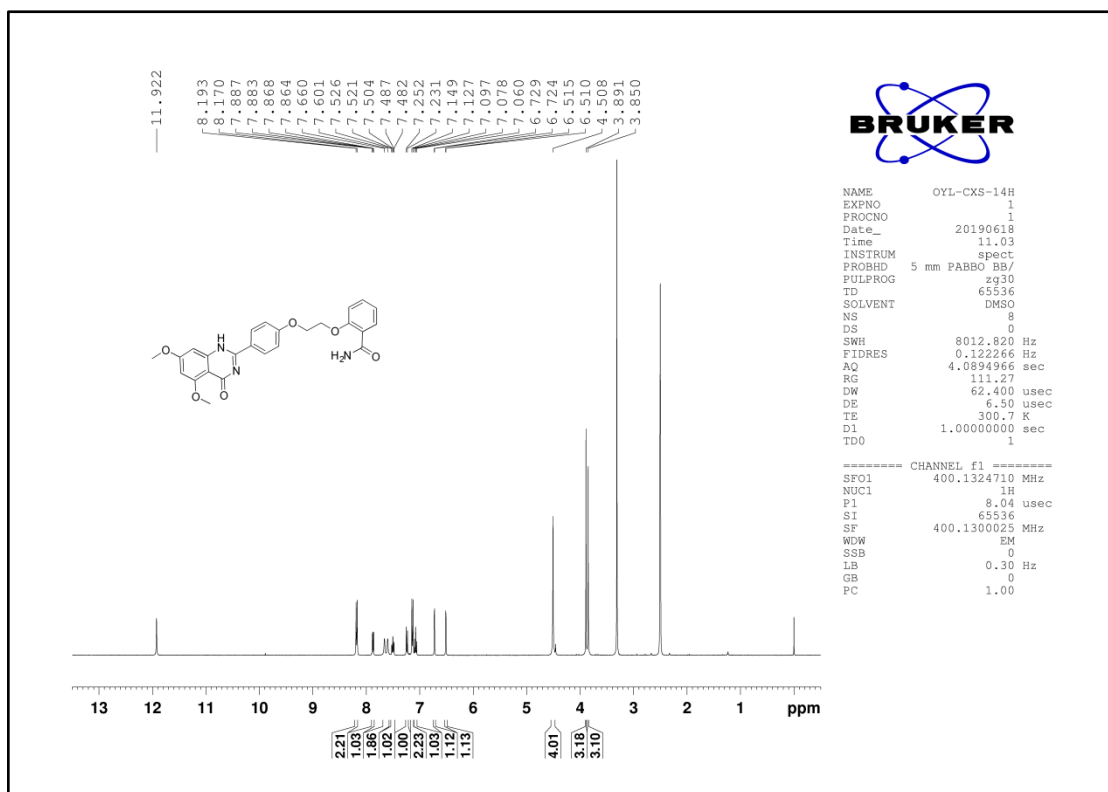

<sup>1</sup>H NMR Spectrum of Compound 19d

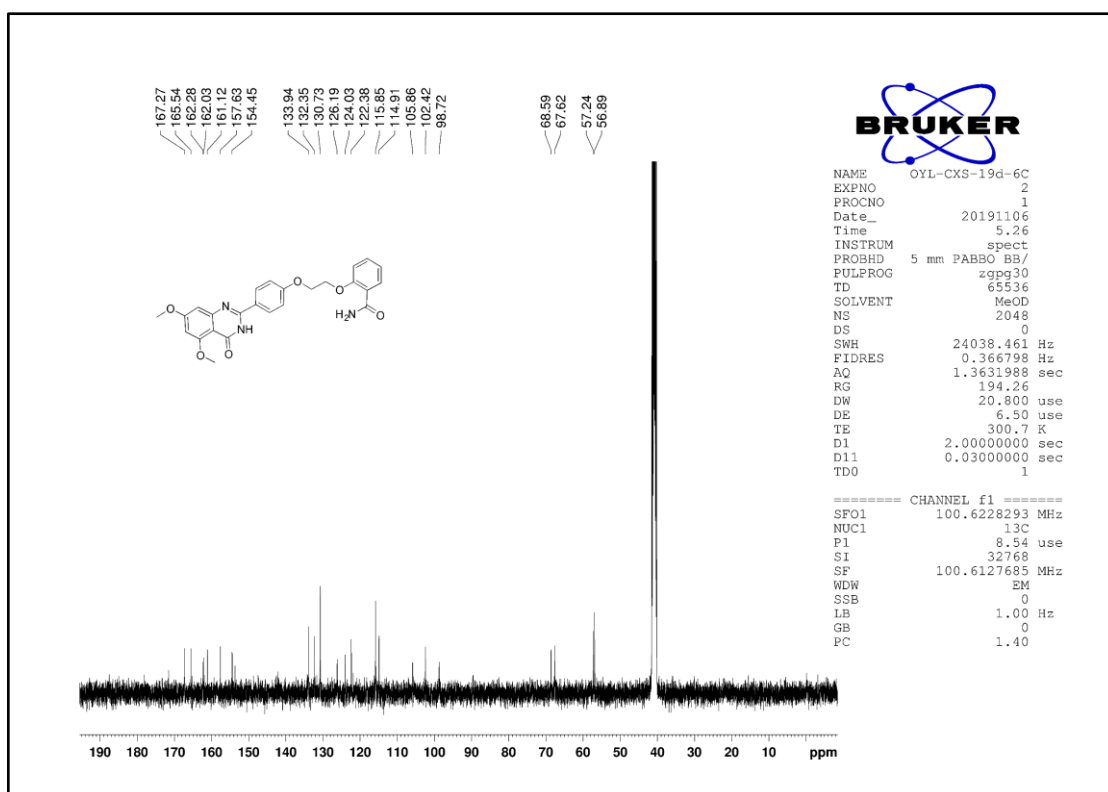

<sup>13</sup>C NMR Spectrum of Compound 19d

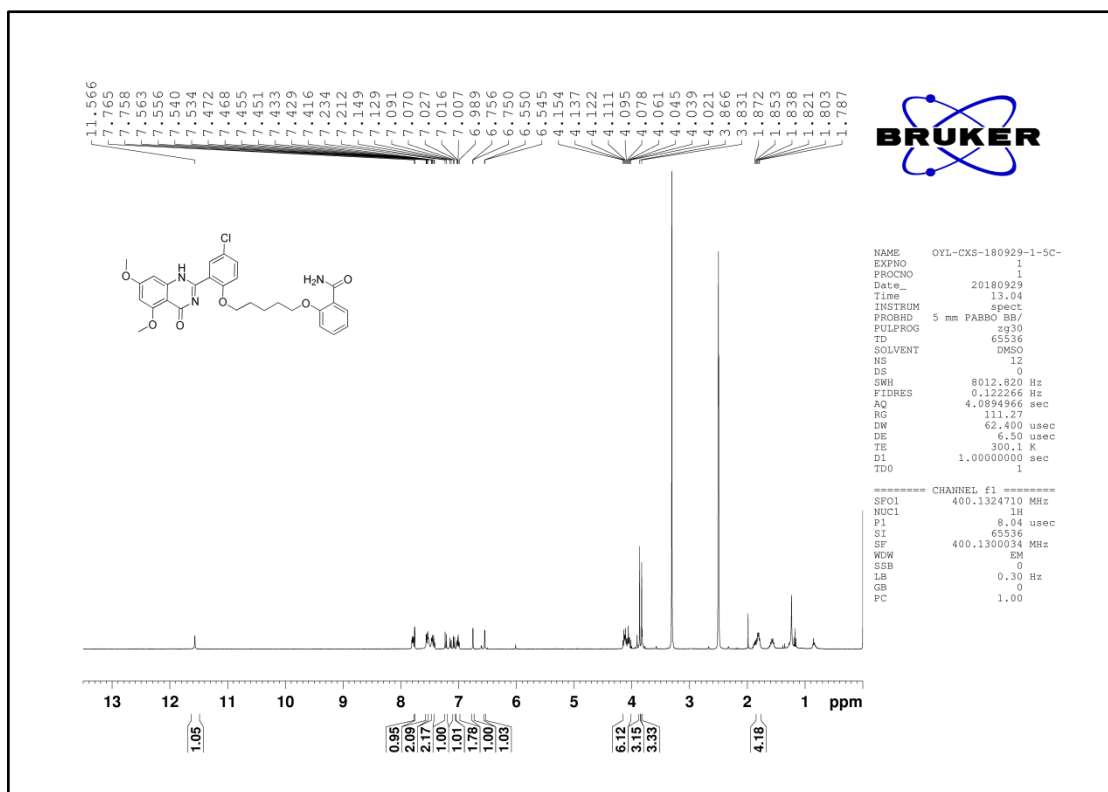

<sup>1</sup>H NMR Spectrum of Compound 19e

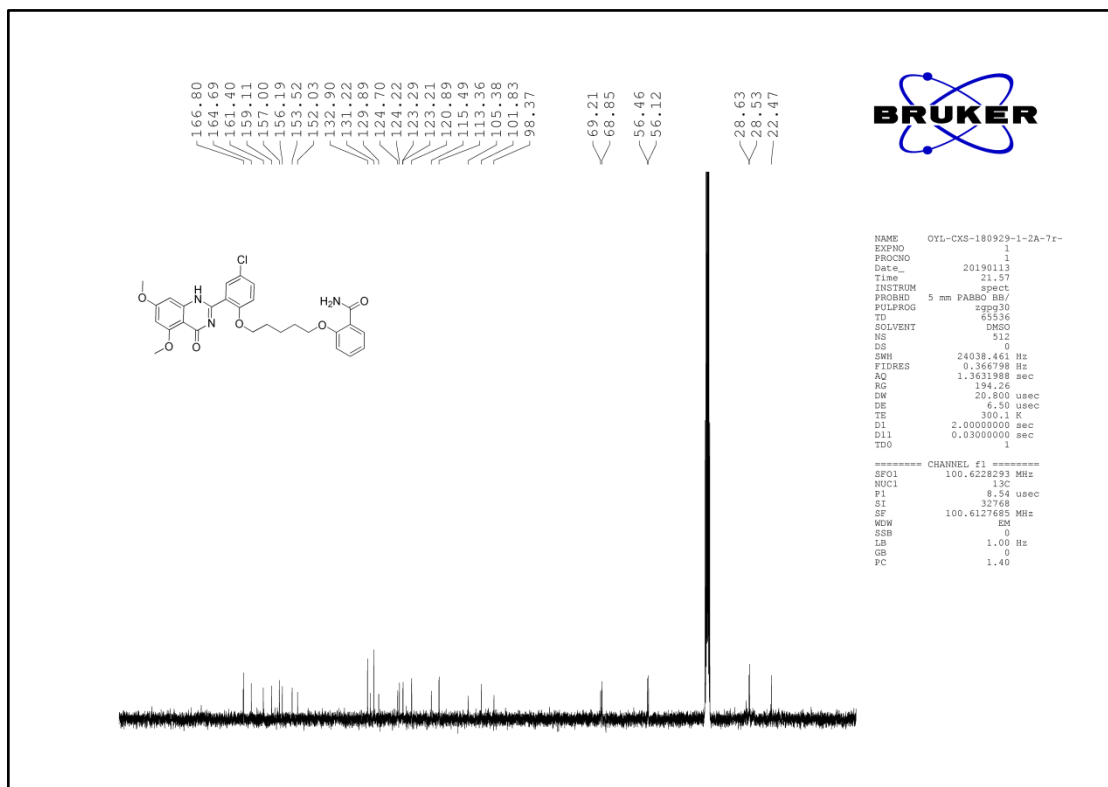

<sup>13</sup>C NMR Spectrum of Compound 19e

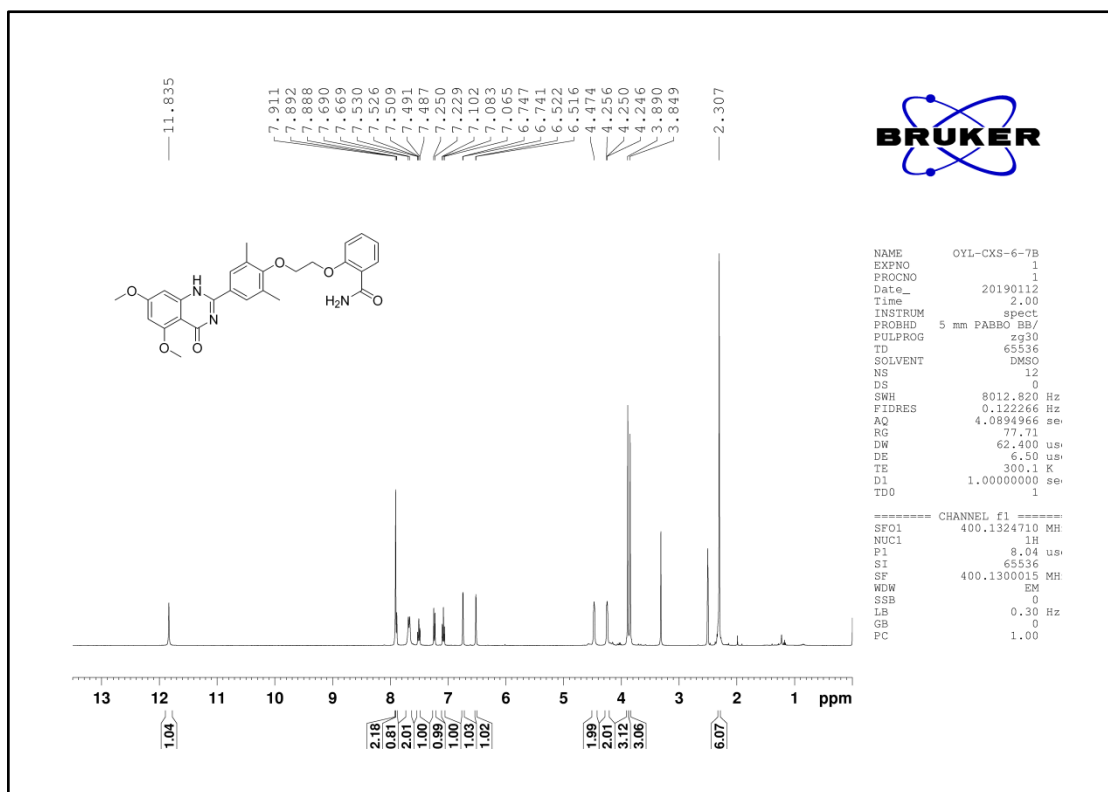

<sup>1</sup>H NMR Spectrum of Compound 19f

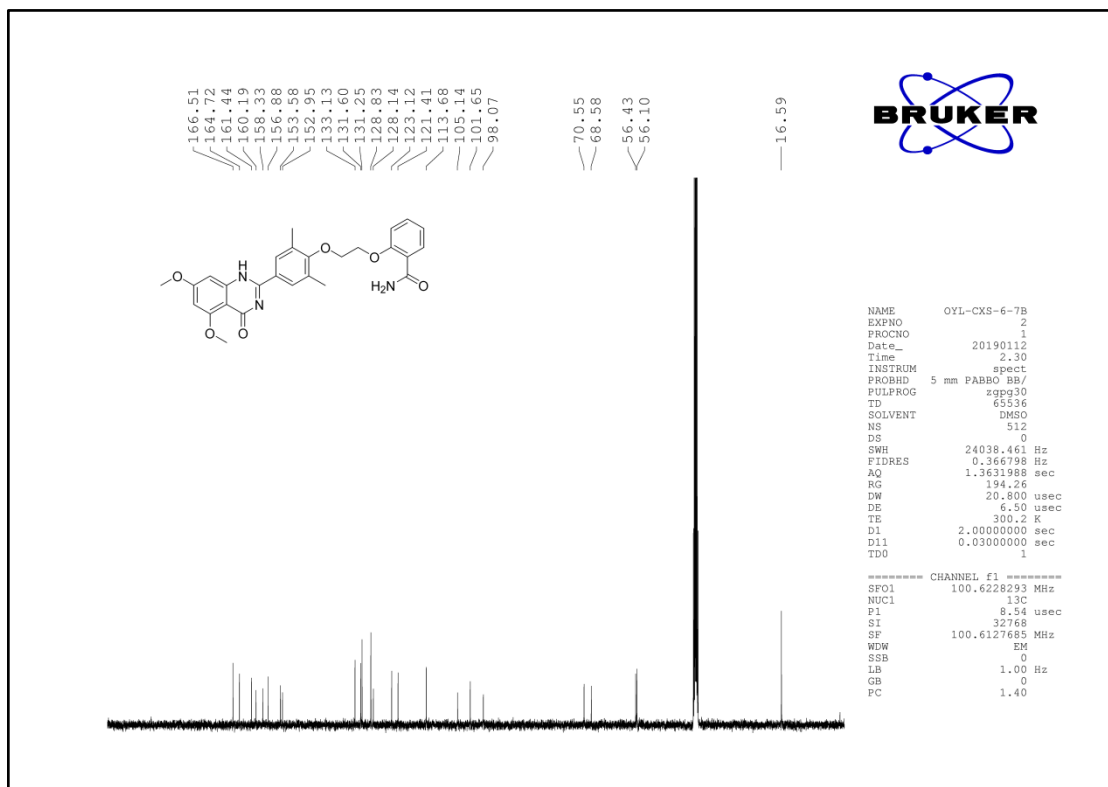

<sup>13</sup>C NMR Spectrum of Compound 19f





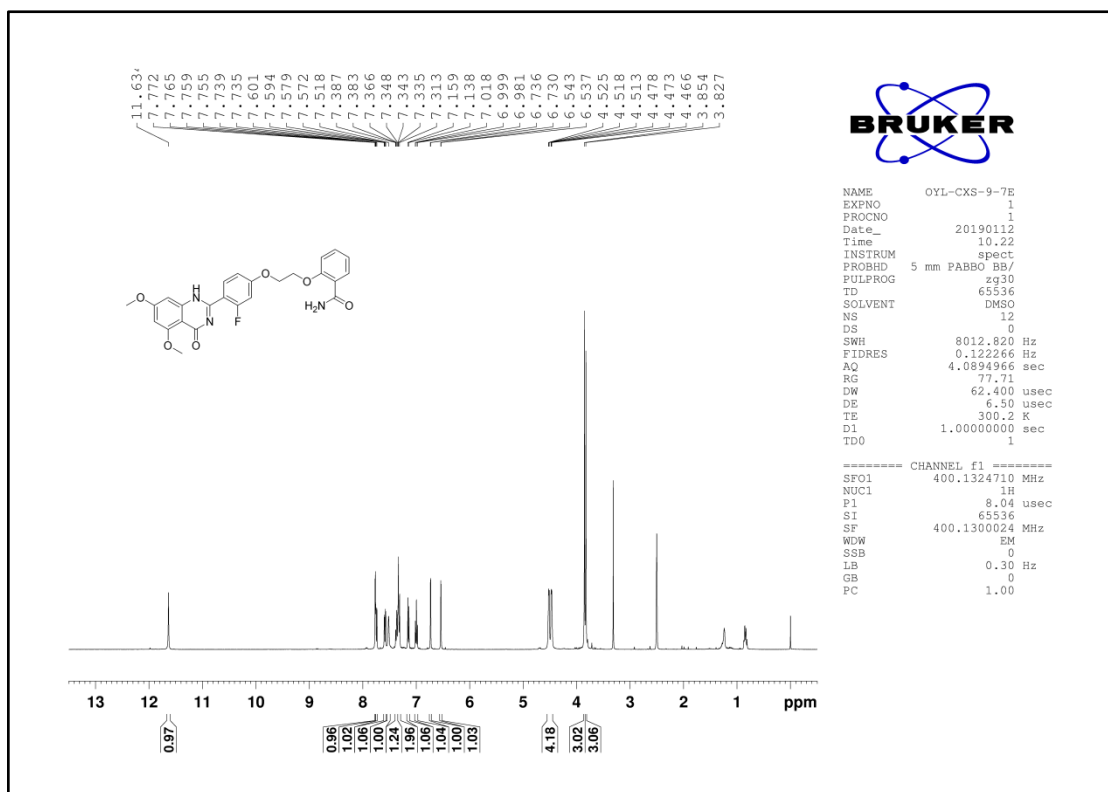

<sup>1</sup>H NMR Spectrum of Compound 19h

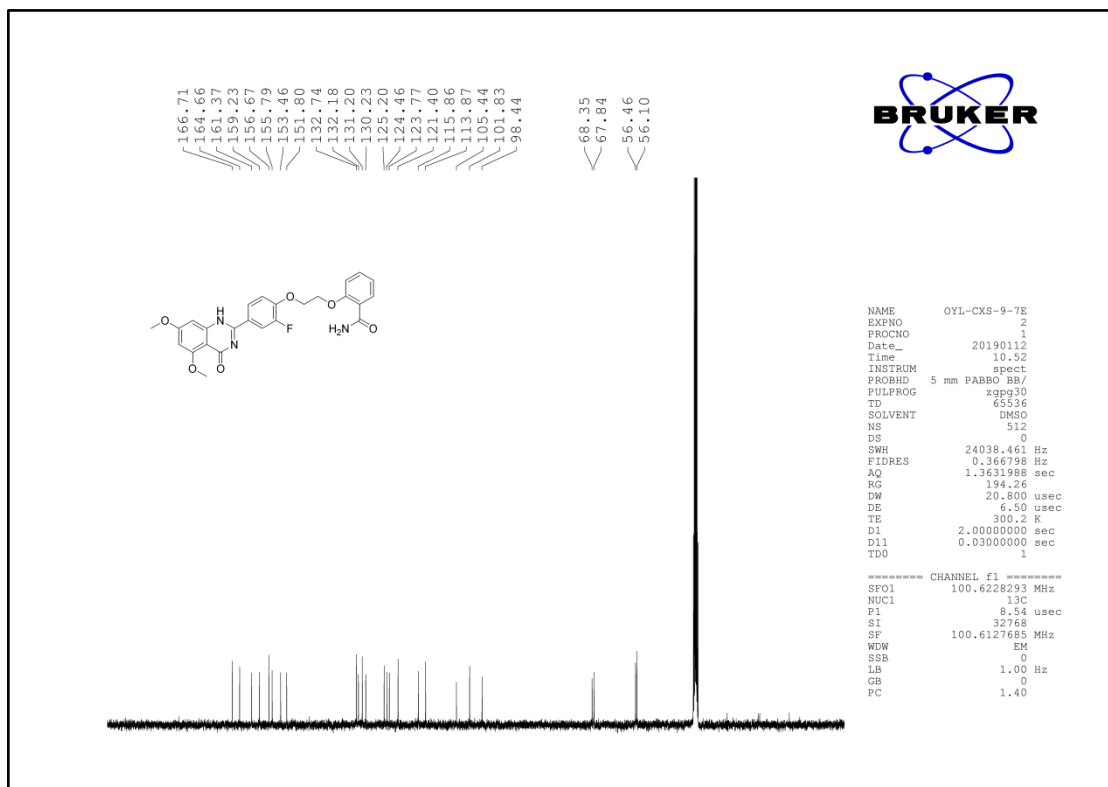

<sup>13</sup>C NMR Spectrum of Compound 19h

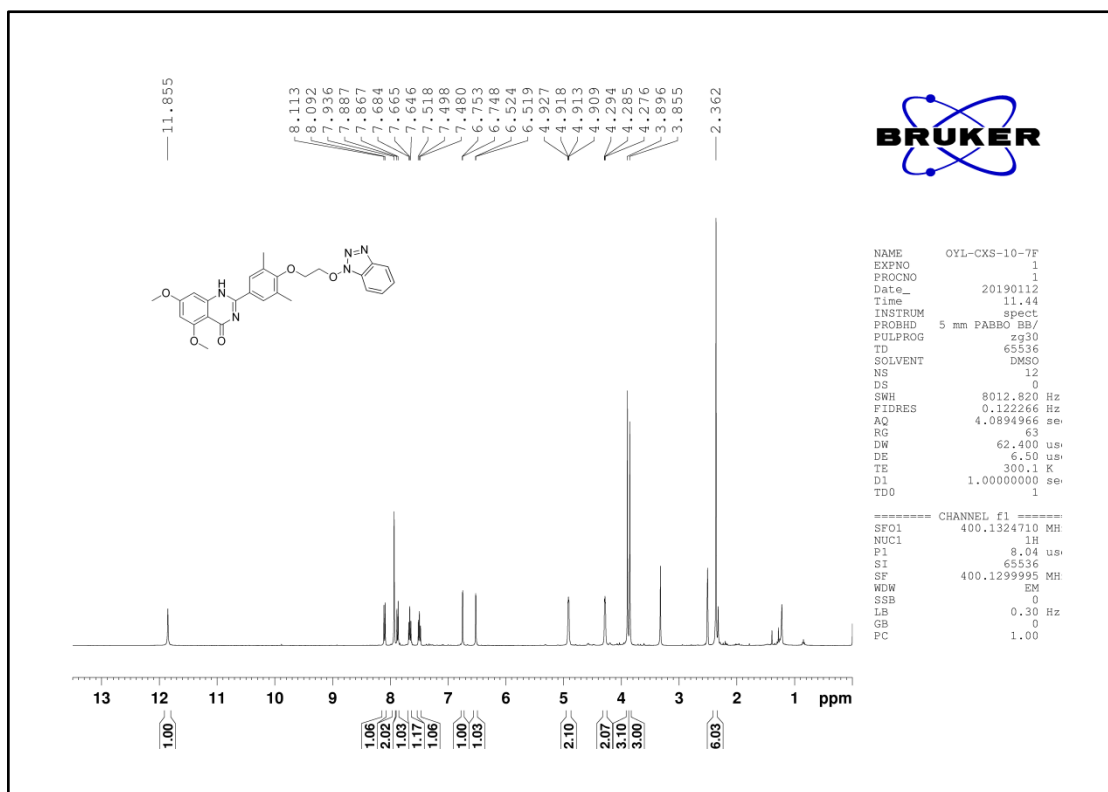

<sup>1</sup>H NMR Spectrum of Compound 19i

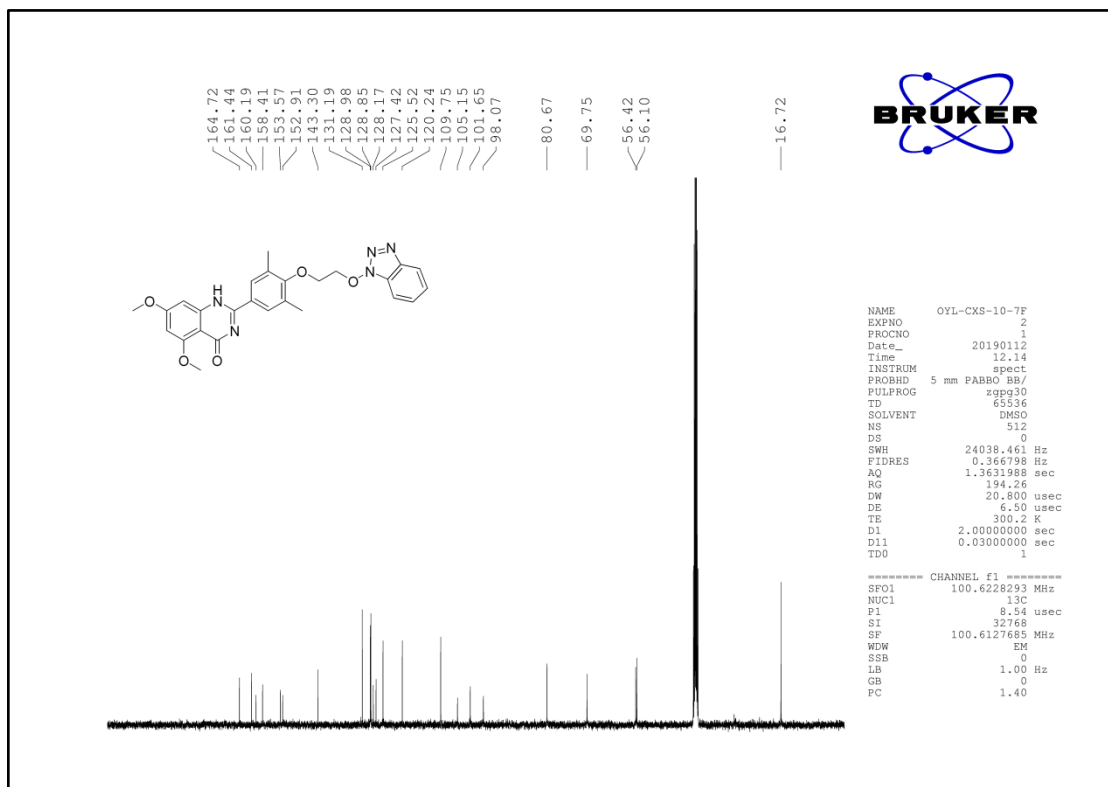

<sup>13</sup>C NMR Spectrum of Compound 19i

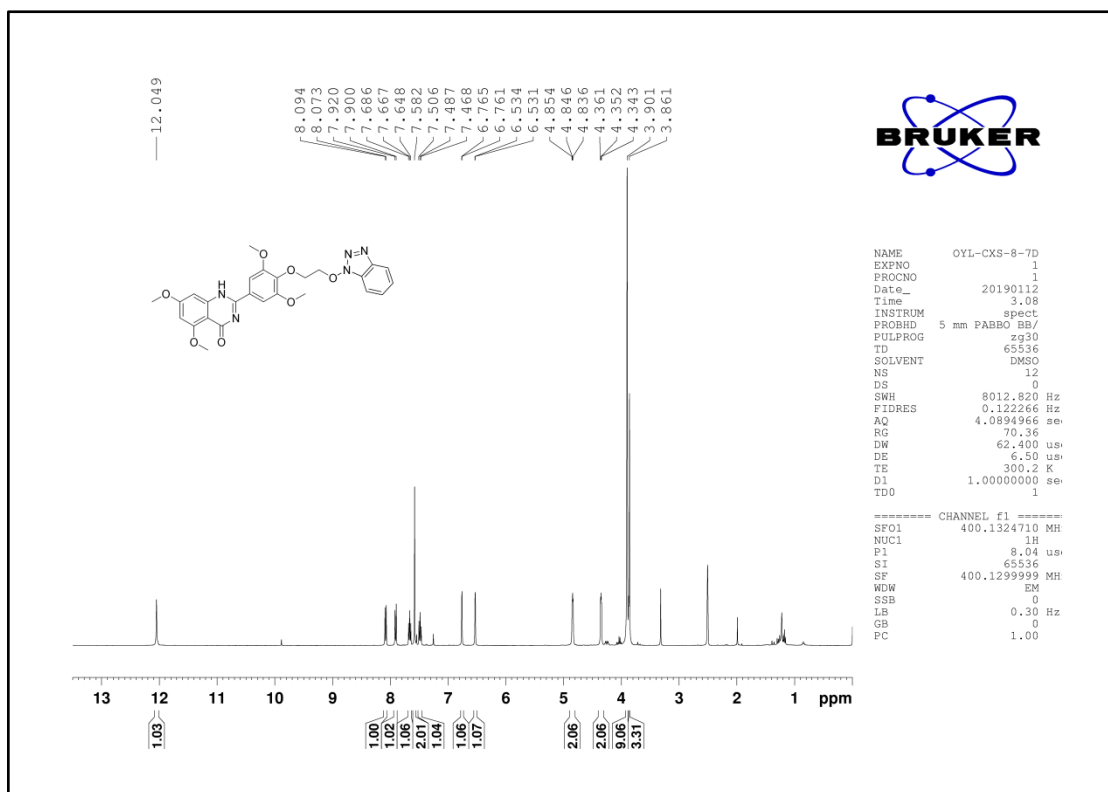

<sup>1</sup>H NMR Spectrum of Compound 19j

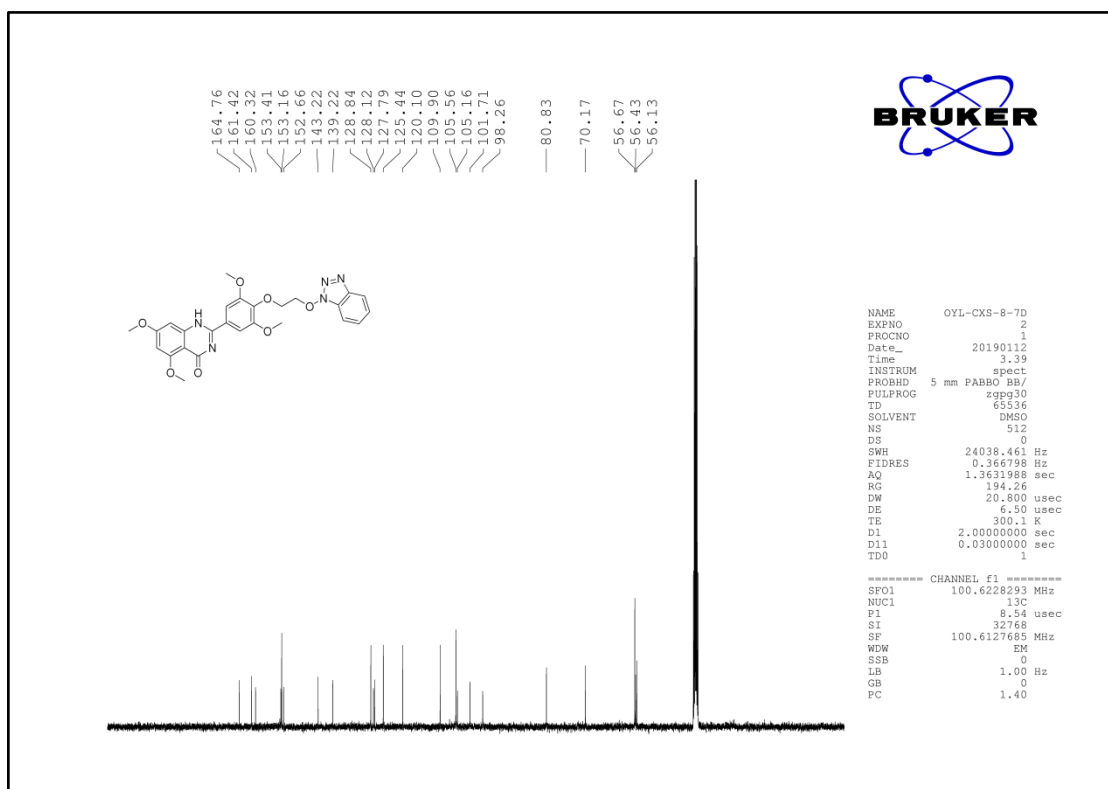

<sup>13</sup>C NMR Spectrum of Compound 19j

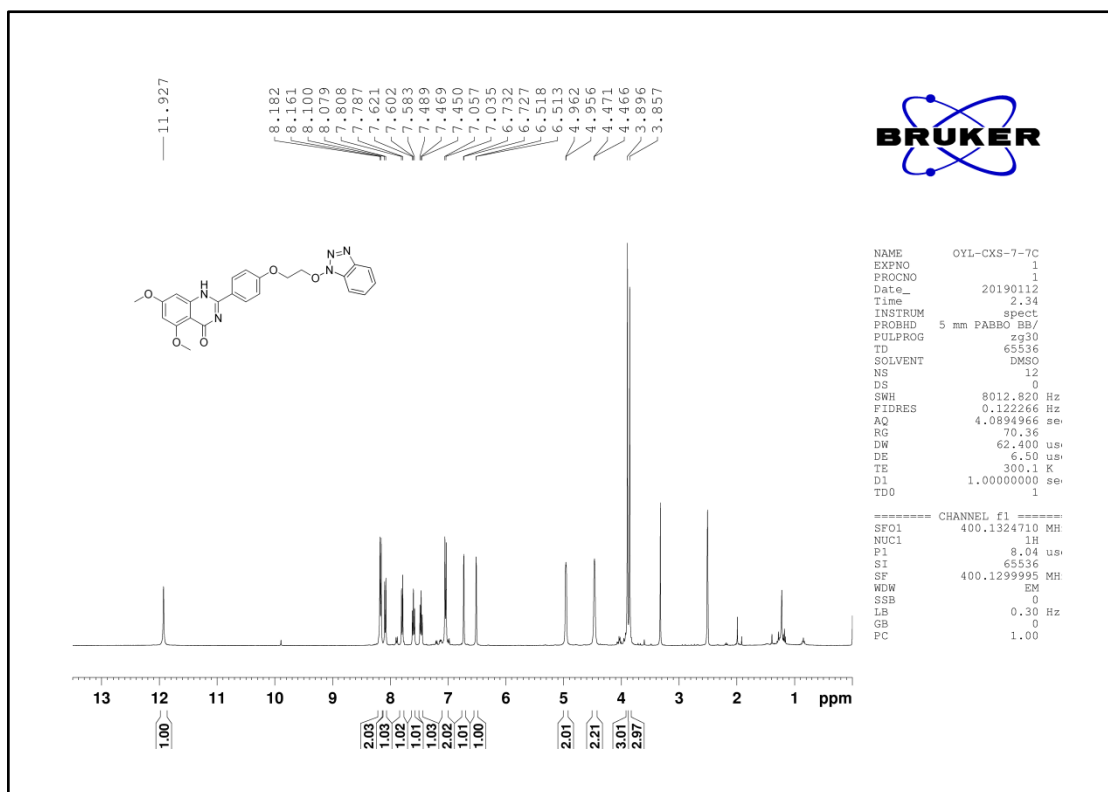

<sup>1</sup>H NMR Spectrum of Compound 19k

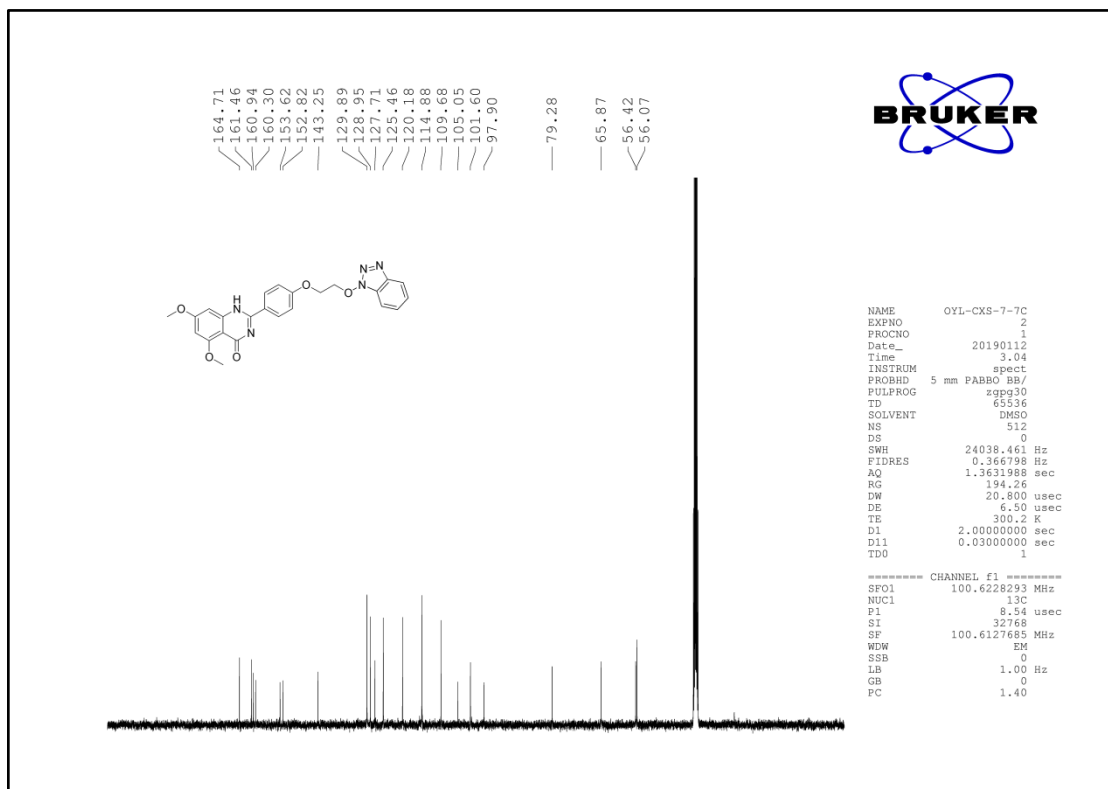

<sup>13</sup>C NMR Spectrum of Compound 19k

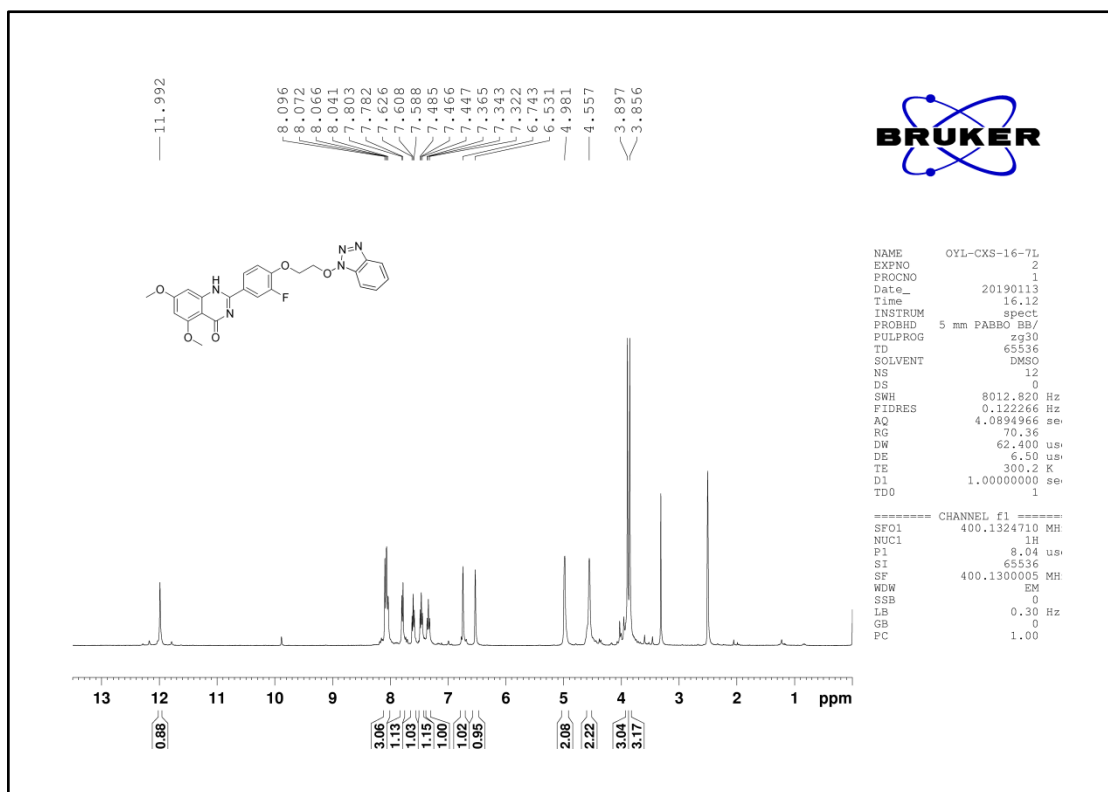

<sup>1</sup>H NMR Spectrum of Compound 191

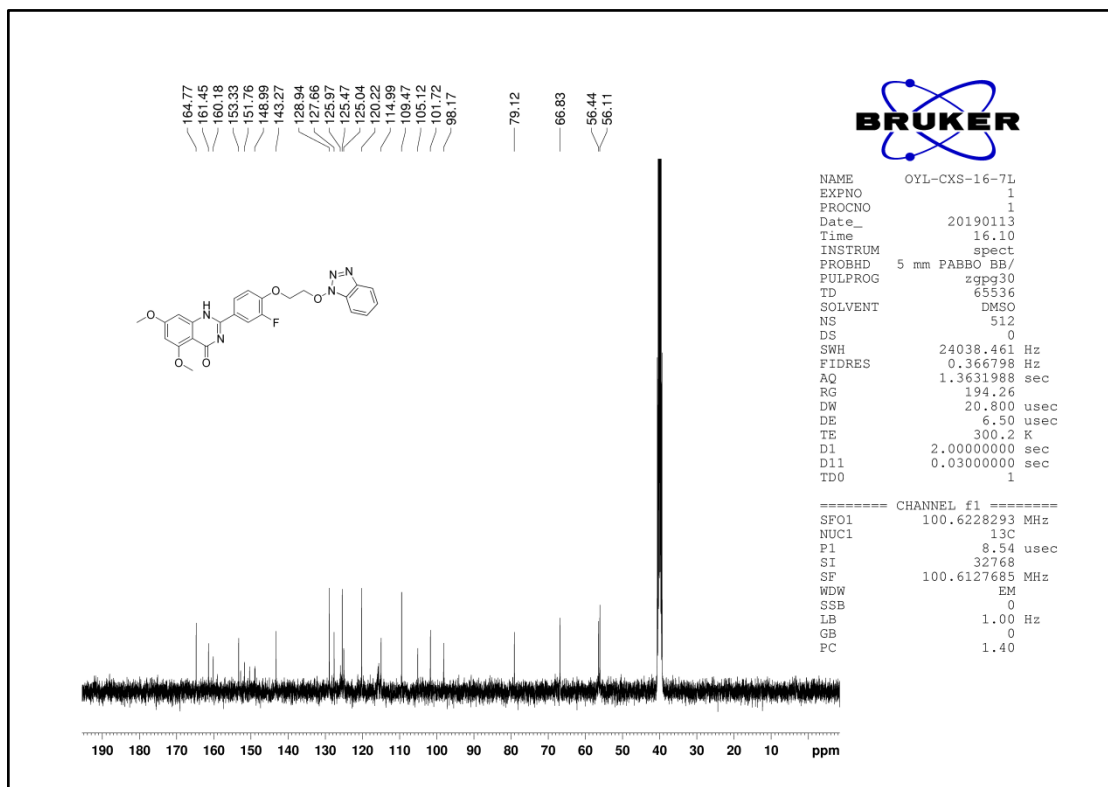

<sup>13</sup>C NMR Spectrum of Compound 191

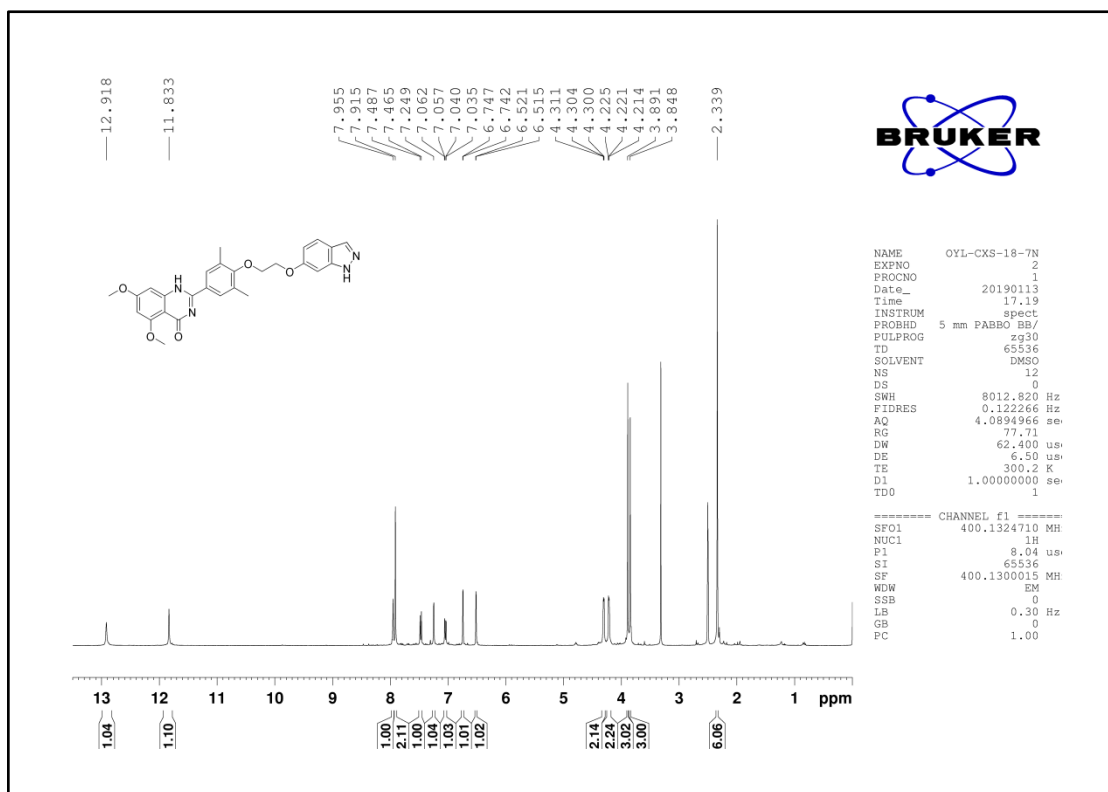

**<sup>1</sup>H NMR Spectrum of Compound 19m**

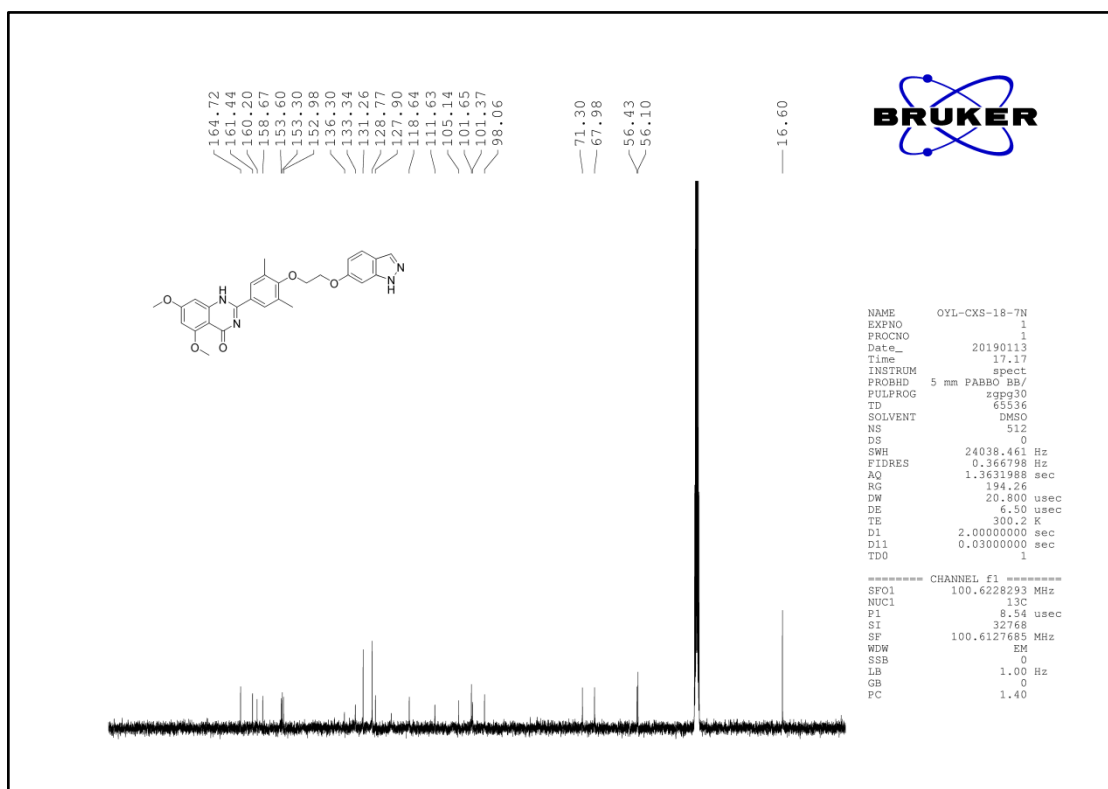

**<sup>13</sup>C NMR Spectrum of Compound 19m**

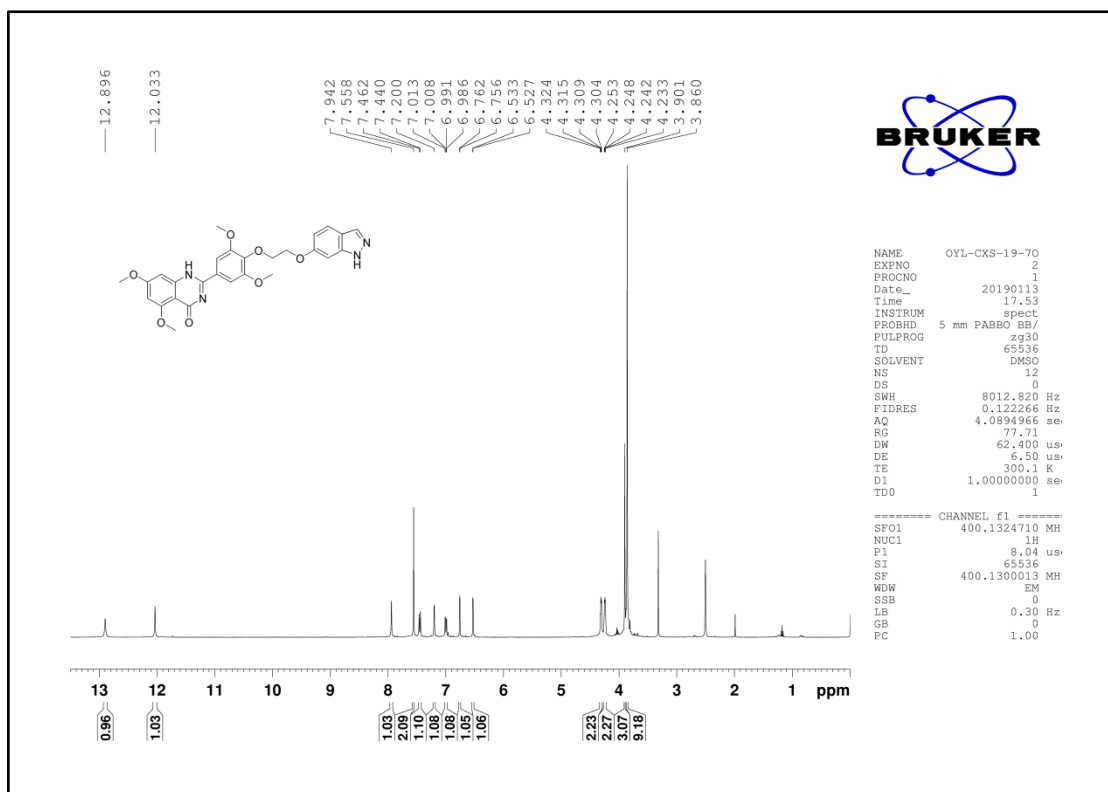

<sup>1</sup>H NMR Spectrum of Compound 19n

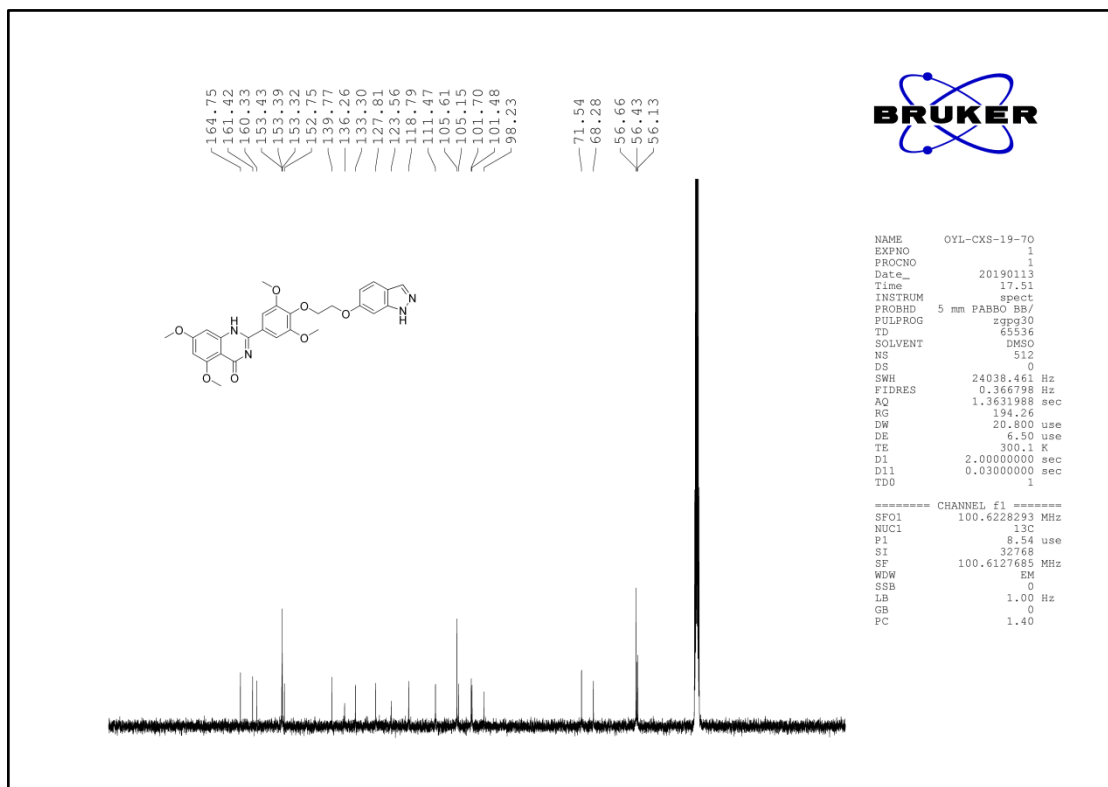

<sup>13</sup>C NMR Spectrum of Compound 19n



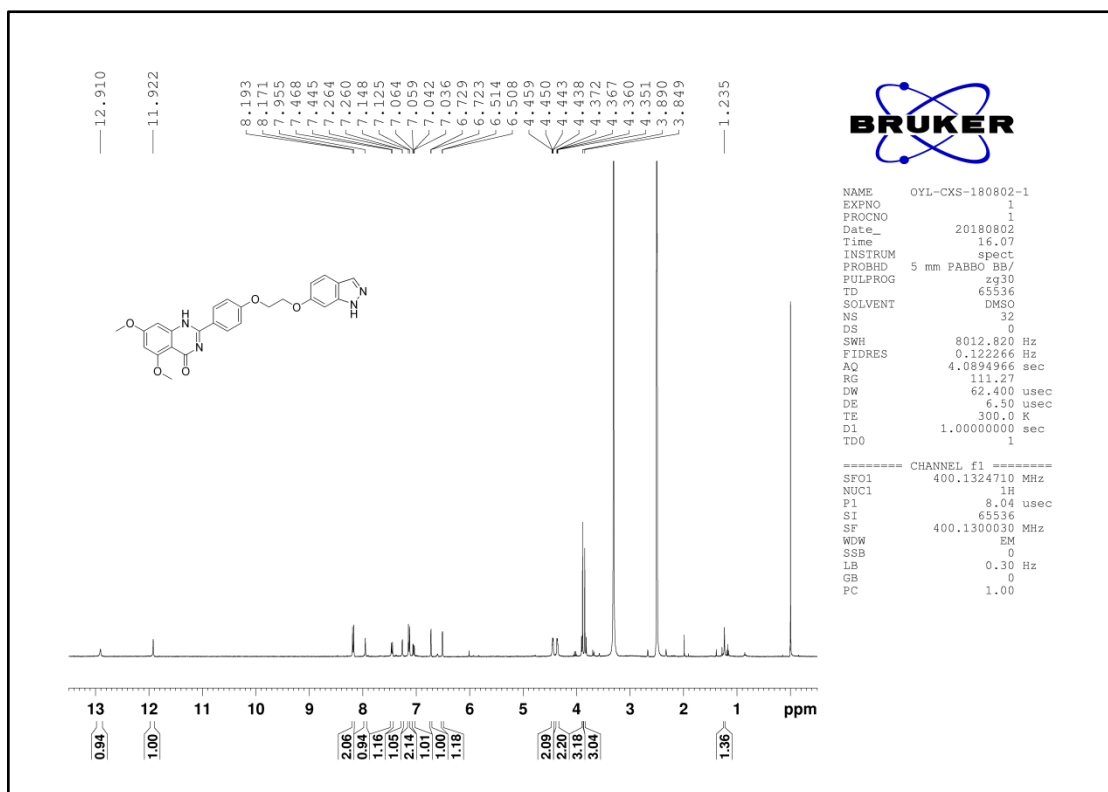

<sup>1</sup>H NMR Spectrum of Compound 19o

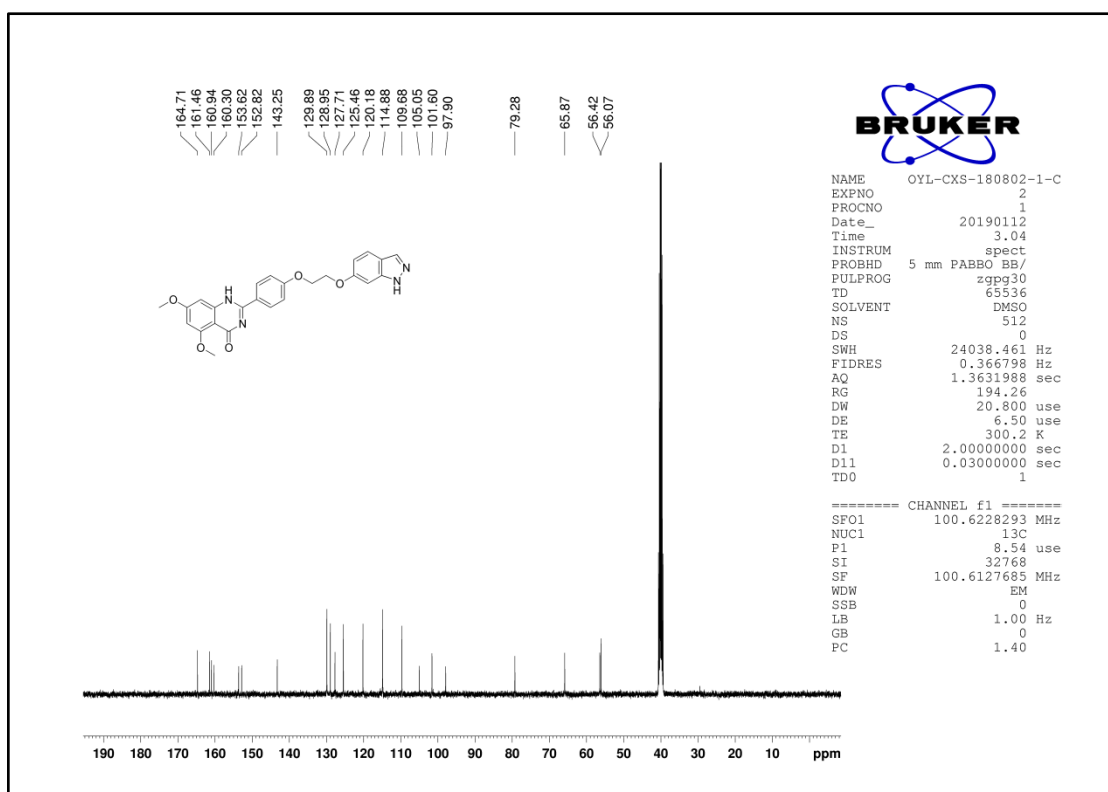

<sup>13</sup>C NMR Spectrum of Compound 19o

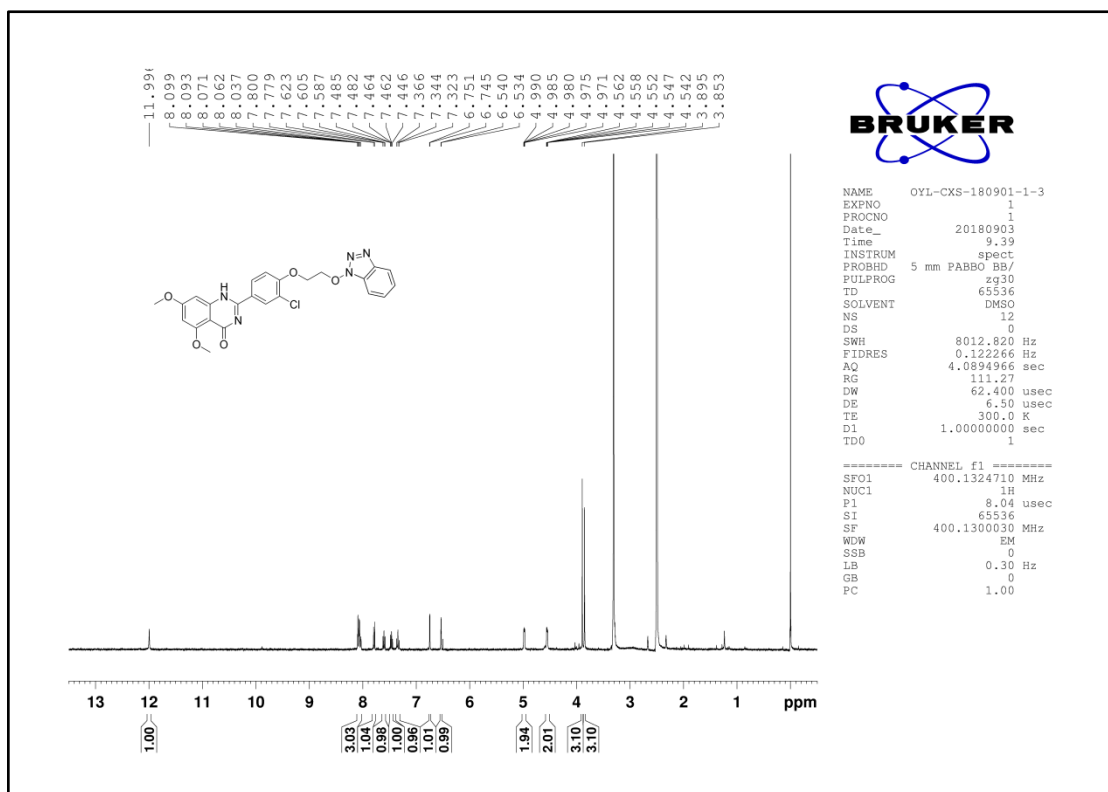

<sup>1</sup>H NMR Spectrum of Compound 19p

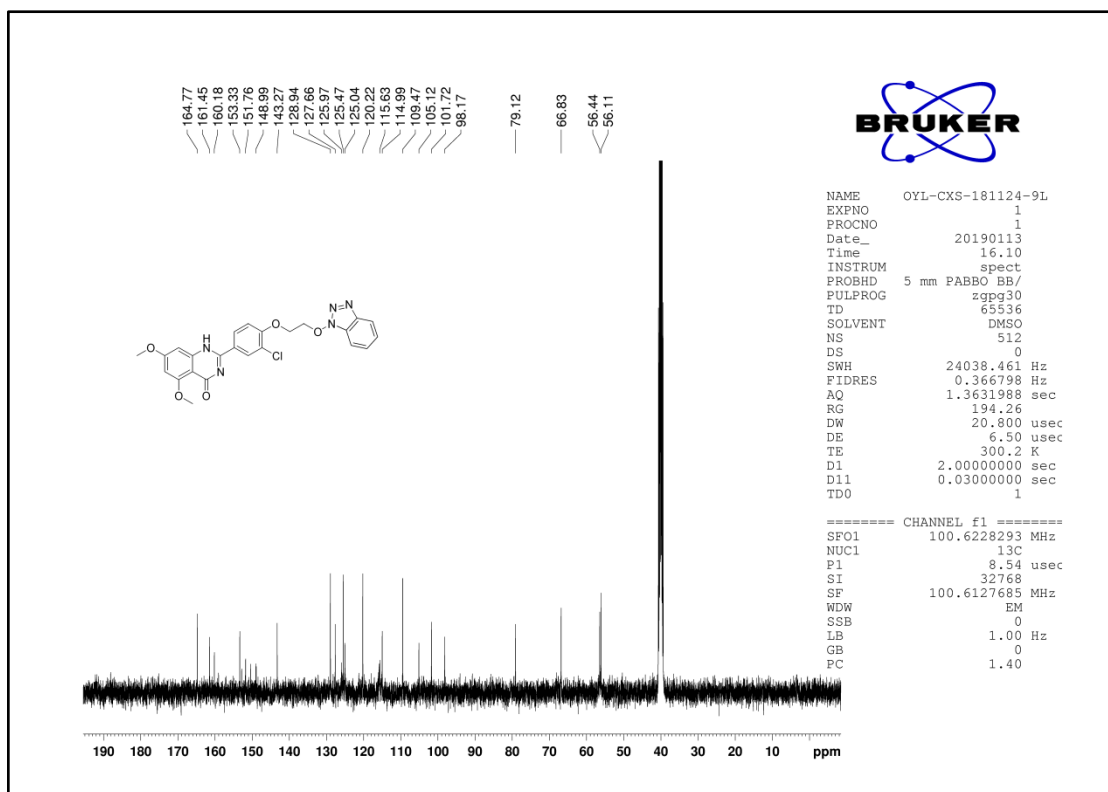

<sup>13</sup>C NMR Spectrum of Compound 19p

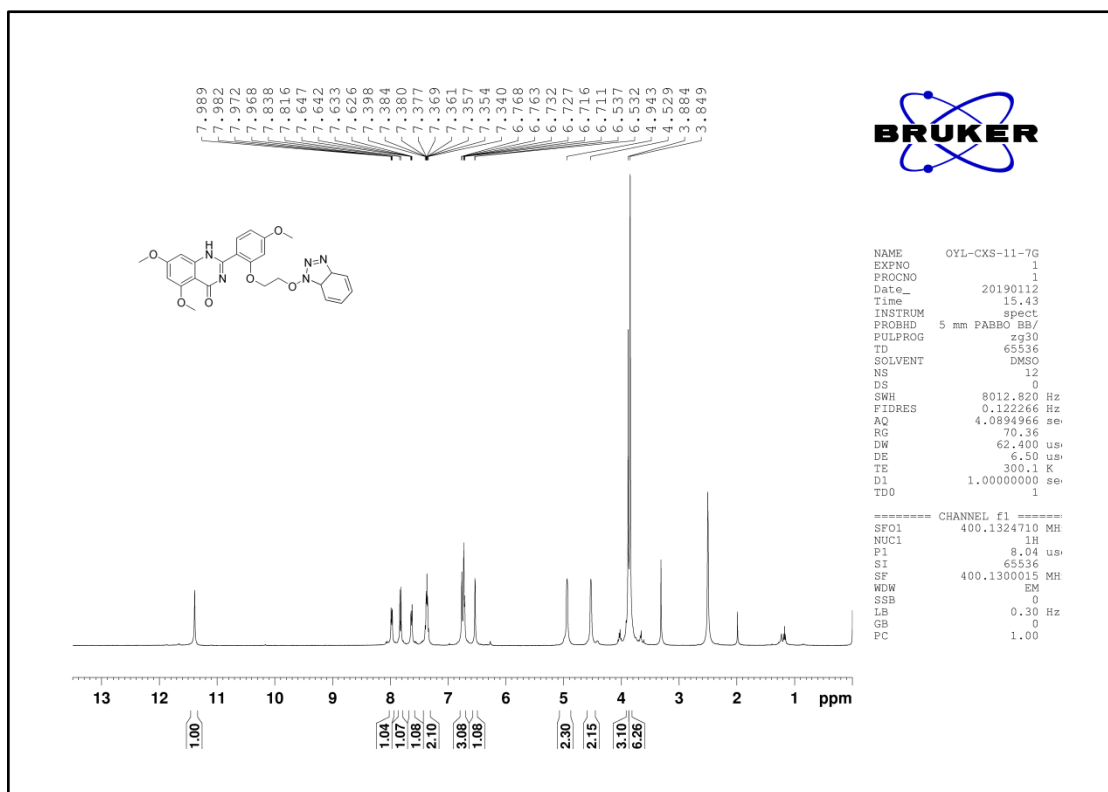

<sup>1</sup>H NMR Spectrum of Compound 19q

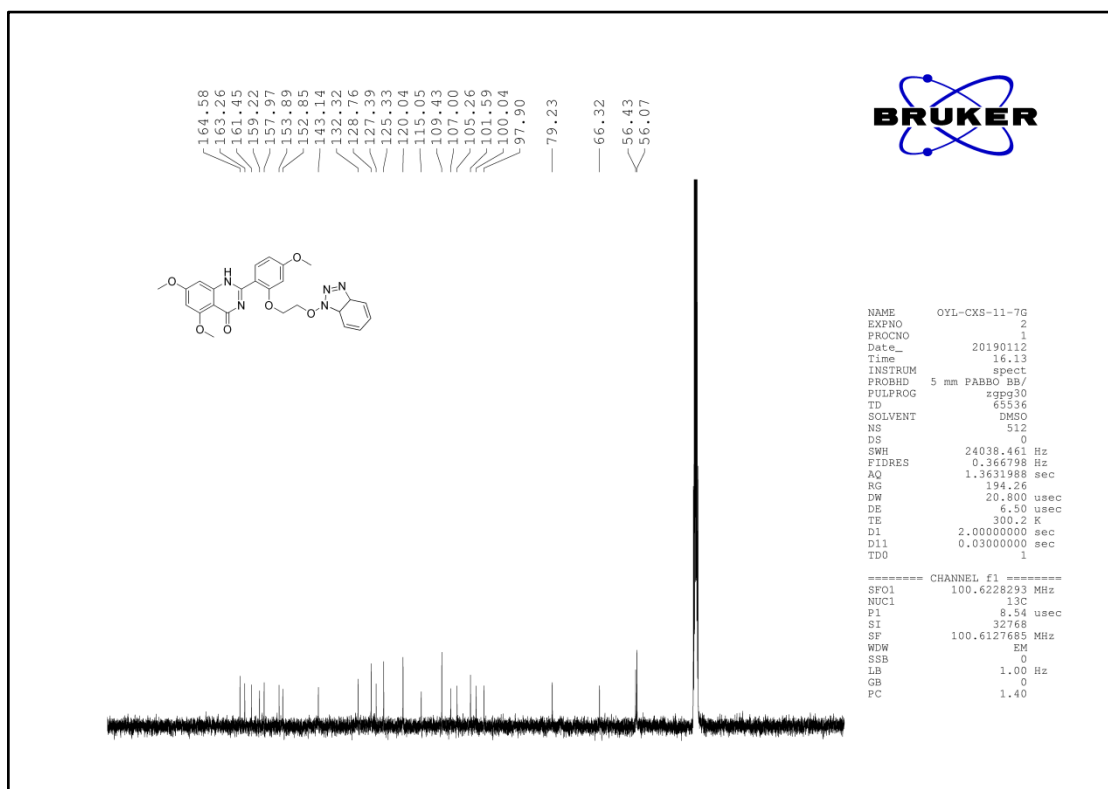

<sup>13</sup>C NMR Spectrum of Compound 19q

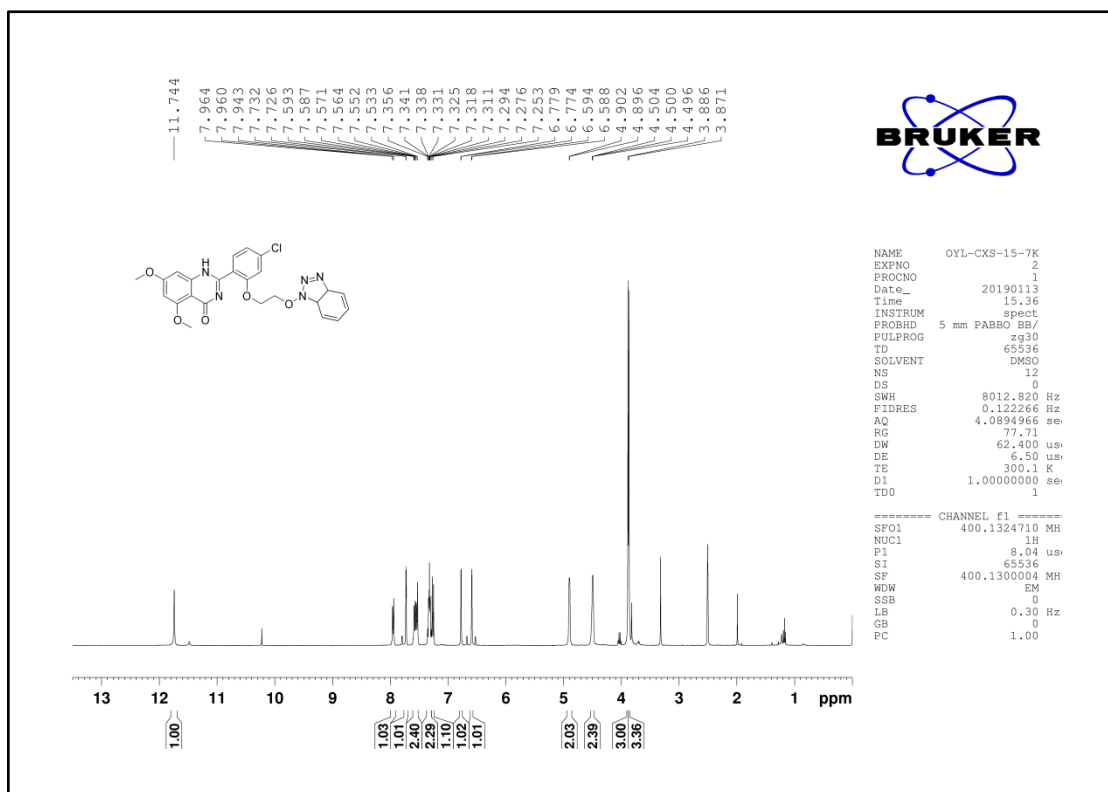

<sup>1</sup>H NMR Spectrum of Compound 19r

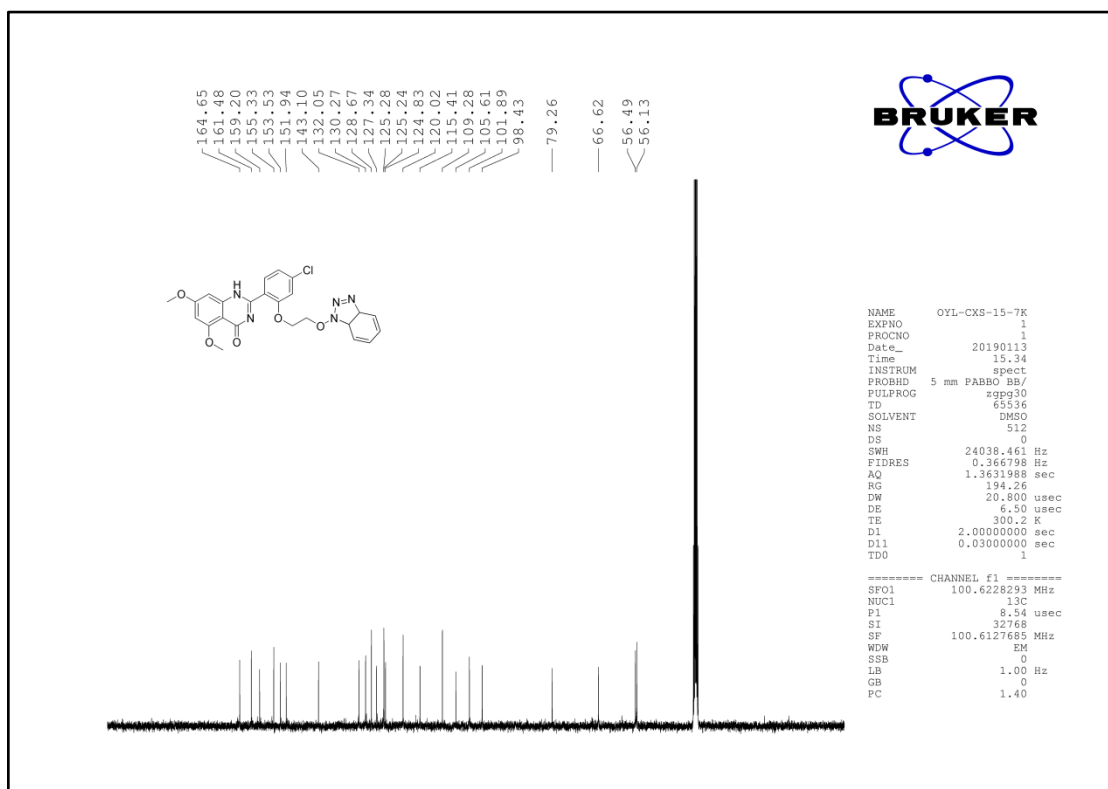

<sup>13</sup>C NMR Spectrum of Compound 19r

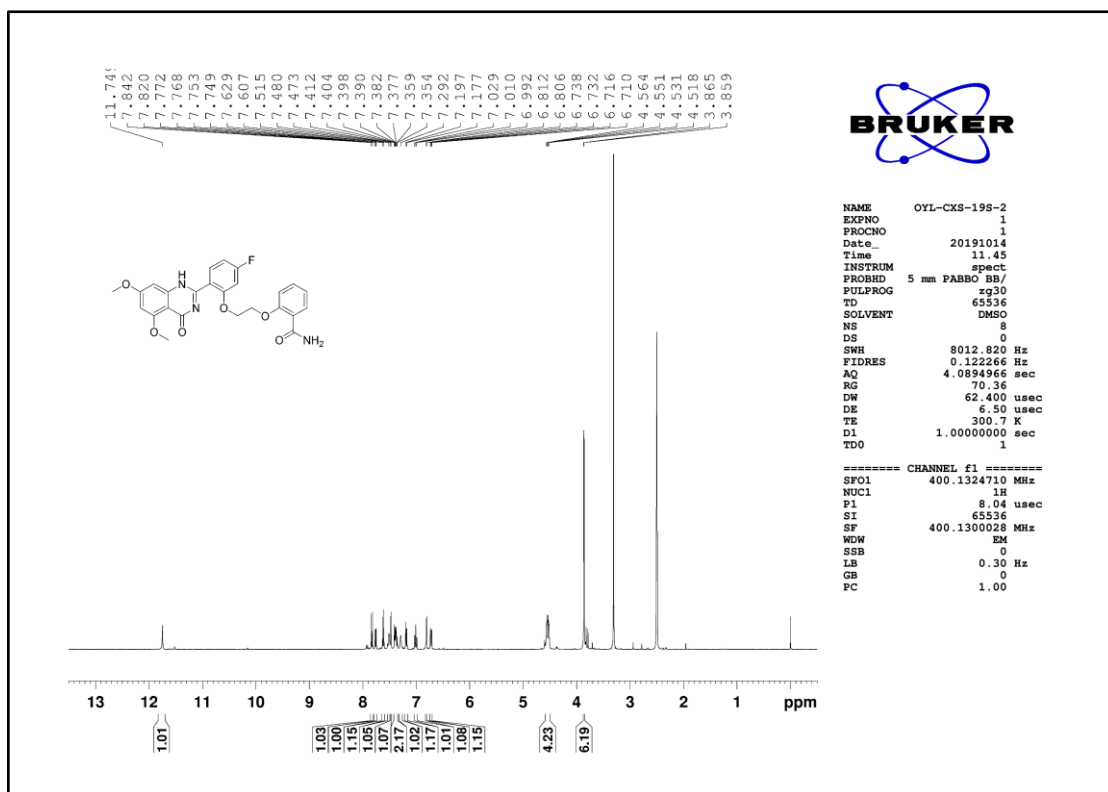

<sup>1</sup>H NMR Spectrum of Compound 19s

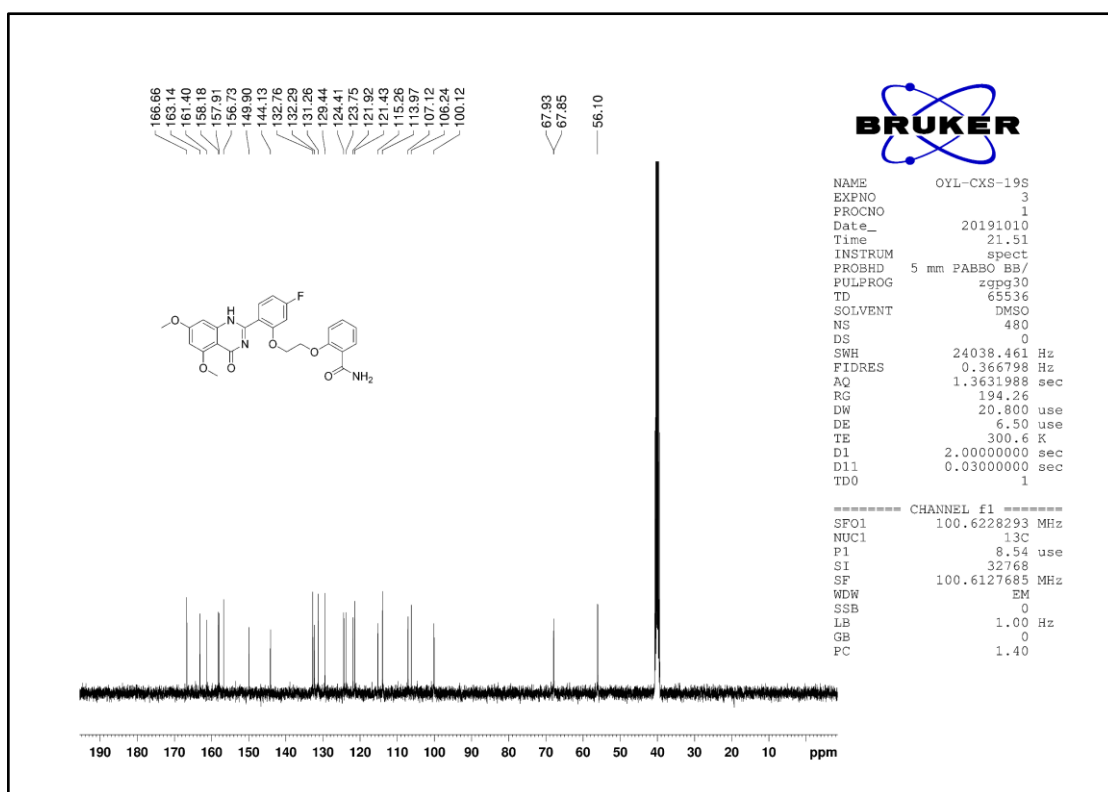

<sup>13</sup>C NMR Spectrum of Compound 19s

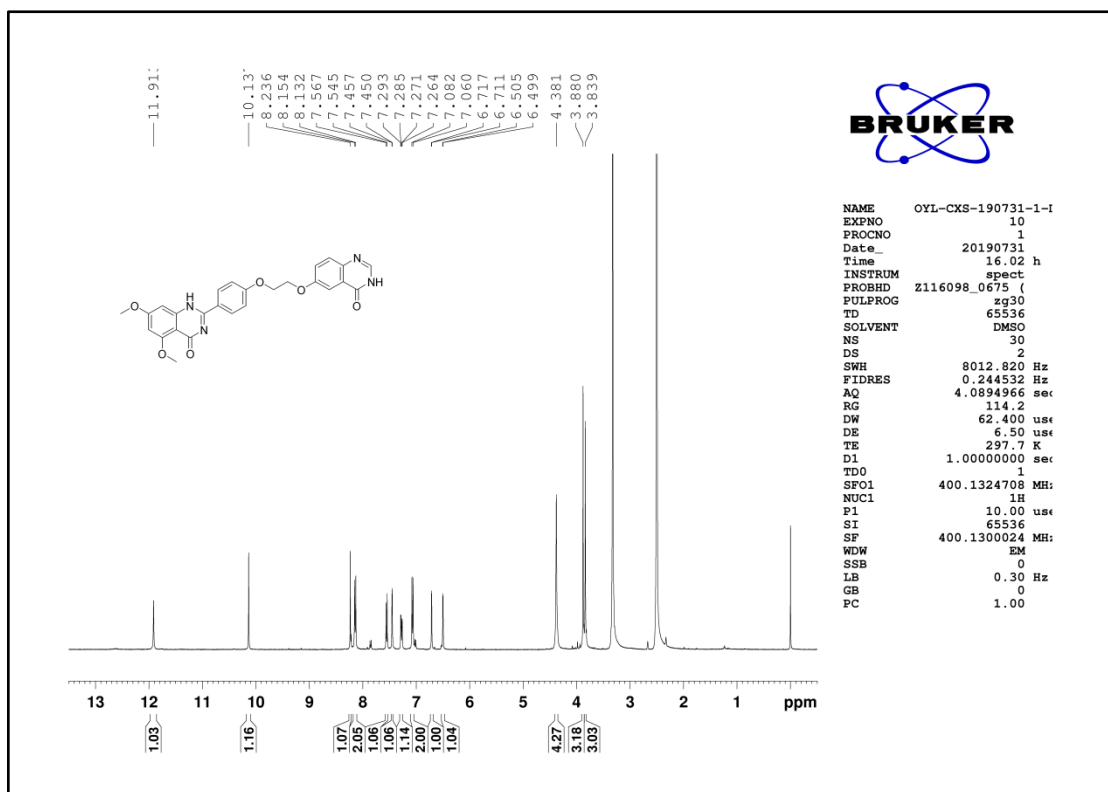

<sup>1</sup>H NMR Spectrum of Compound 19t

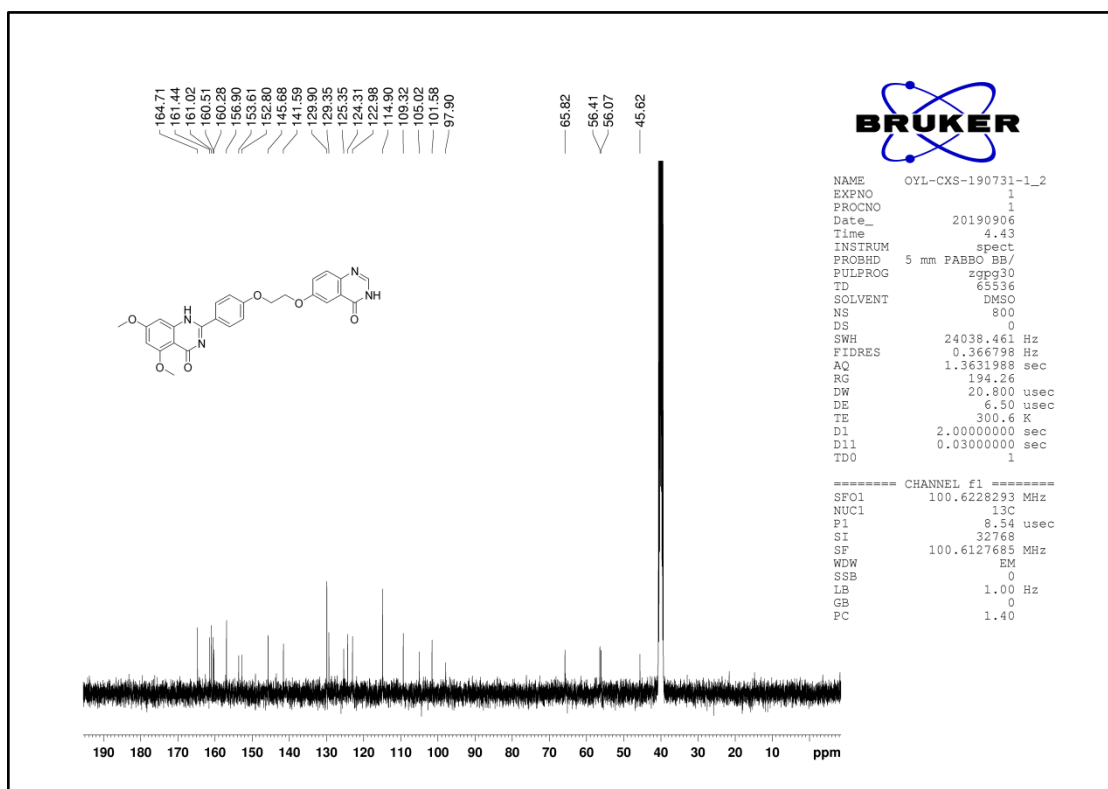

<sup>13</sup>C NMR Spectrum of Compound 19t

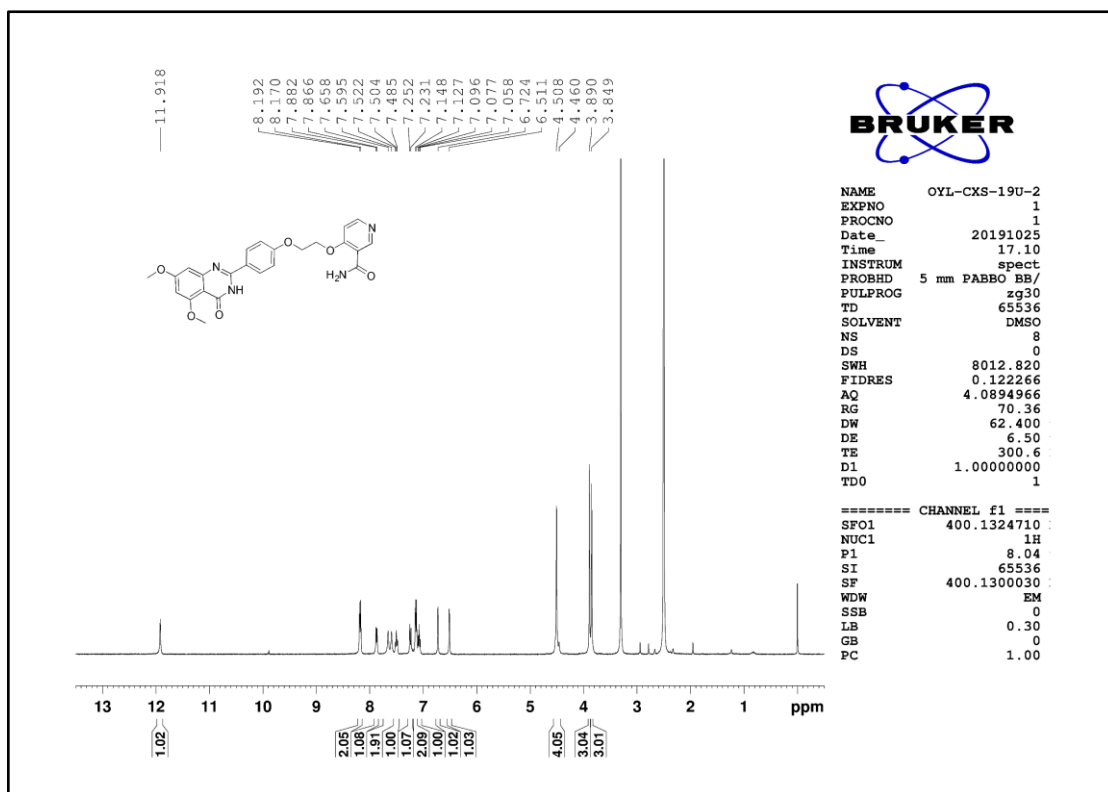

<sup>1</sup>H NMR Spectrum of Compound 19u

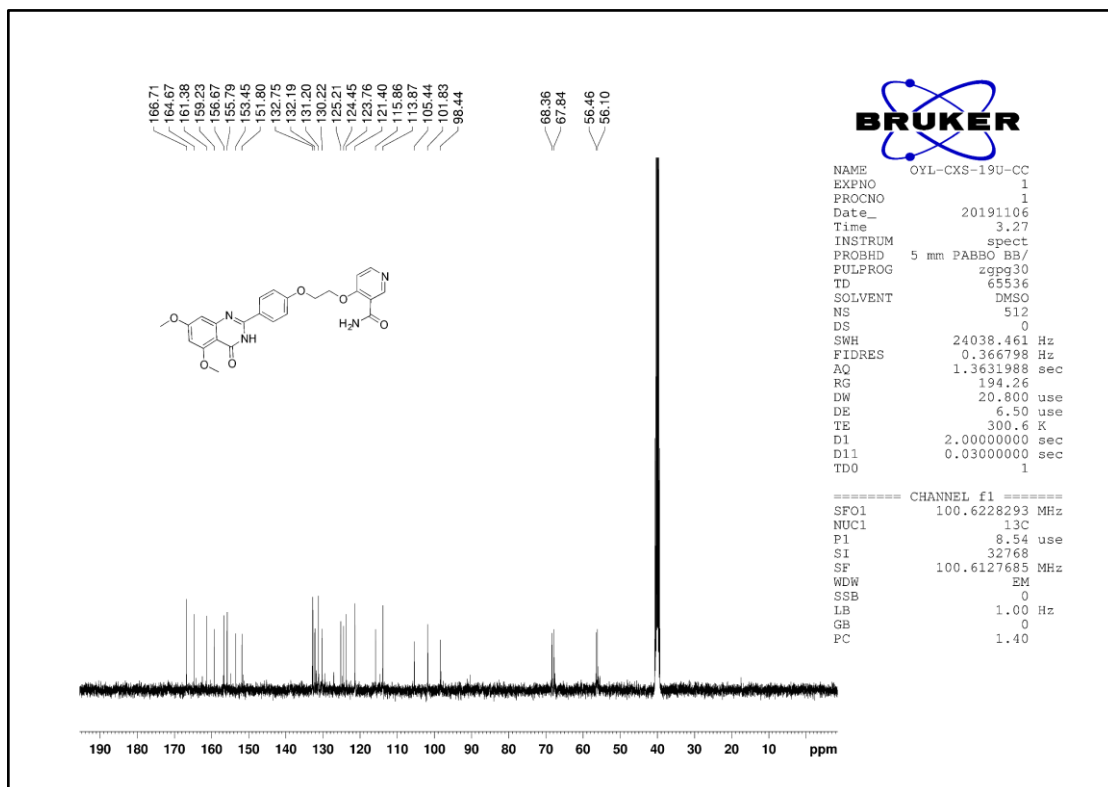

<sup>13</sup>C NMR Spectrum of Compound 19u

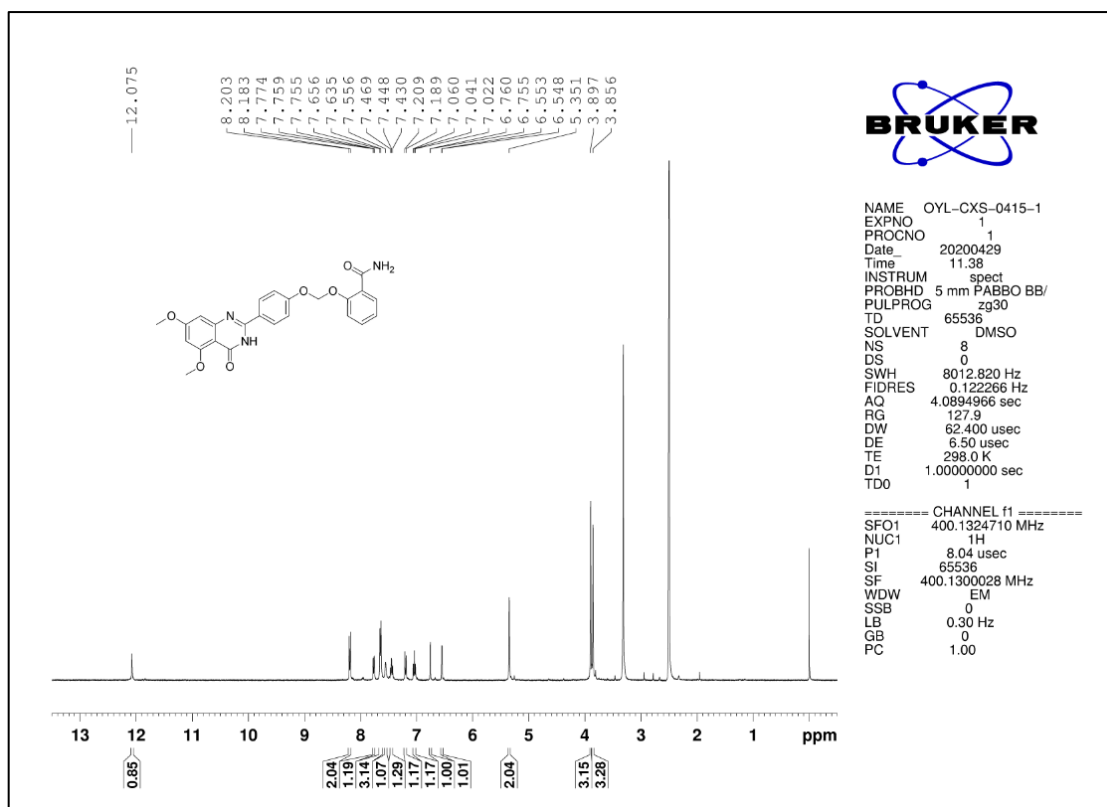

<sup>1</sup>H NMR Spectrum of Compound 19v

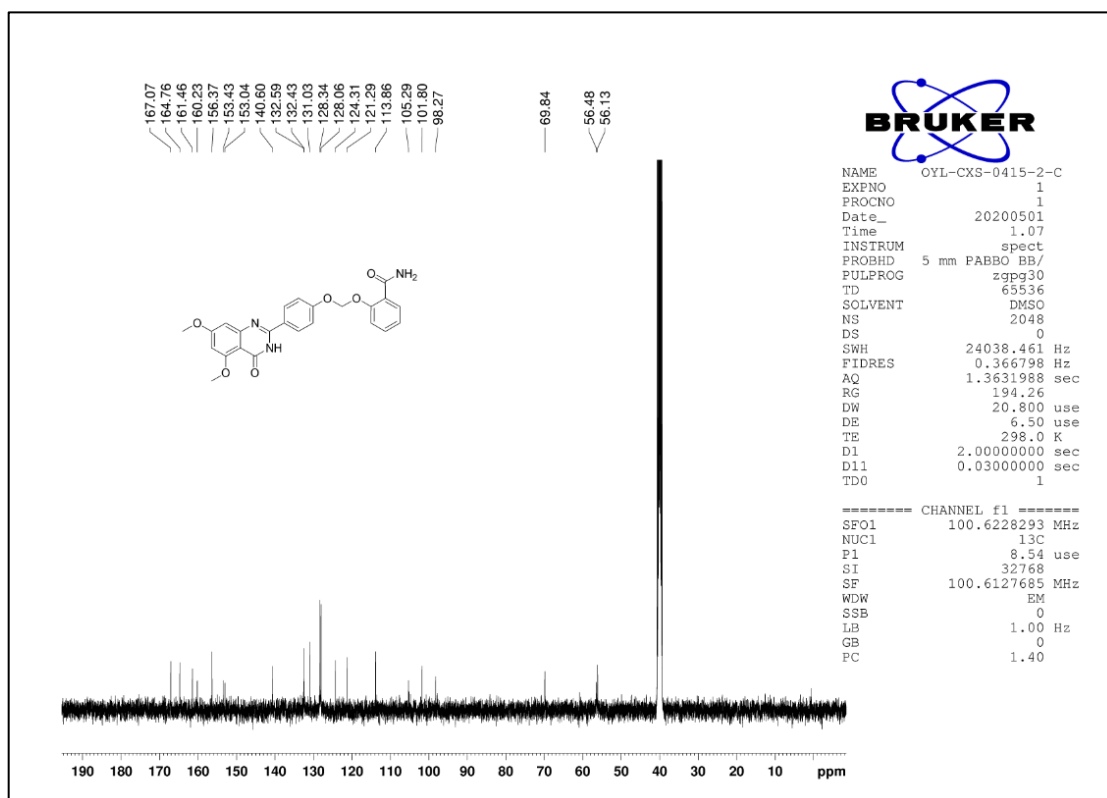

<sup>13</sup>C NMR Spectrum of Compound 19v



### 3. Representative HPLC traces of biologically tested compounds

compound 5a

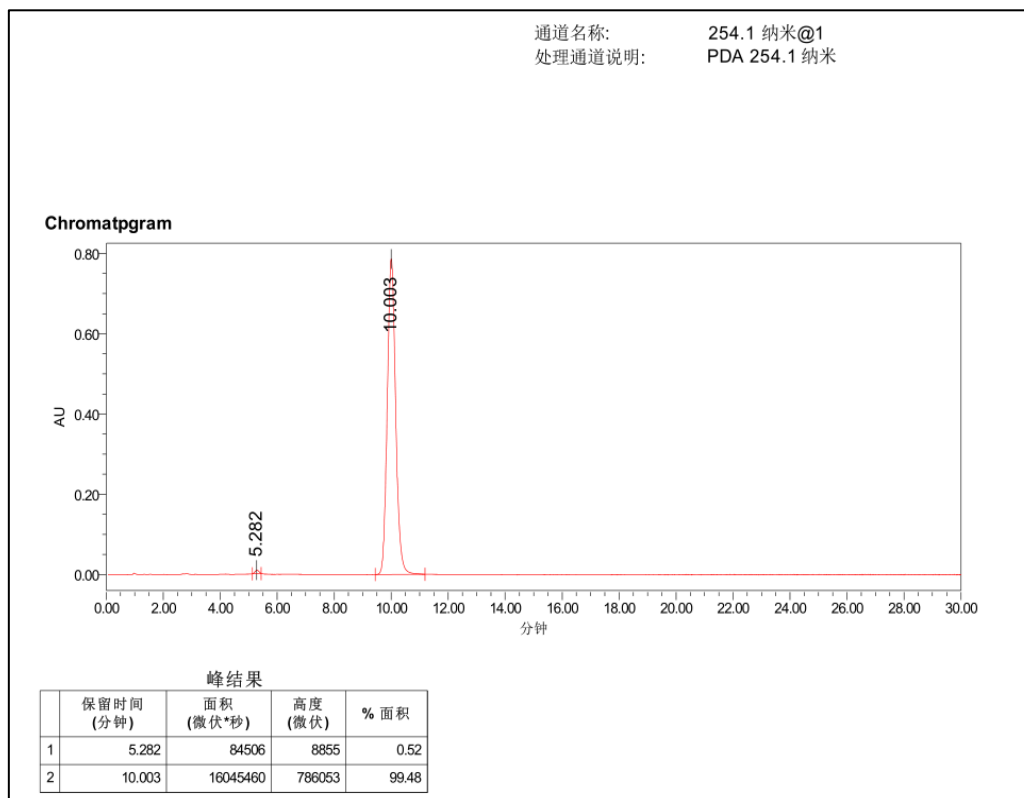

compound 5b

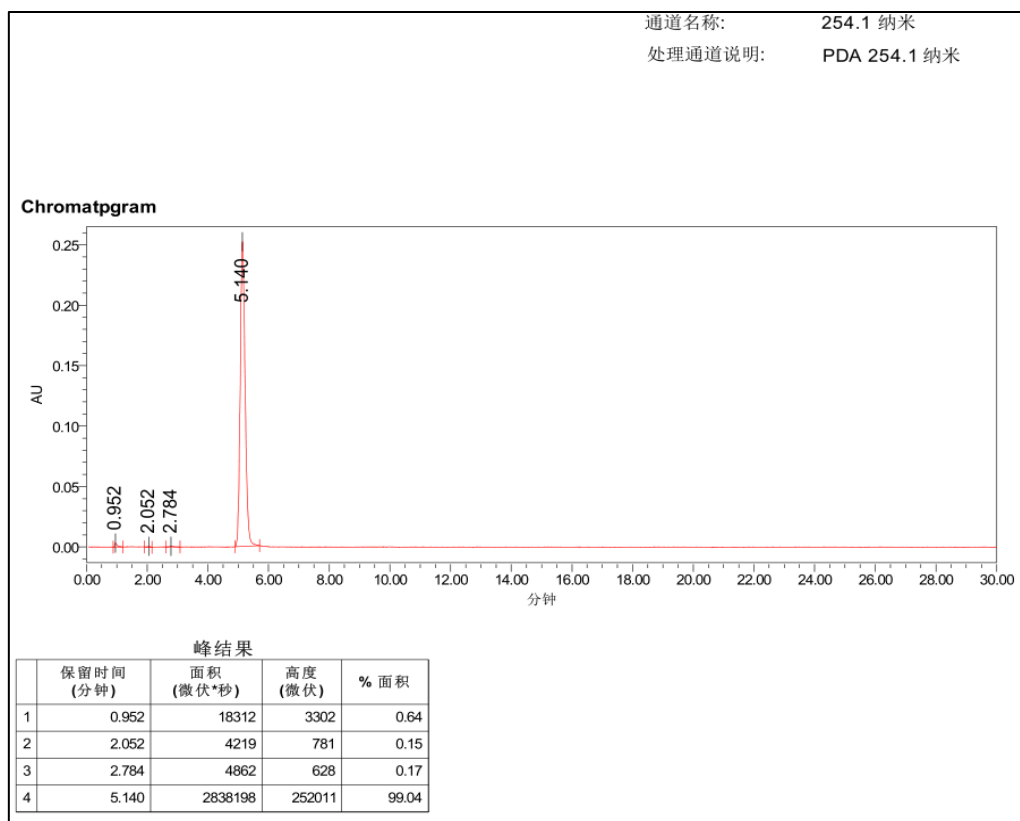

compound 5c

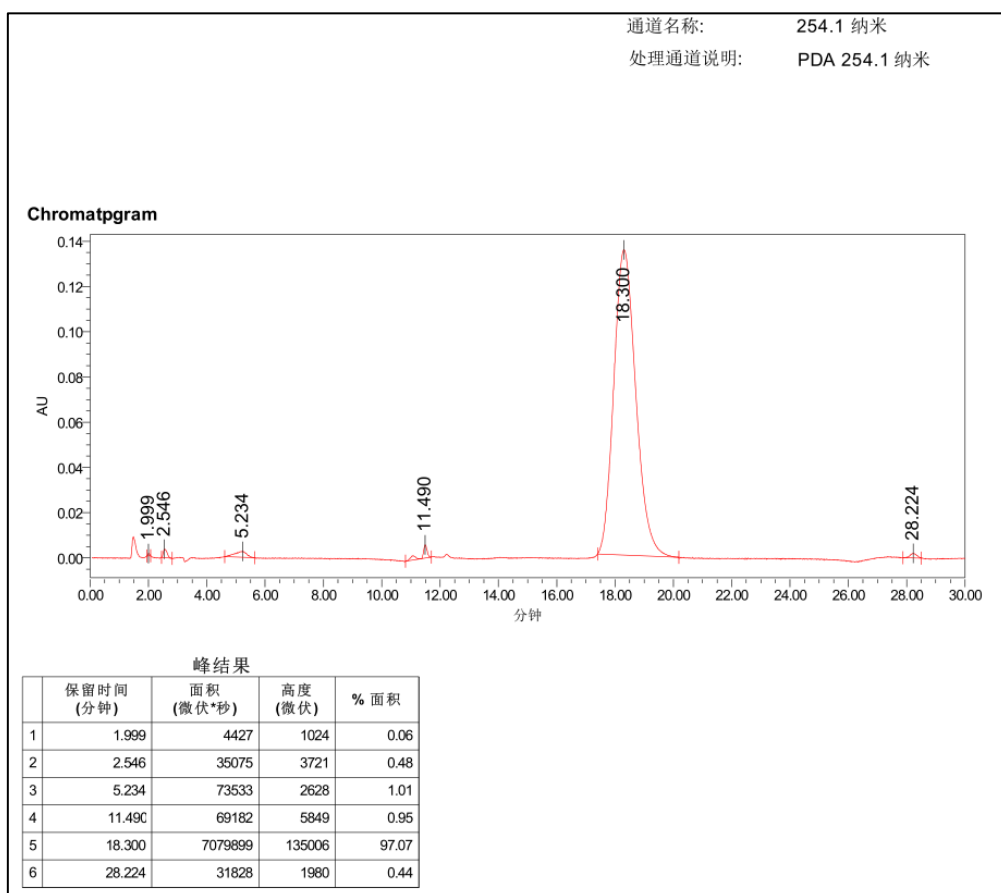

compound 5e

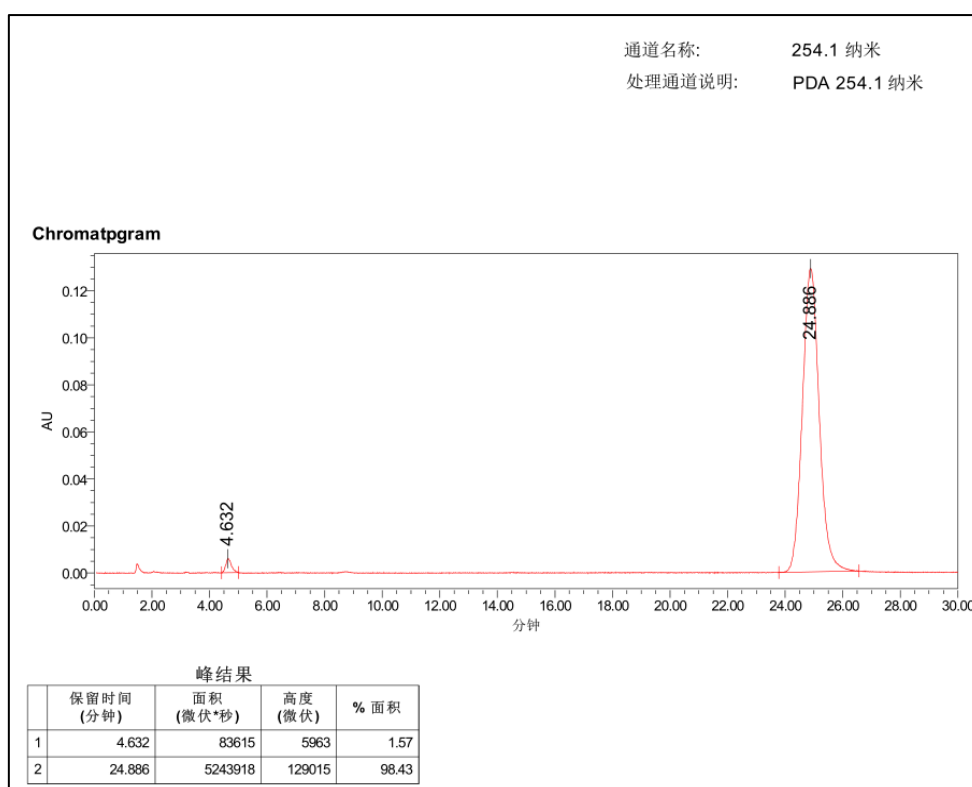

compound 5k

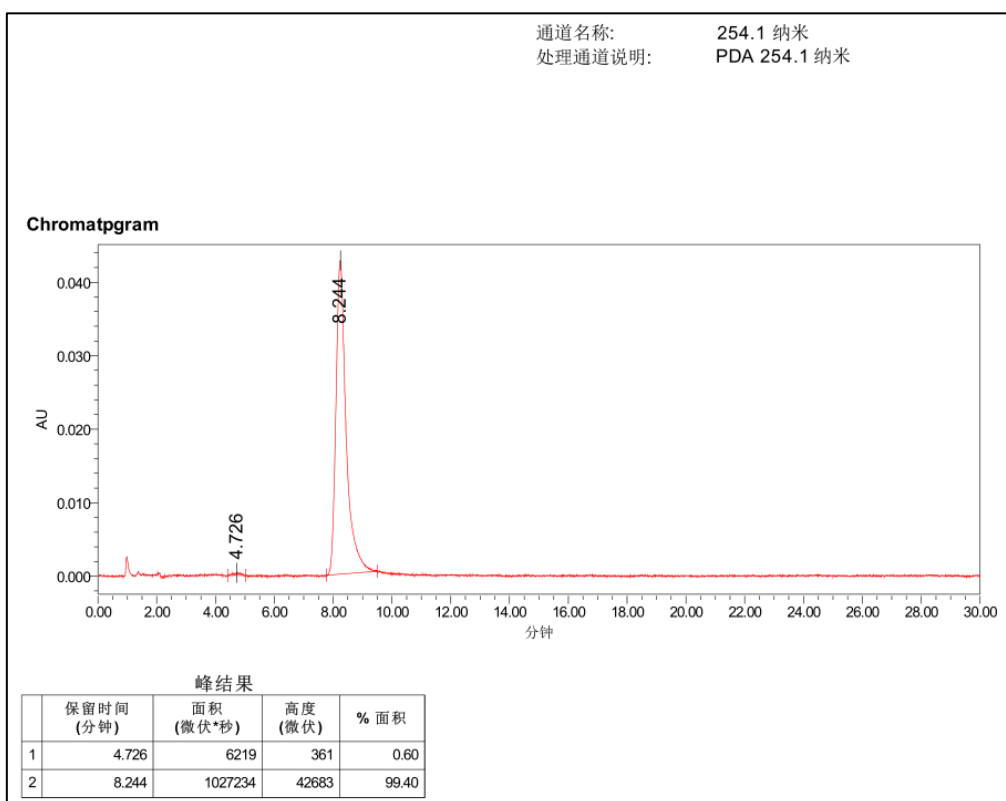

compound 5i

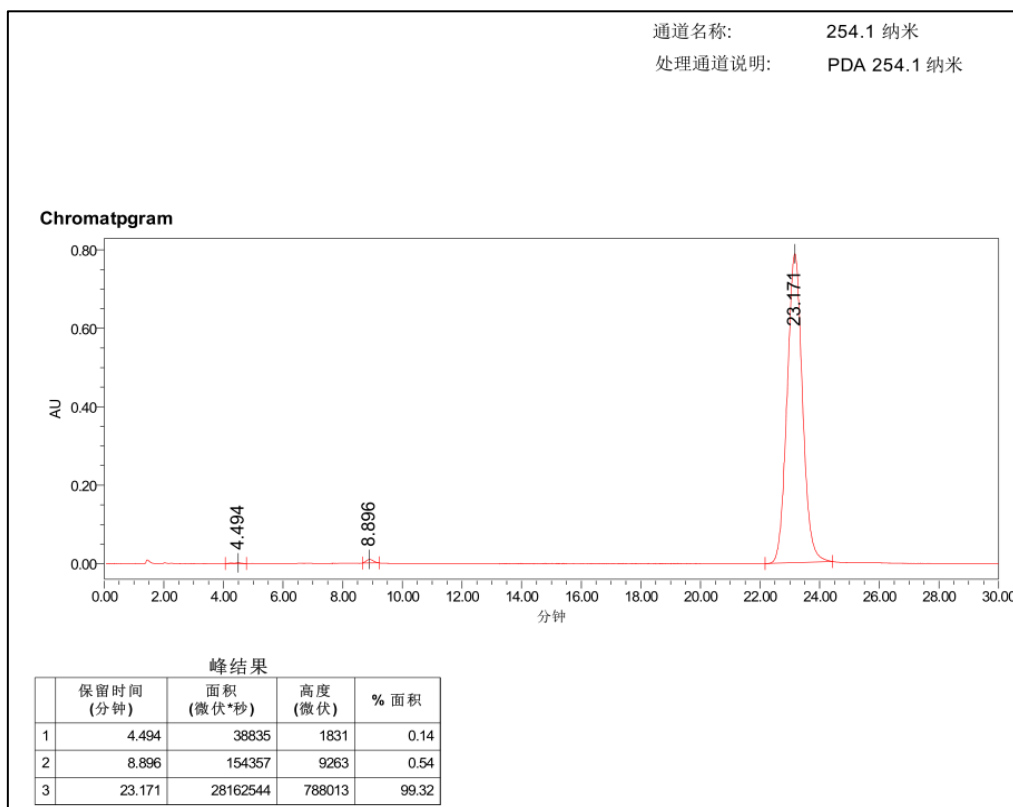

compound **5g**

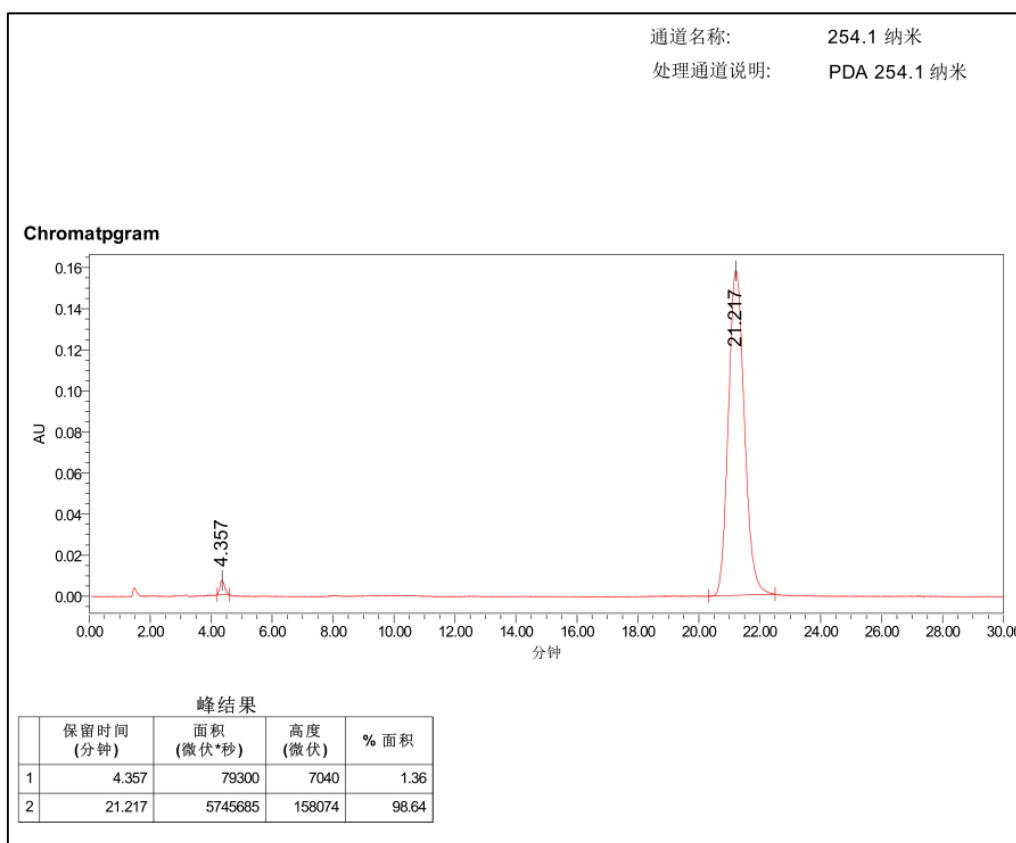

compound **11b**

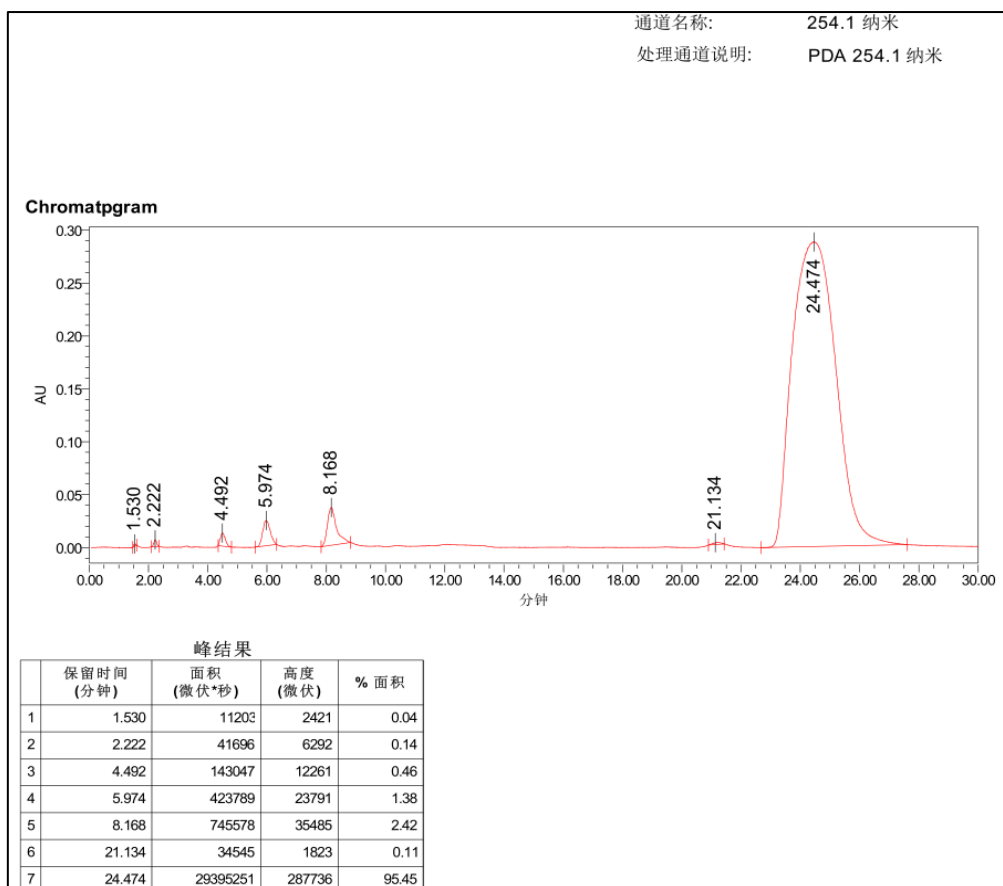

compound 11d

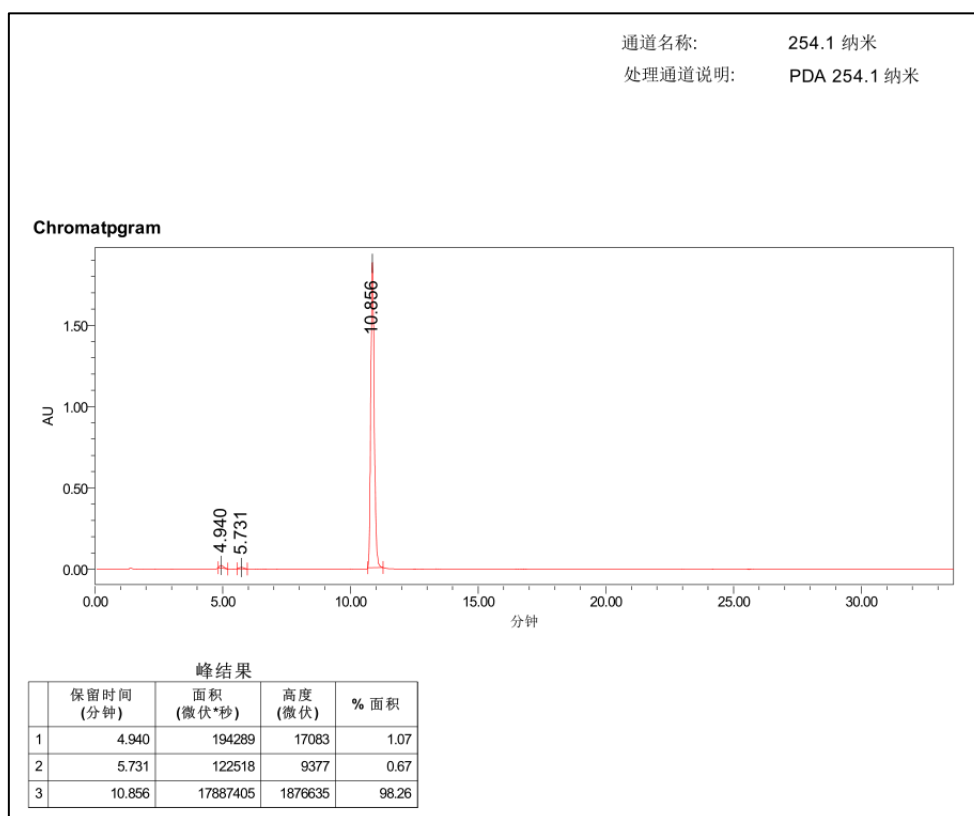

compound 11e

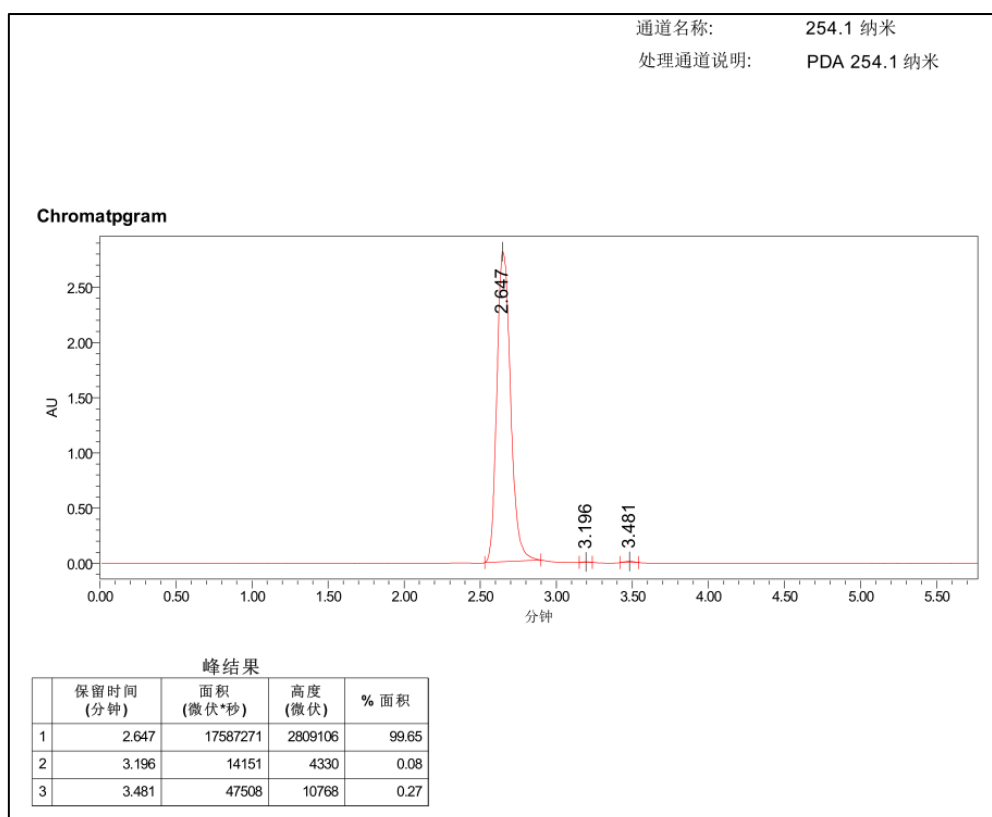

compound 15a

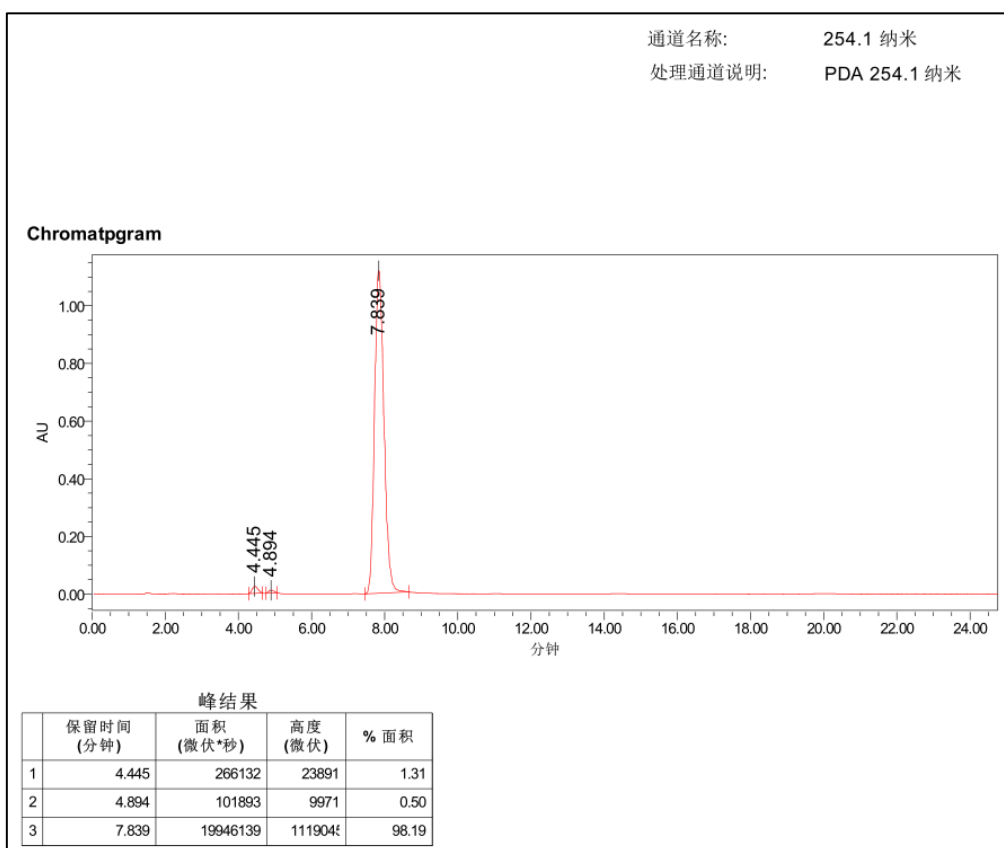

compound 15b

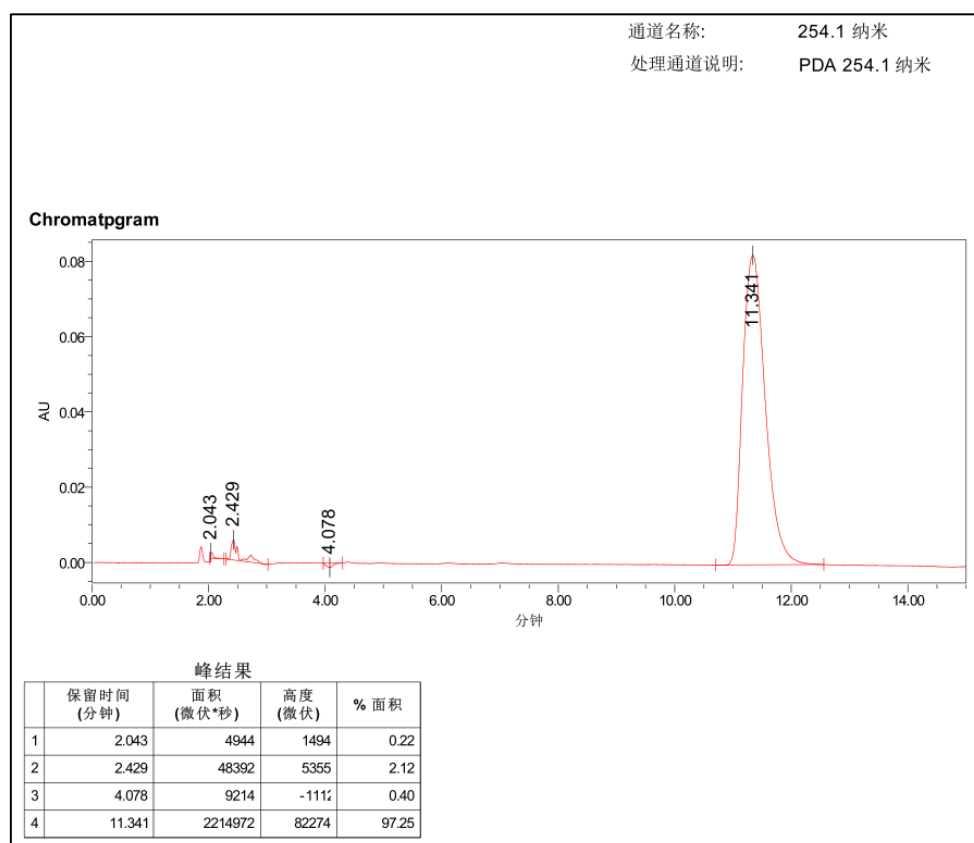

compound 19a

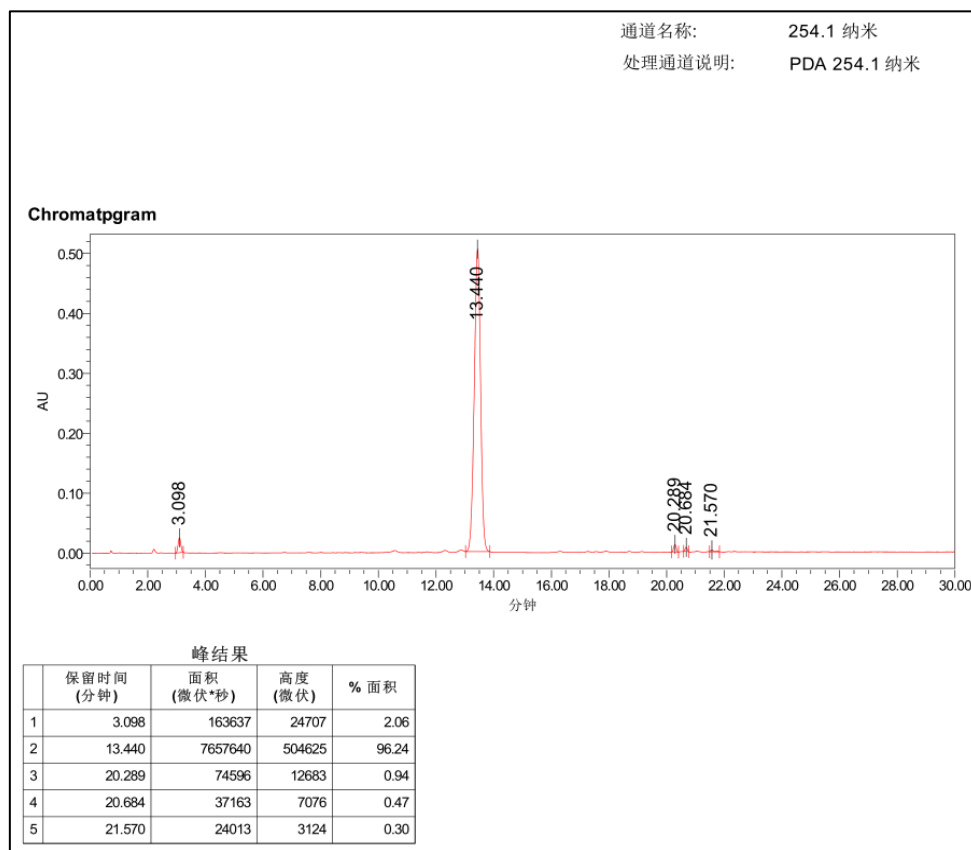

compound 19d

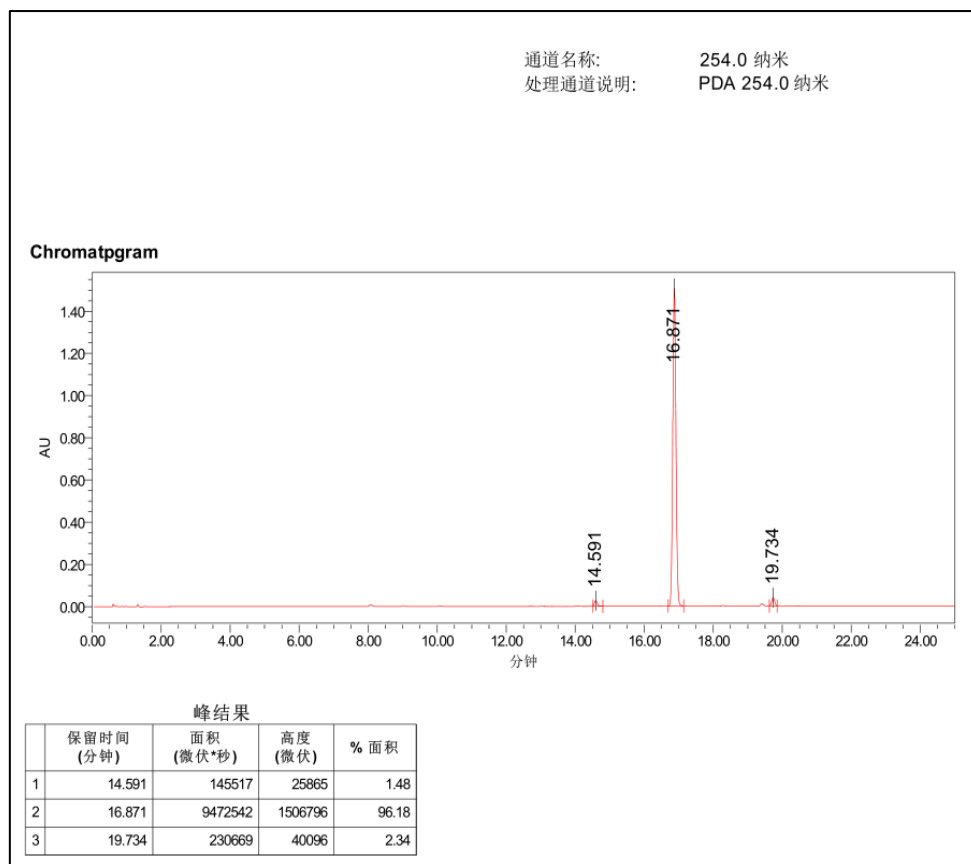

compound 19f

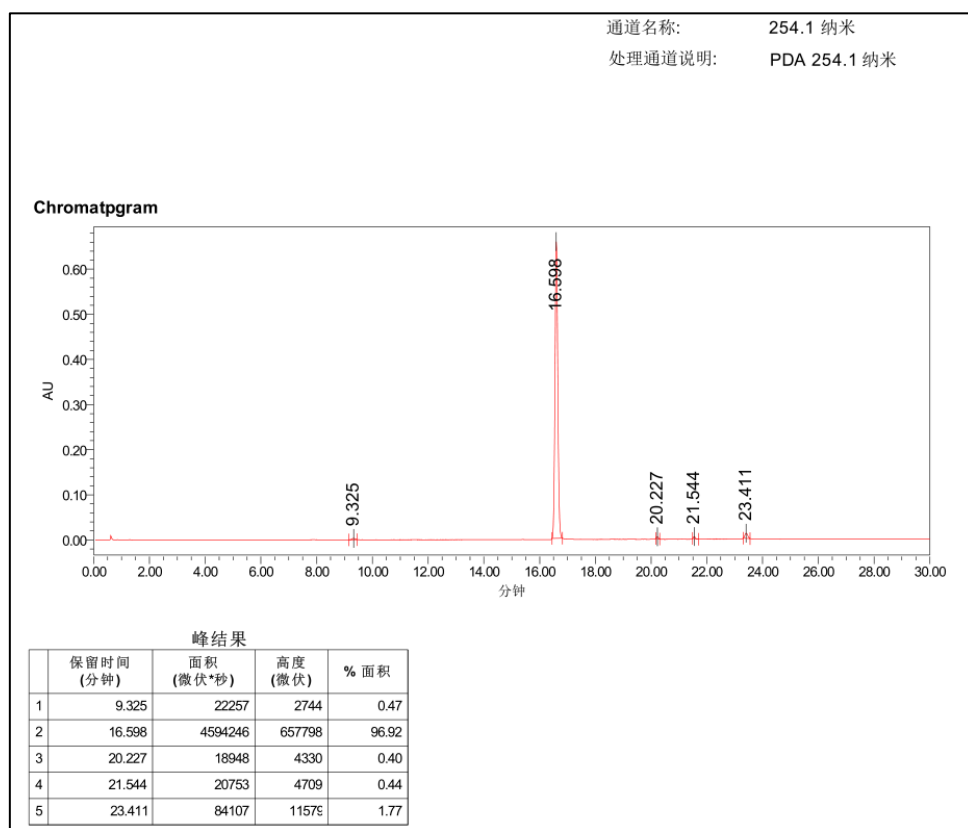

compound 19i

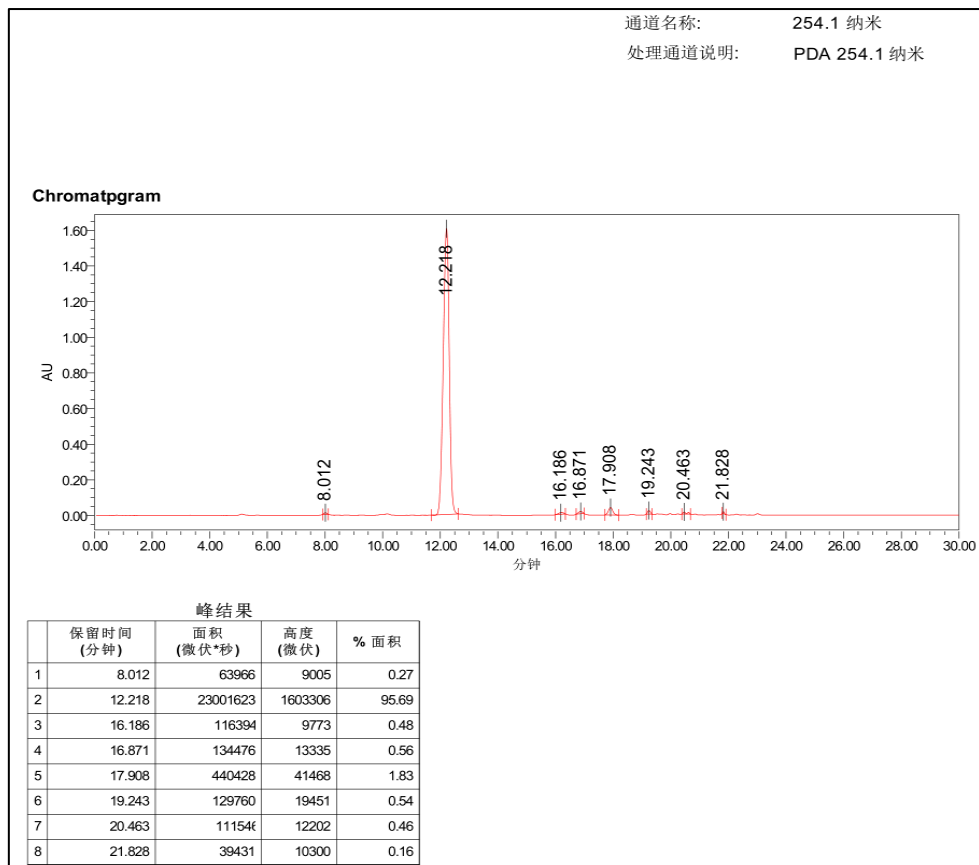



compound 19g

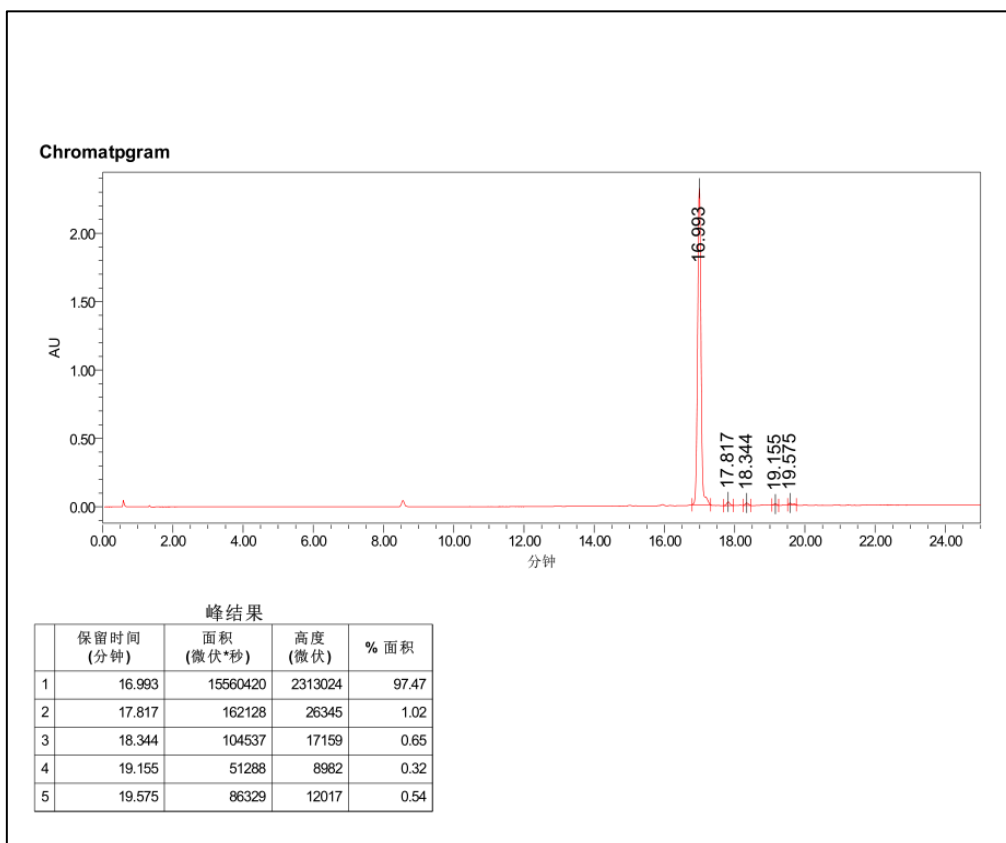

compound 19h

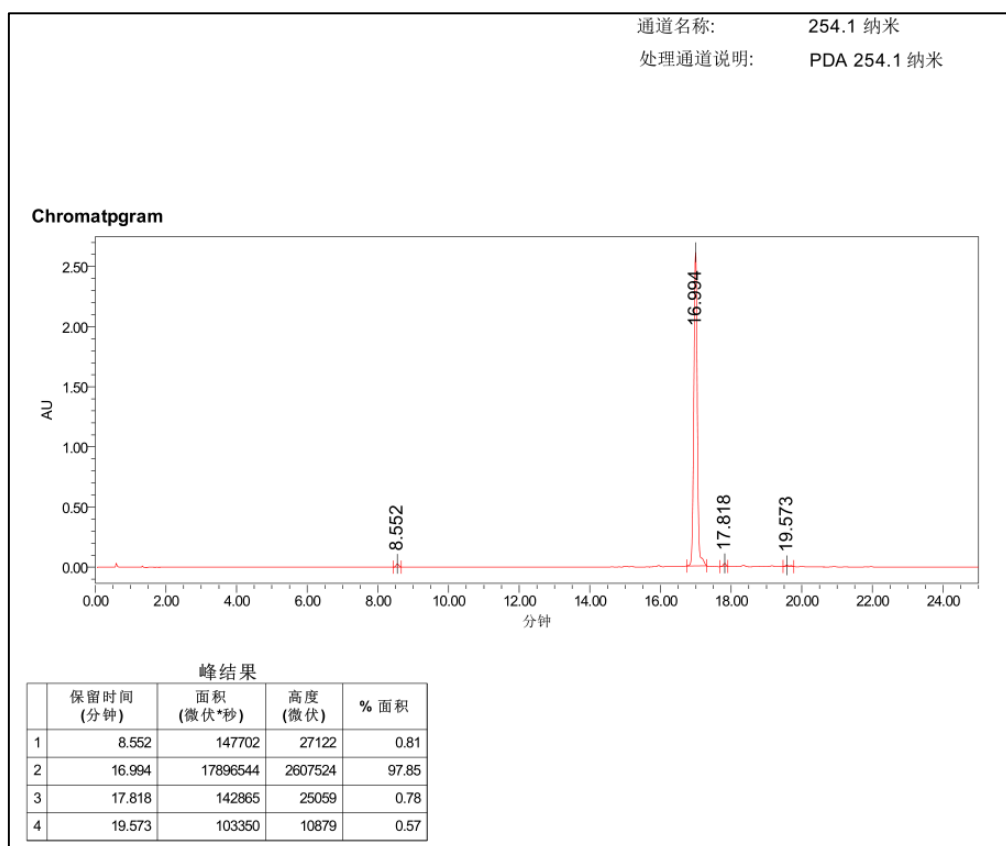

compound 19k

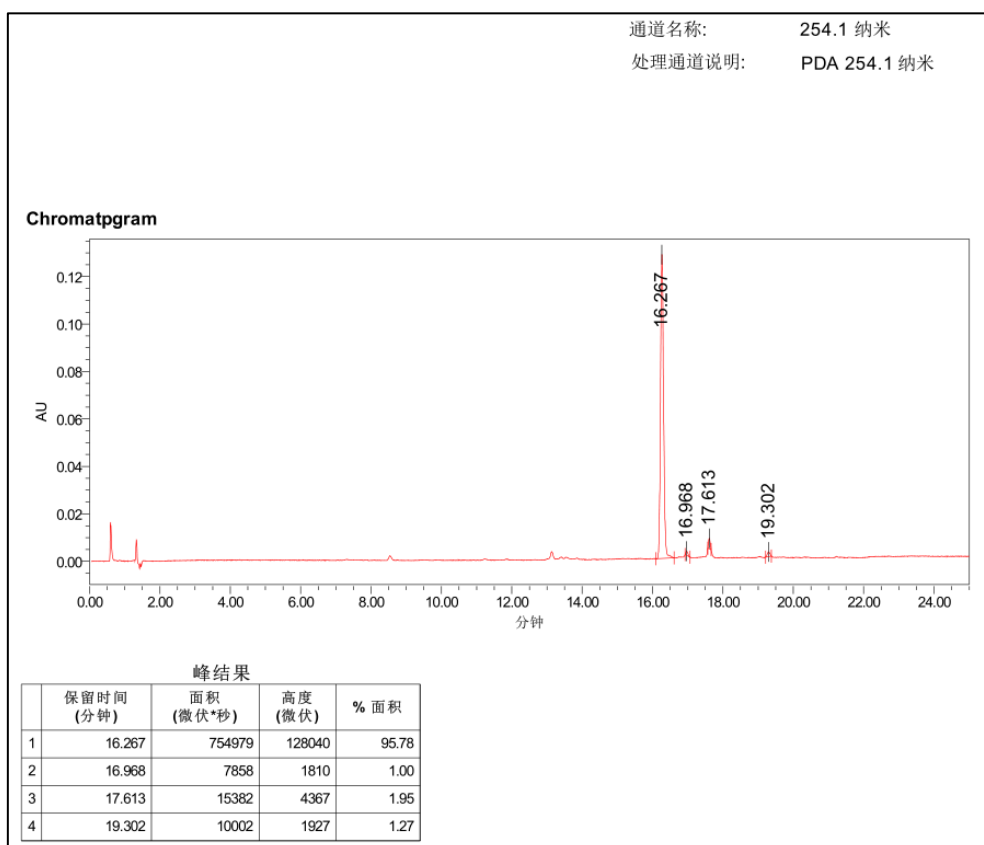

compound 19o

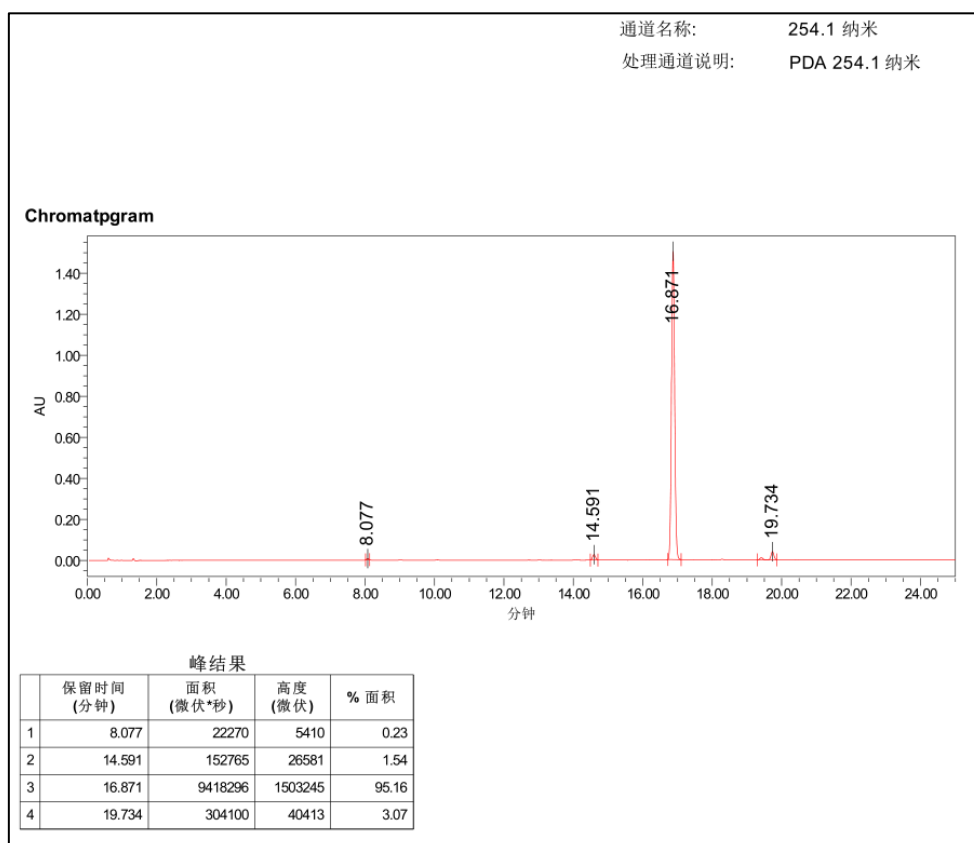

compound 19q

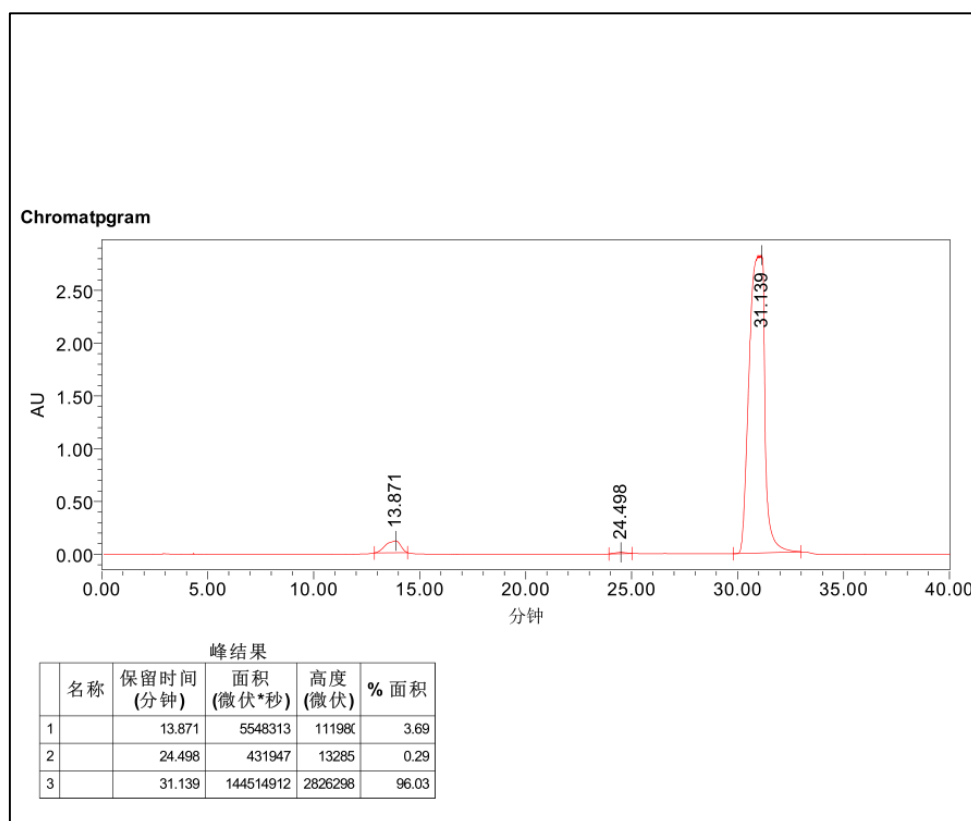

compound 19t

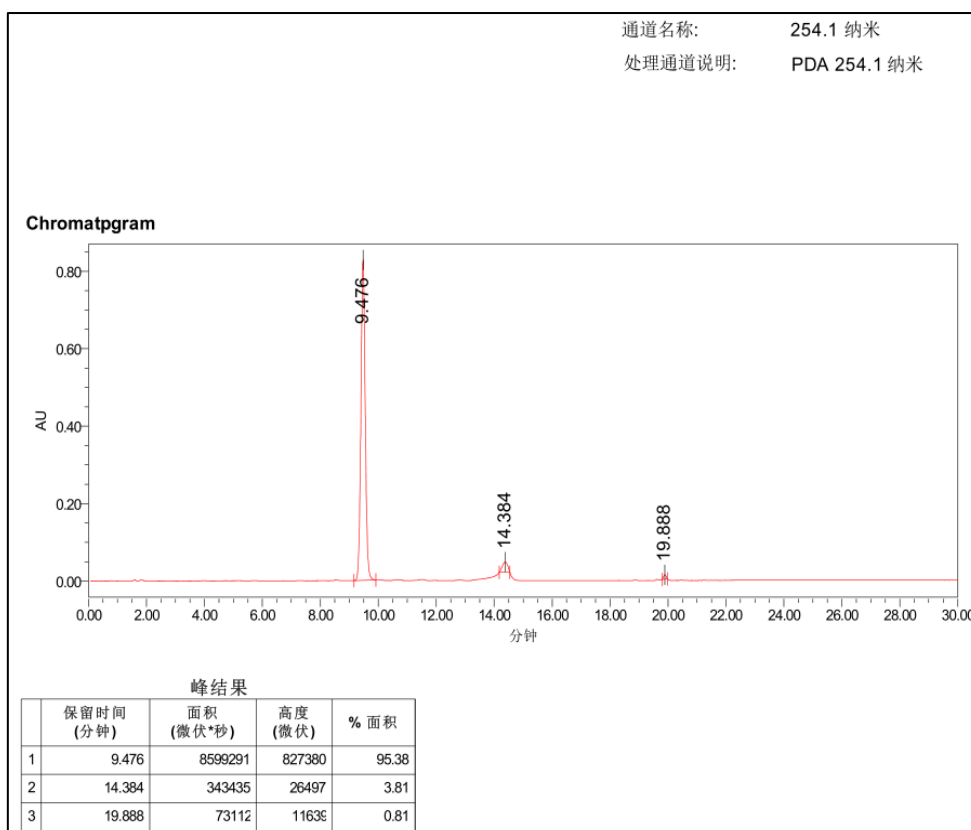

compound 19s

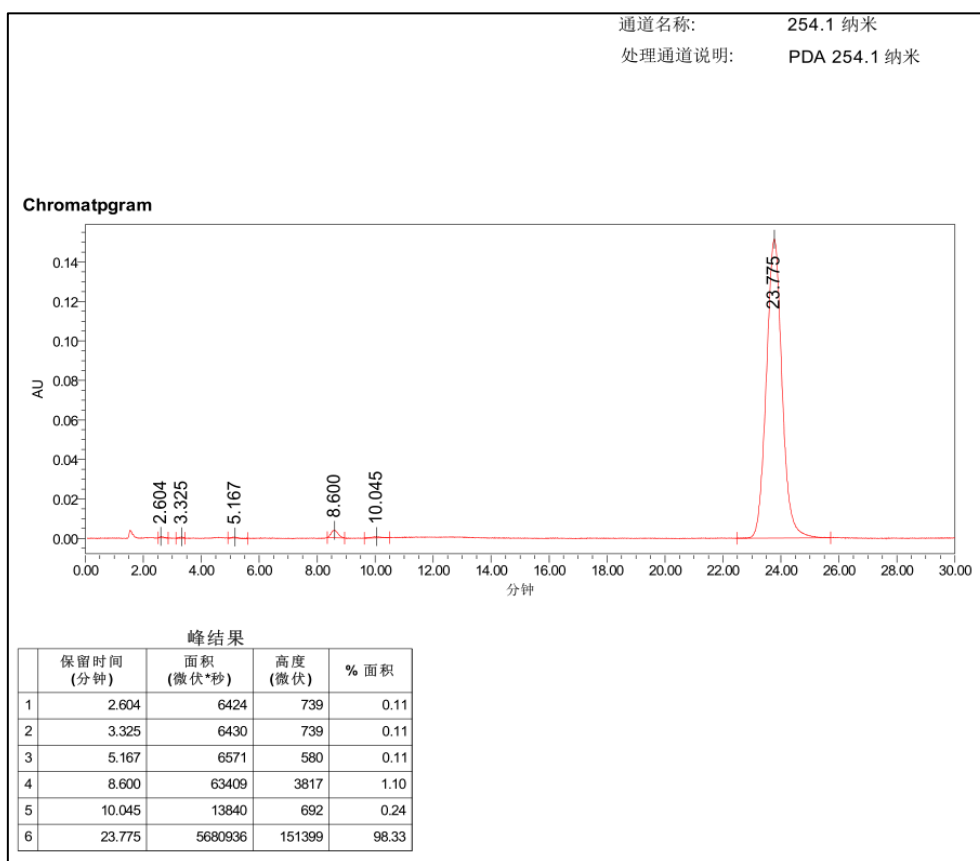

compound 19u

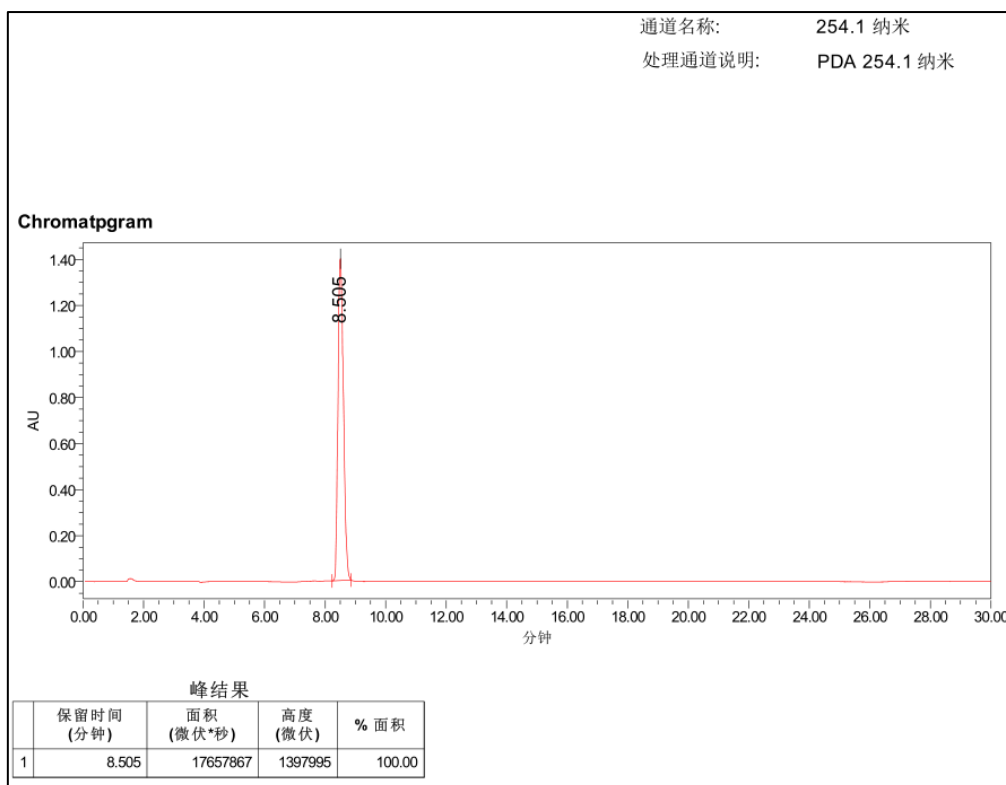

## 4. HRMS spectra

### compound 5a

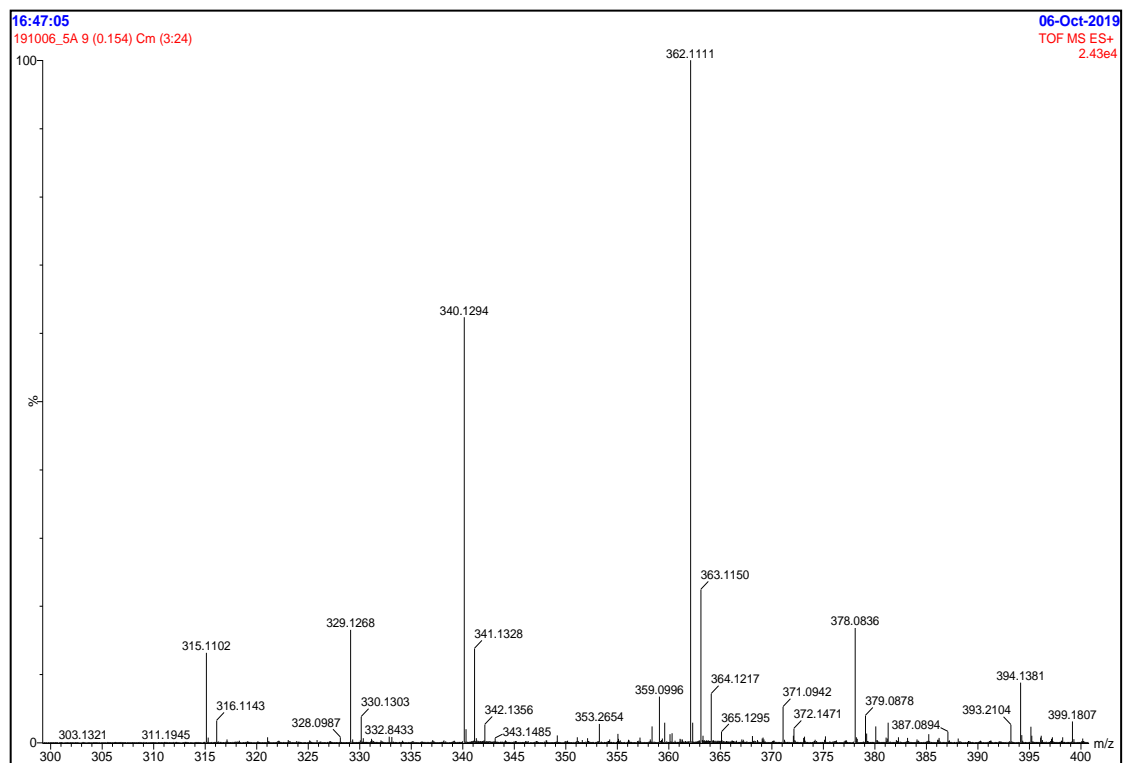

### compound 5b

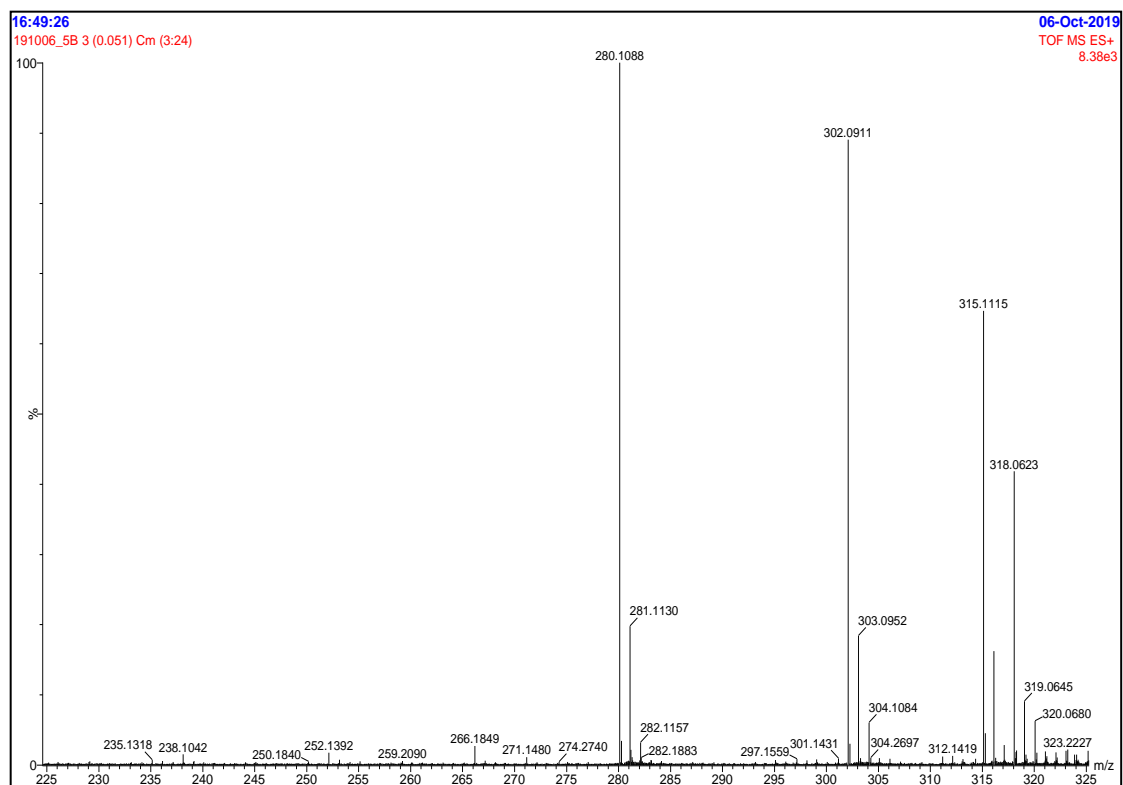

### compound 5c

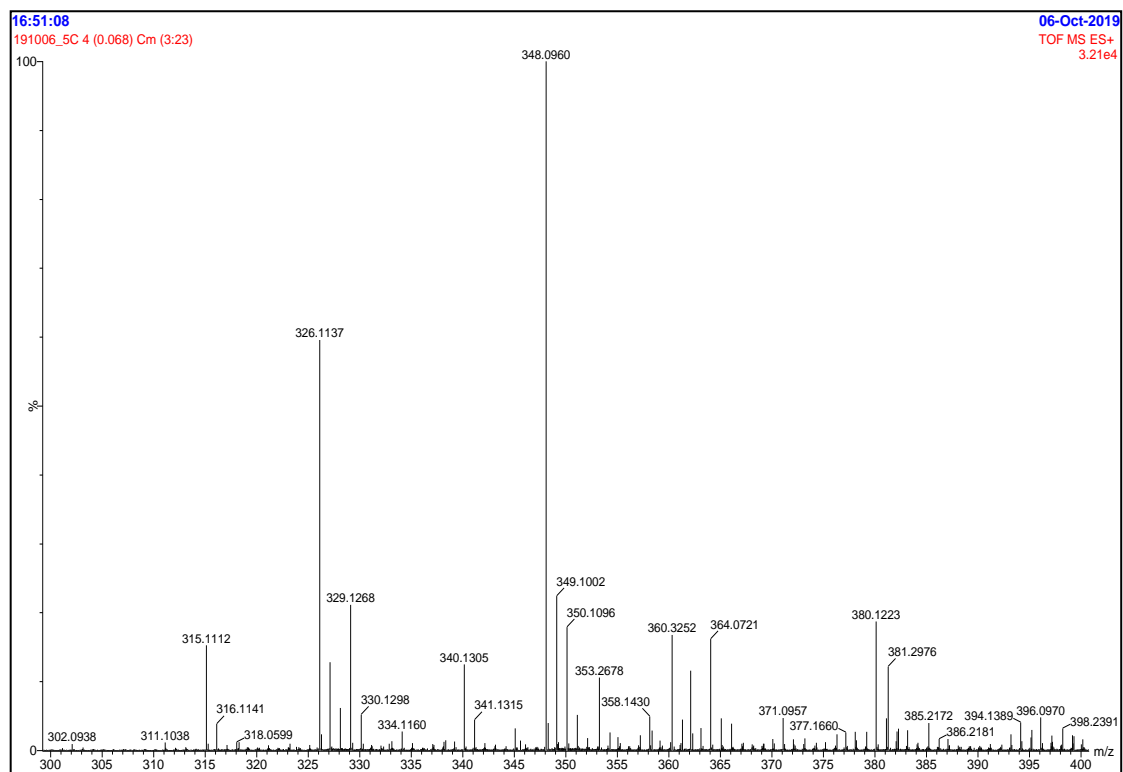

### compound 5d

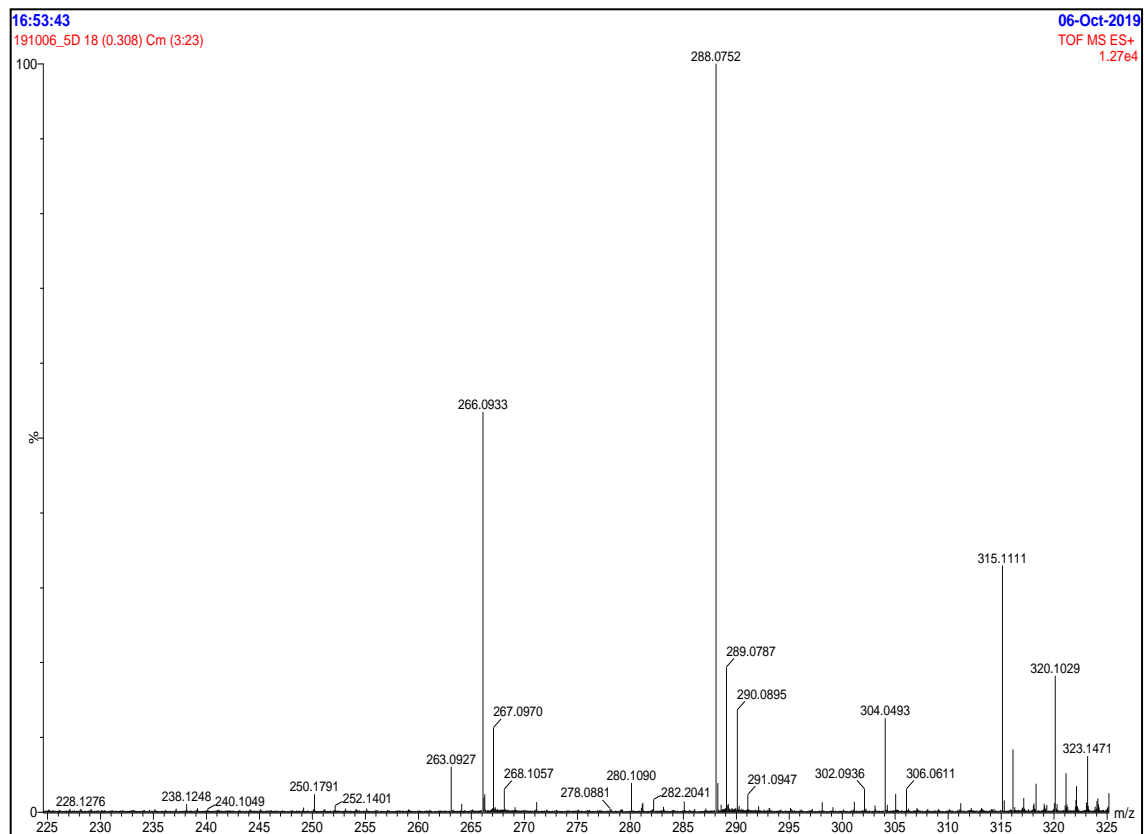

### compound 5g

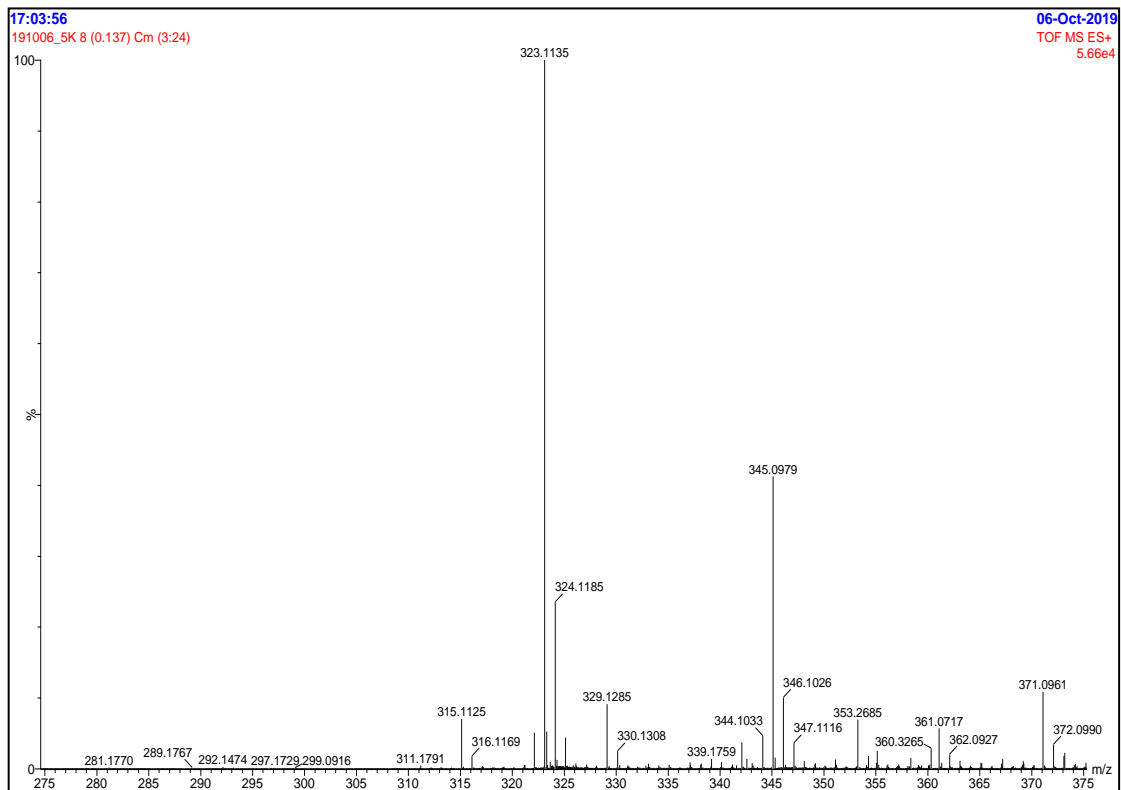

### compound 5h

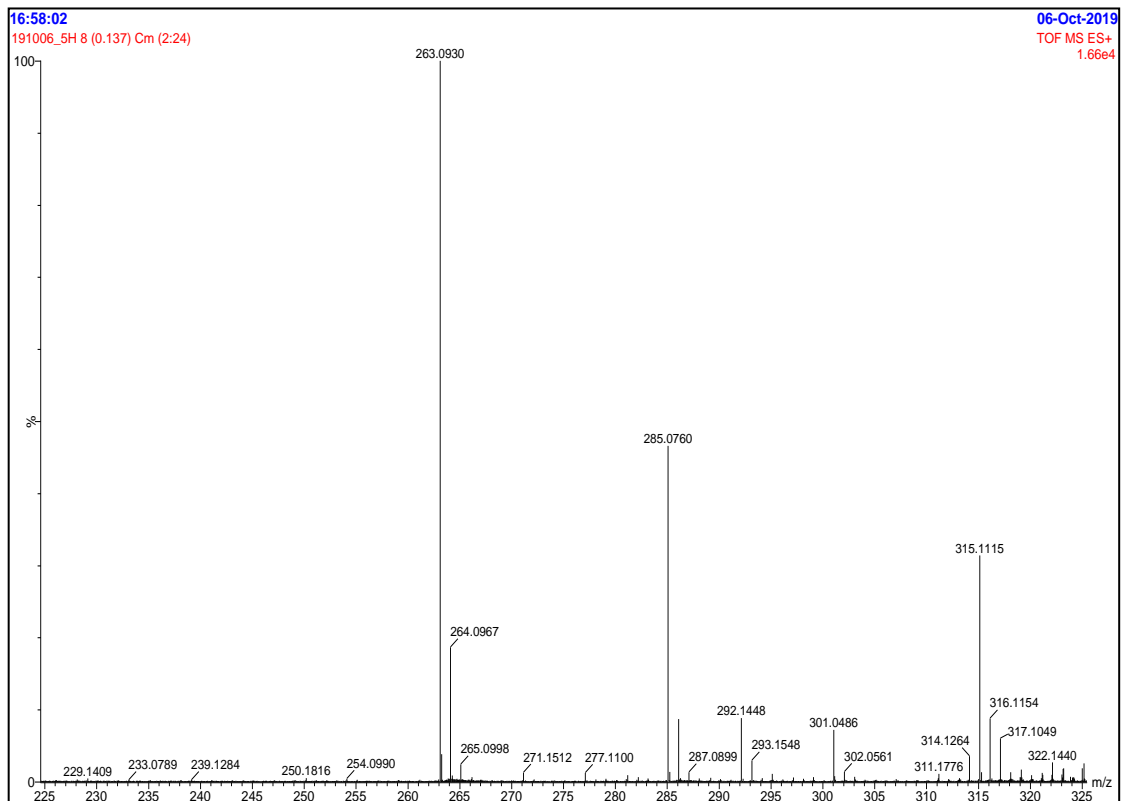

# compound 5i

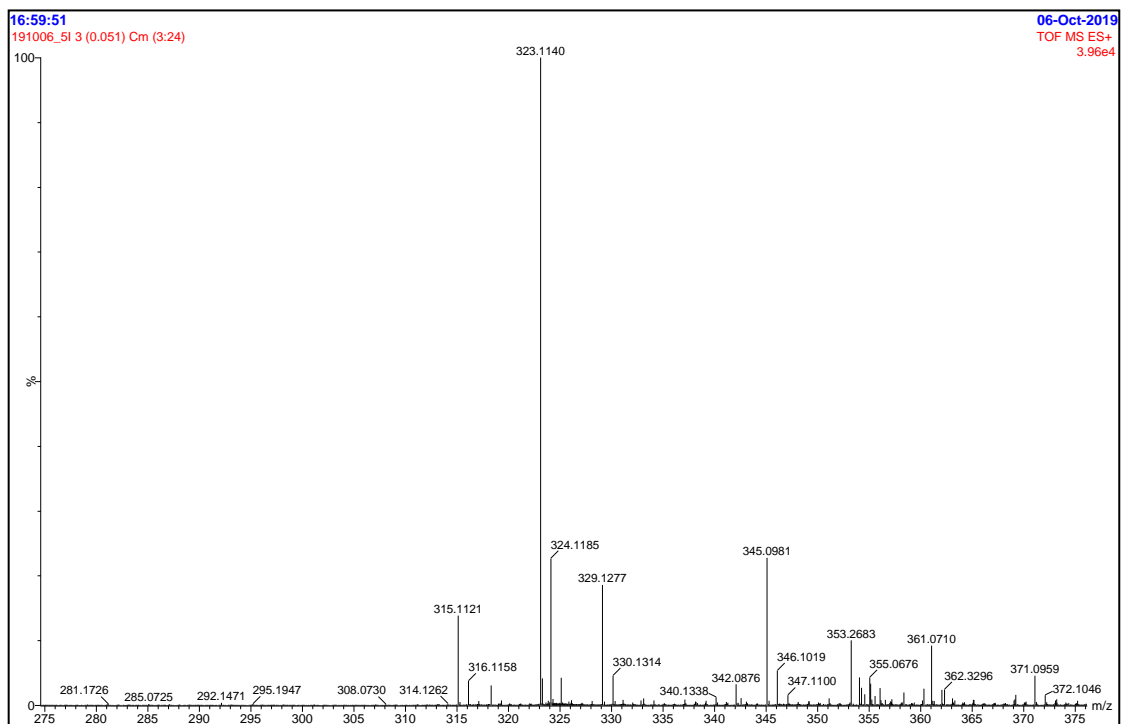

# compound 5j

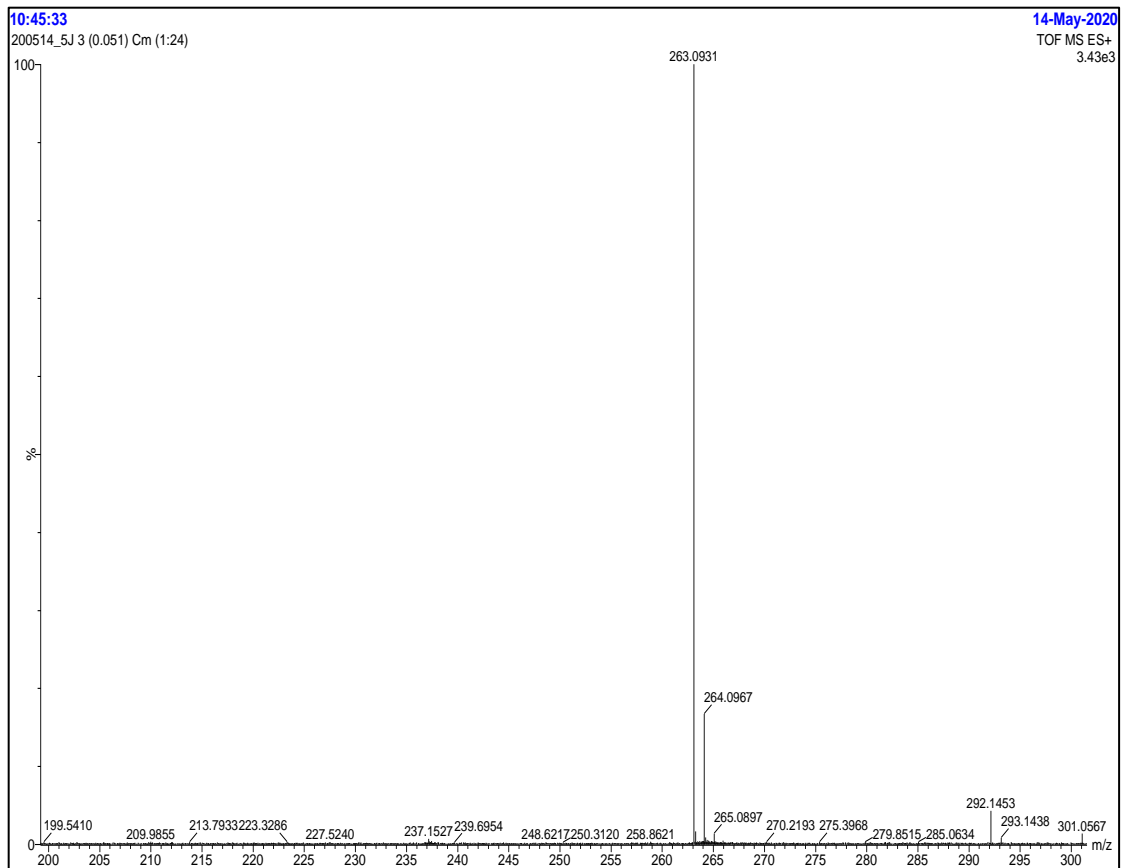



# compound 5k

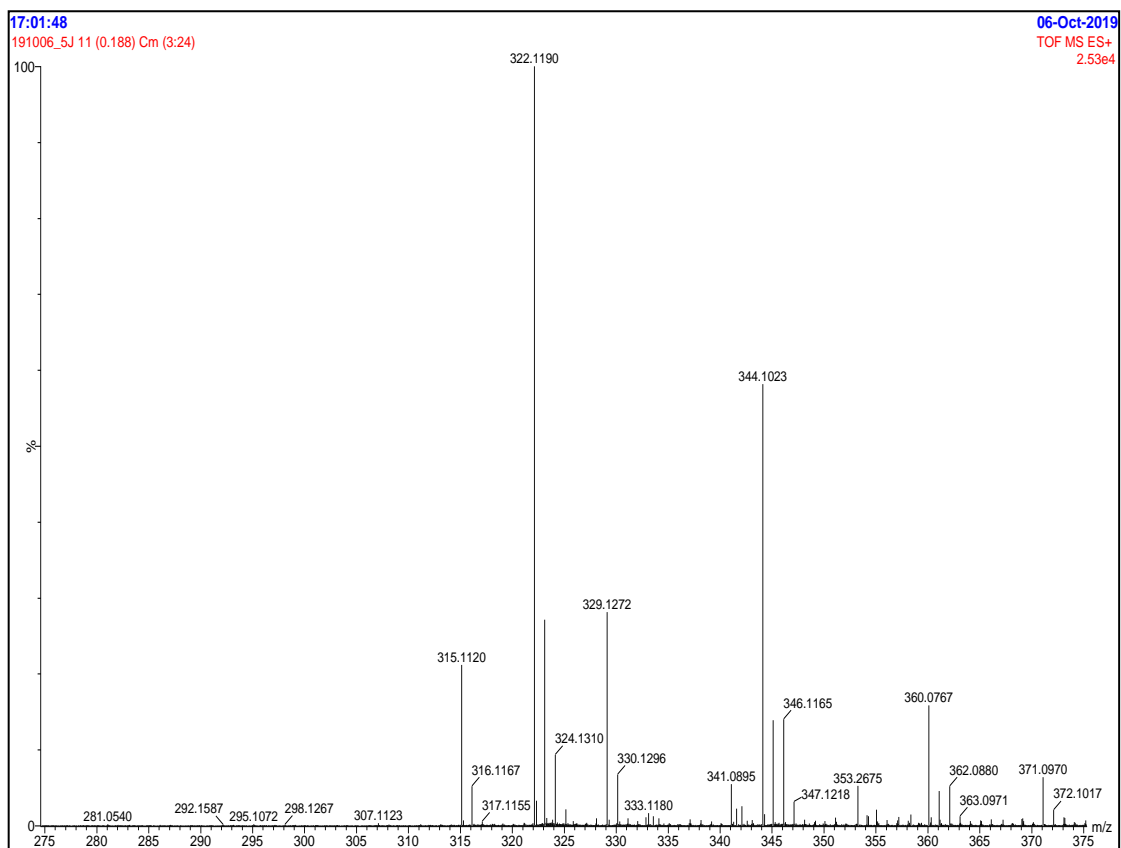

# compound 11a

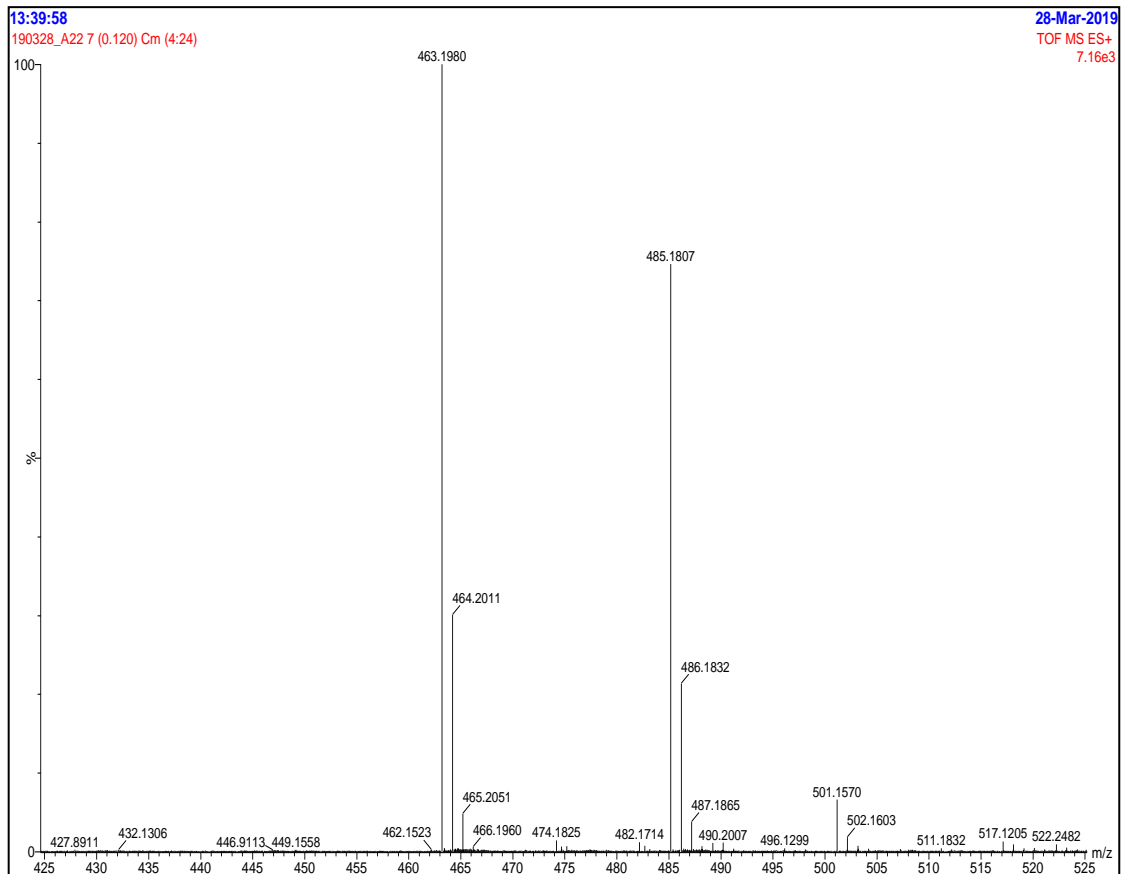

# compound 11b

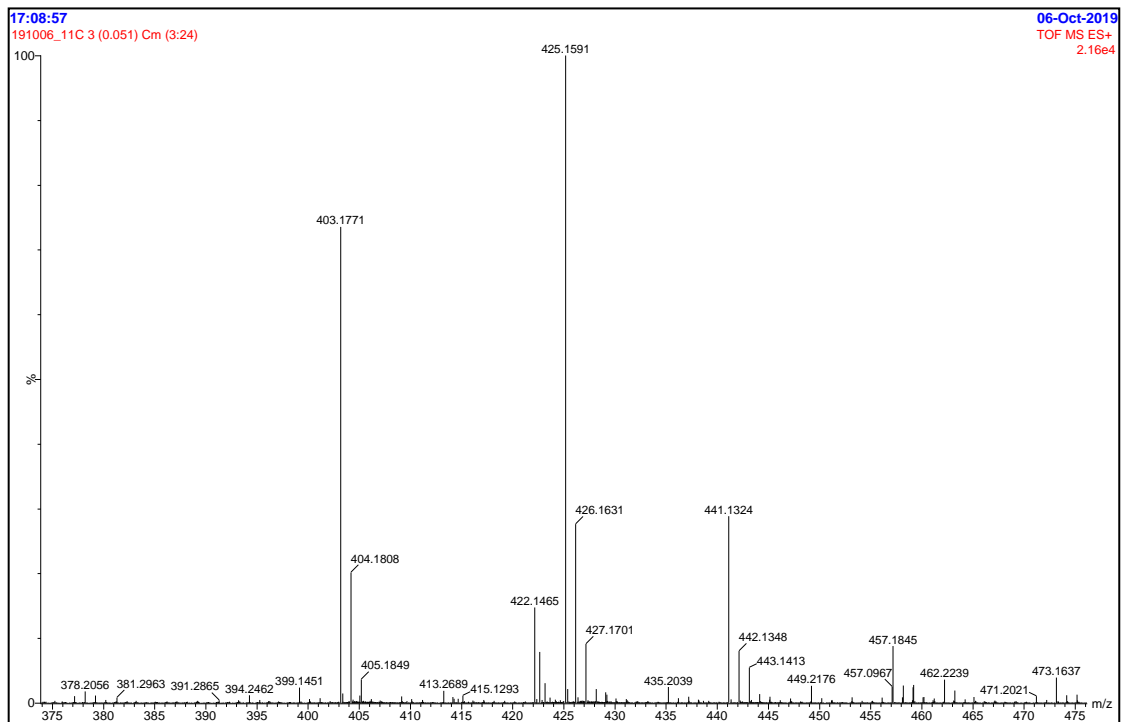

# compound 11c

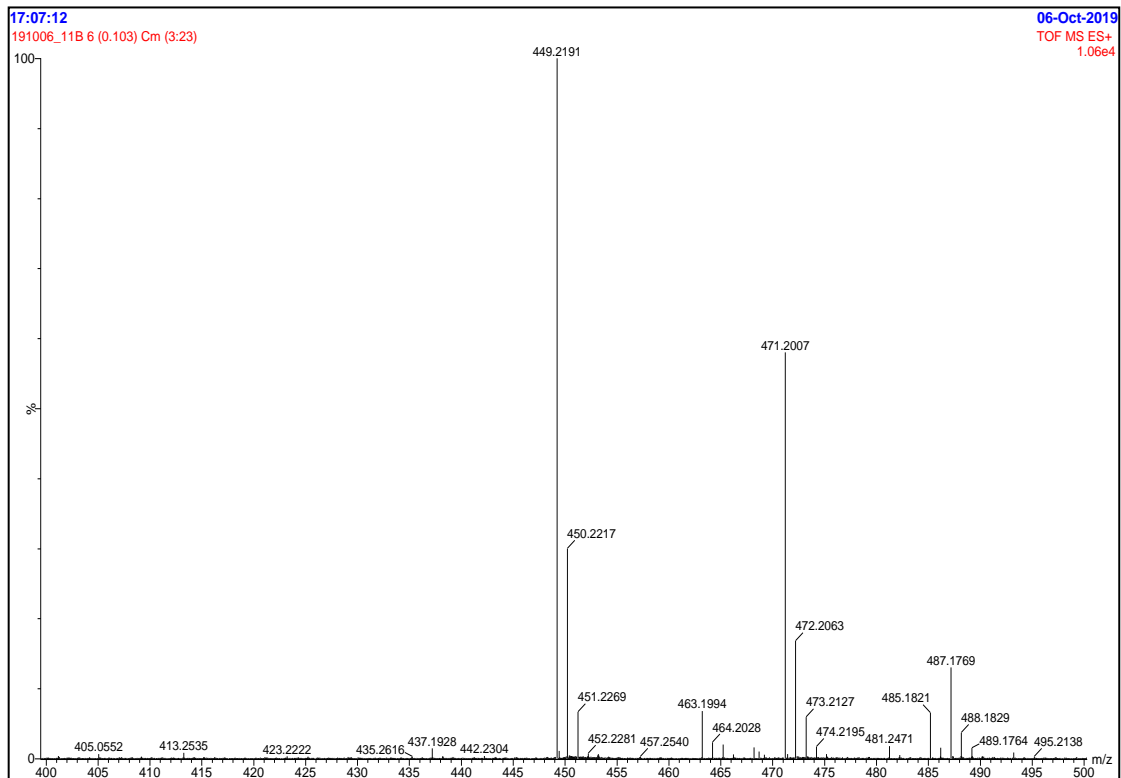

# compound 11e

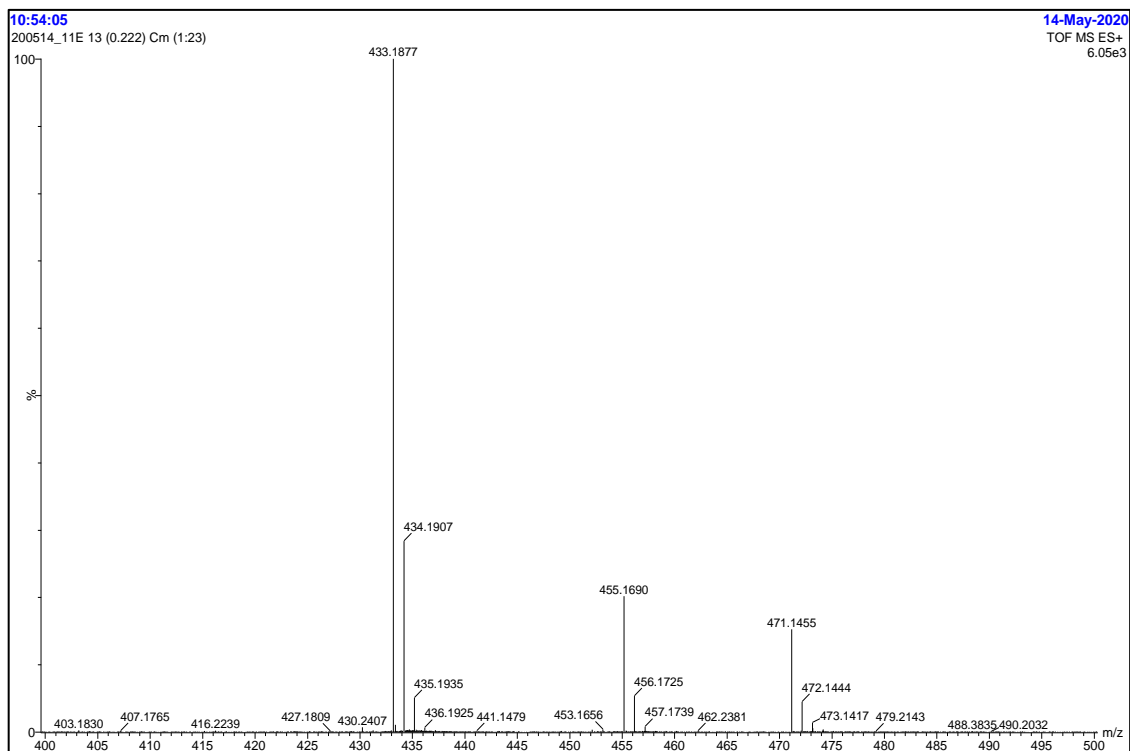

# compound 15a

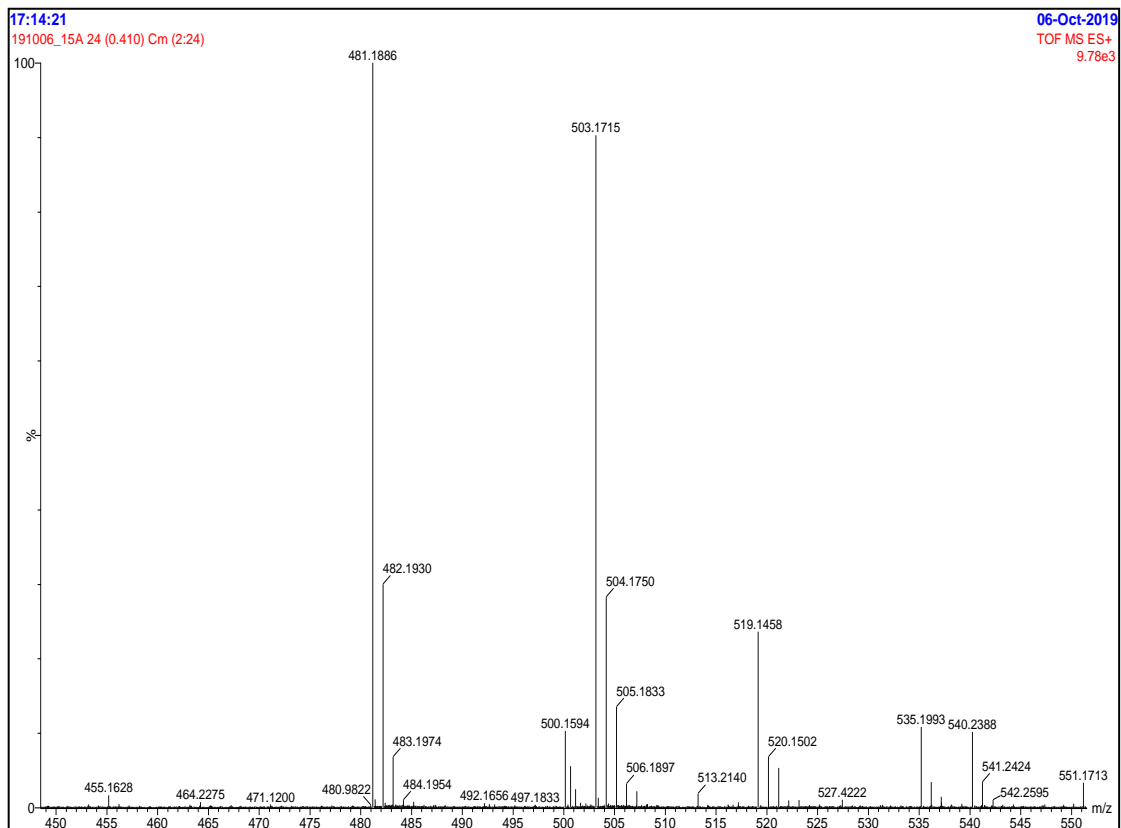

## compound 15b

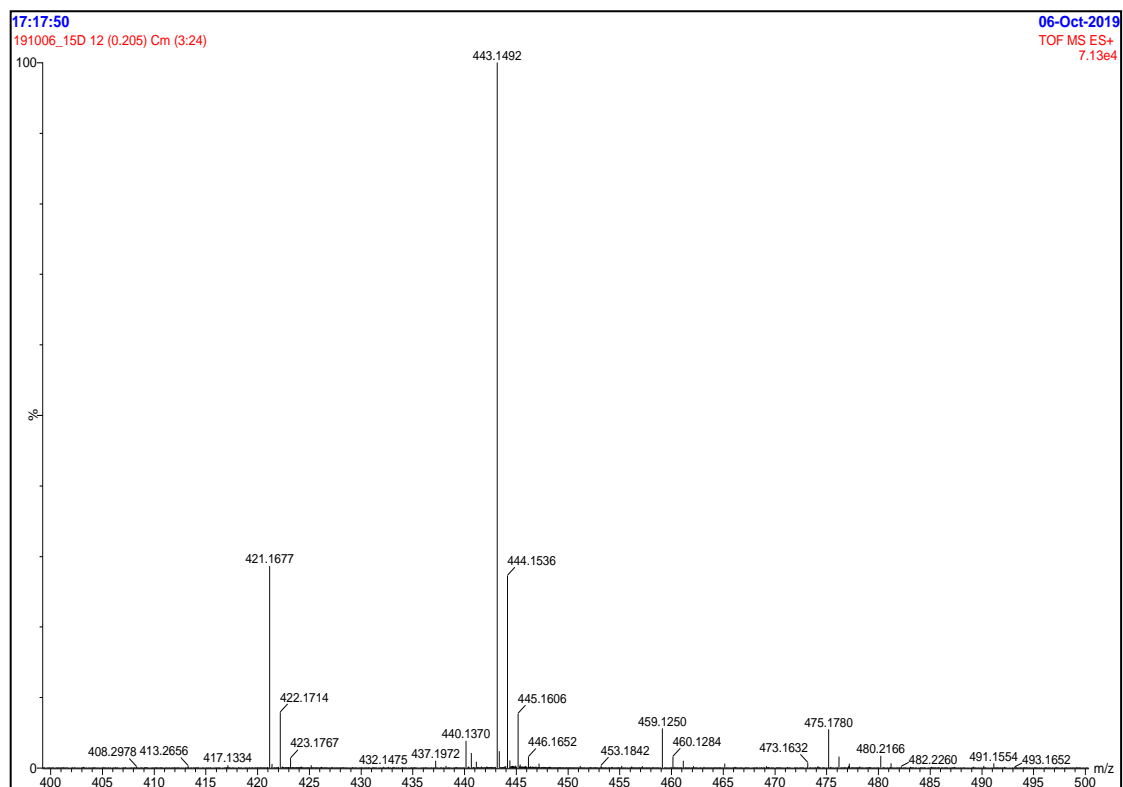

## compound 15c

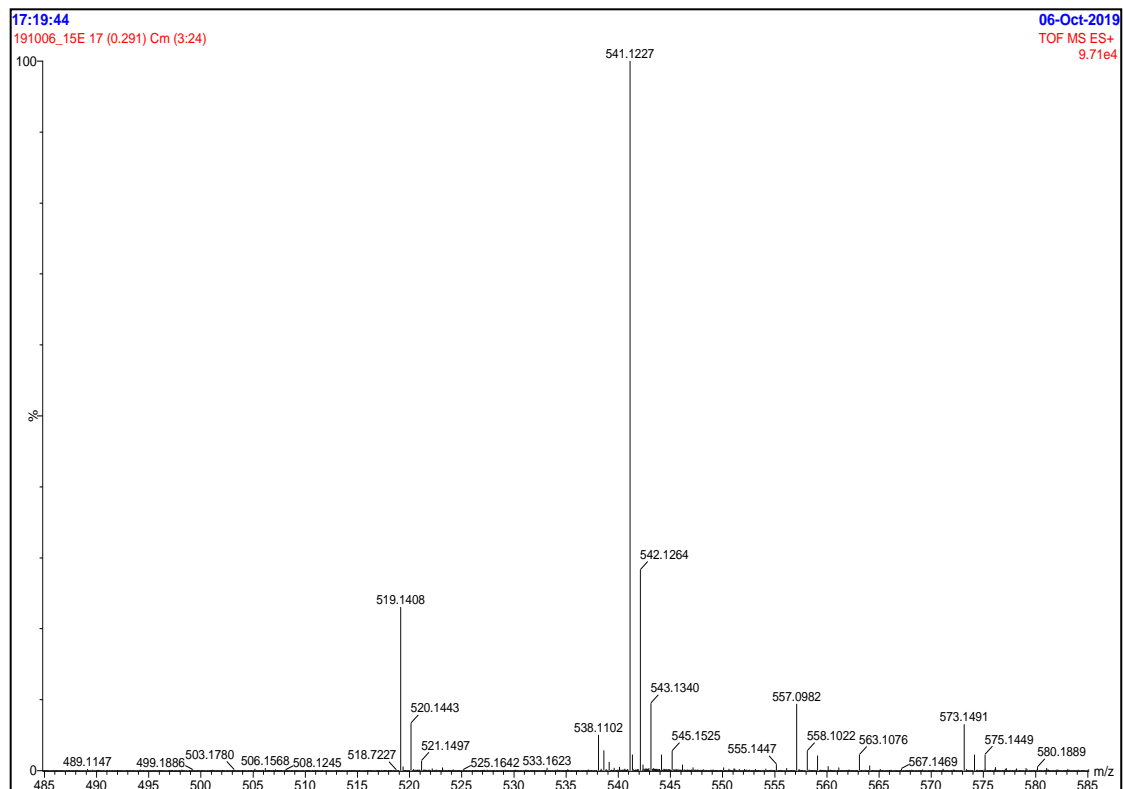

# compound 15d

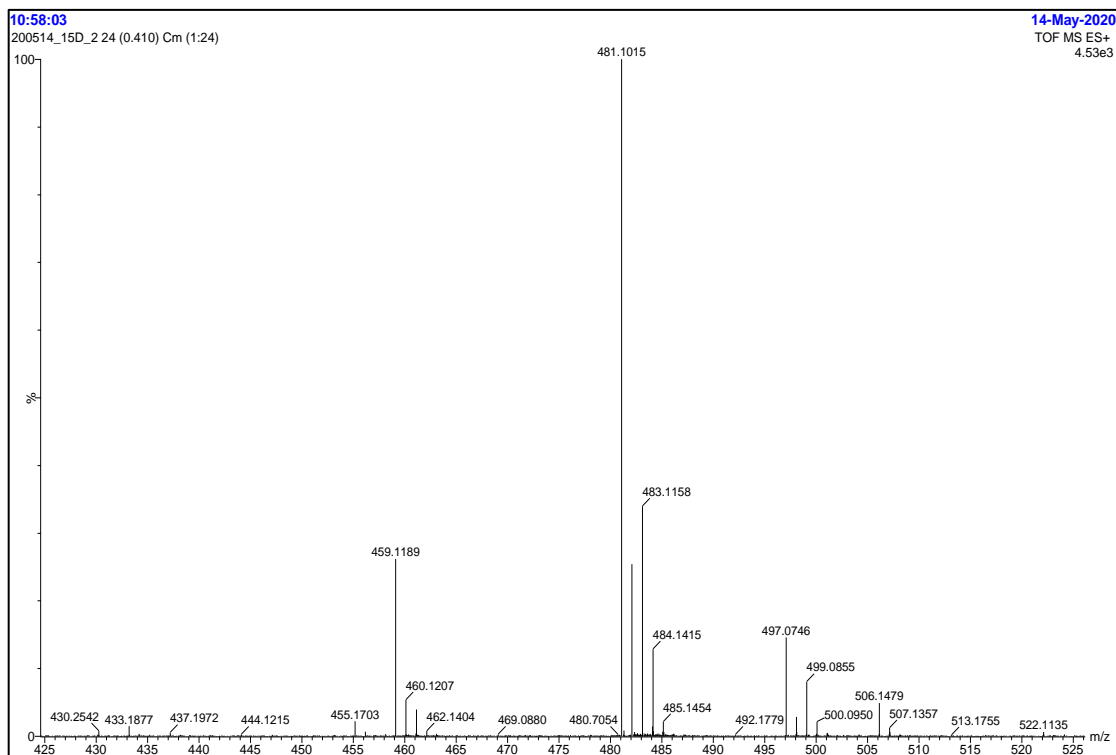

# compound 15e

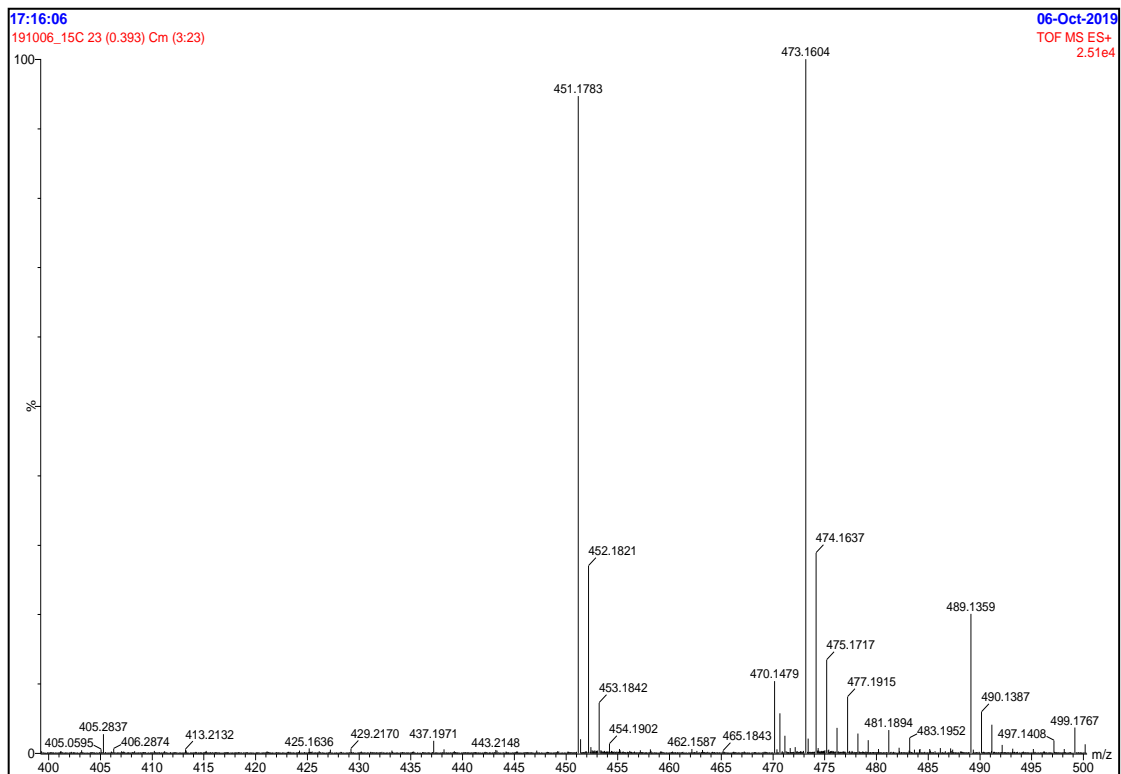

### compound 19a

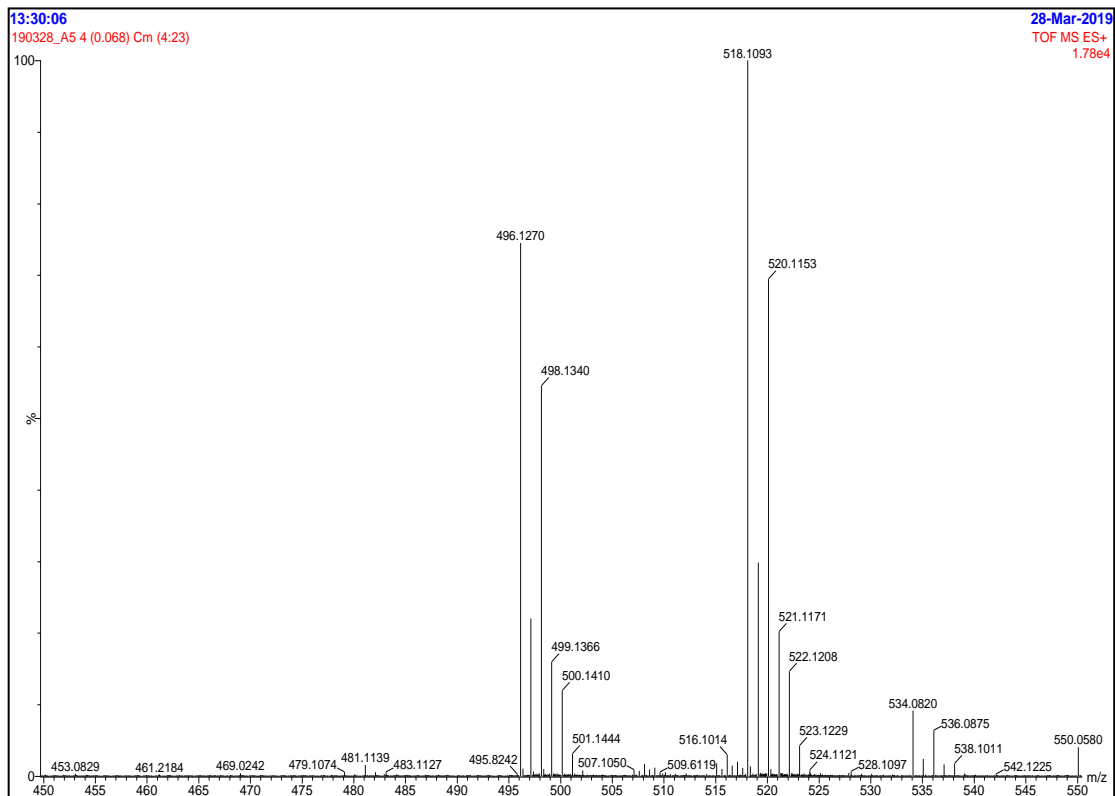

### compound 19b

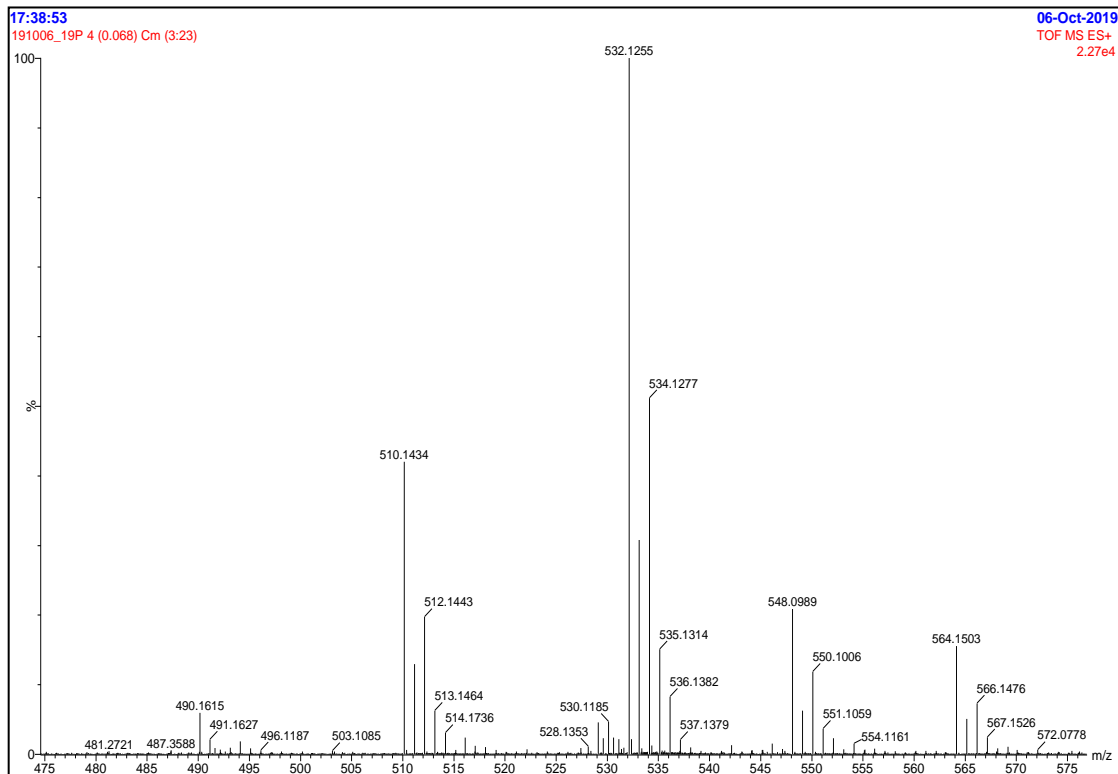

### compound 19c

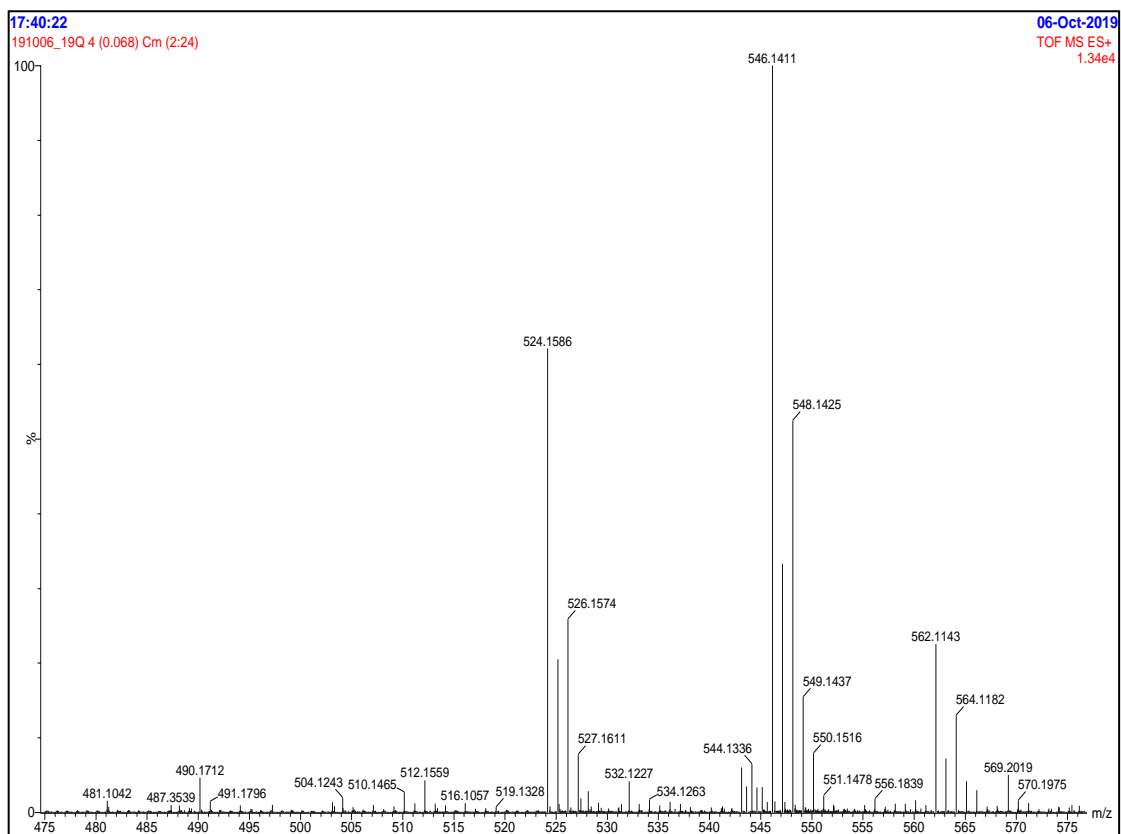

### compound 19d

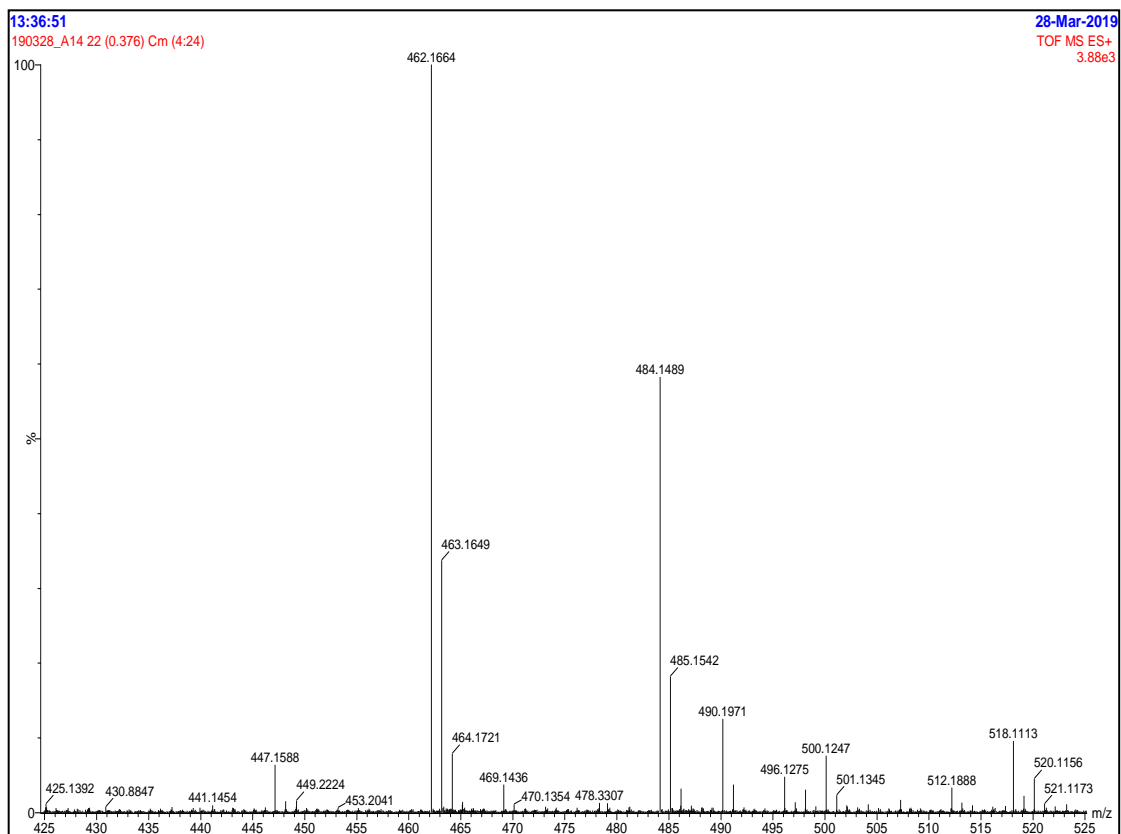

### compound 19e

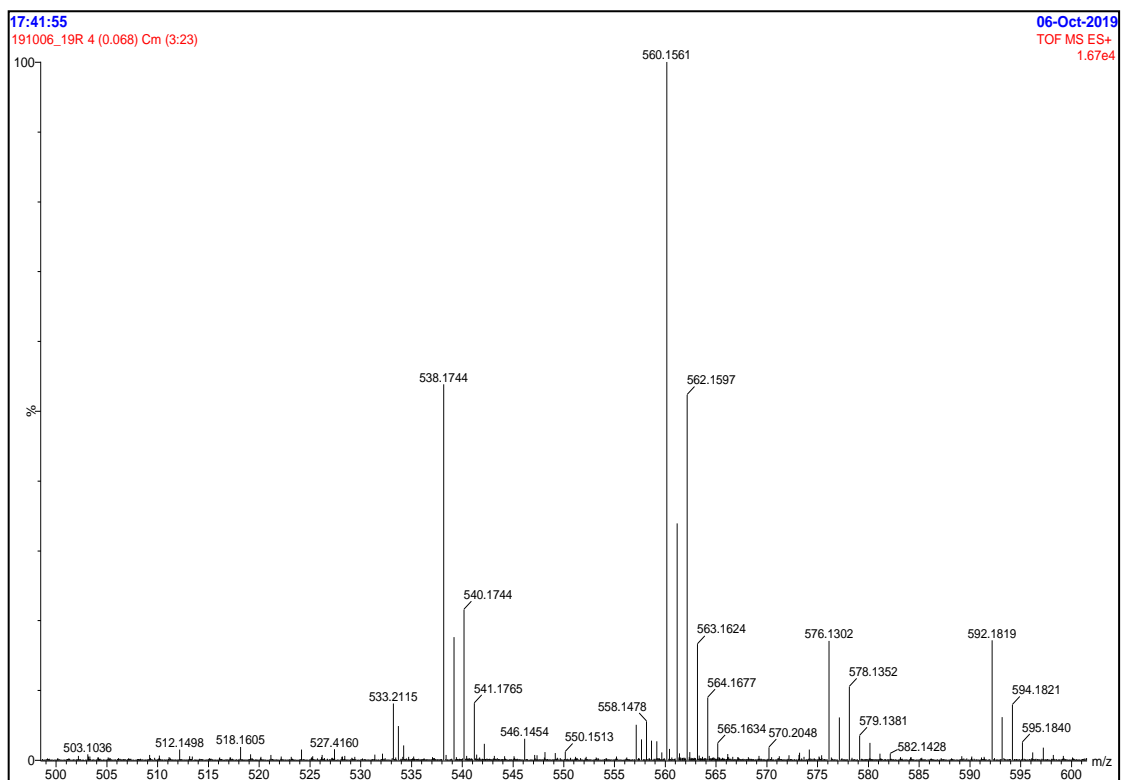

### compound 19f

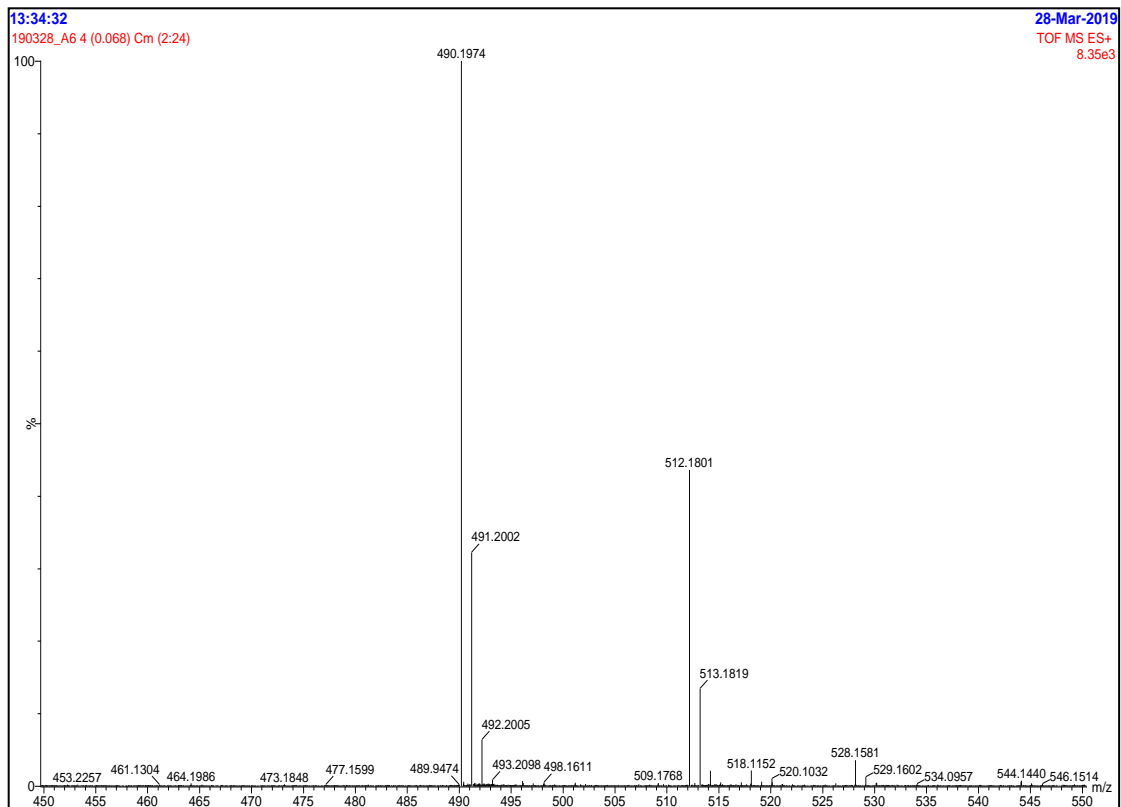



# compound 19g

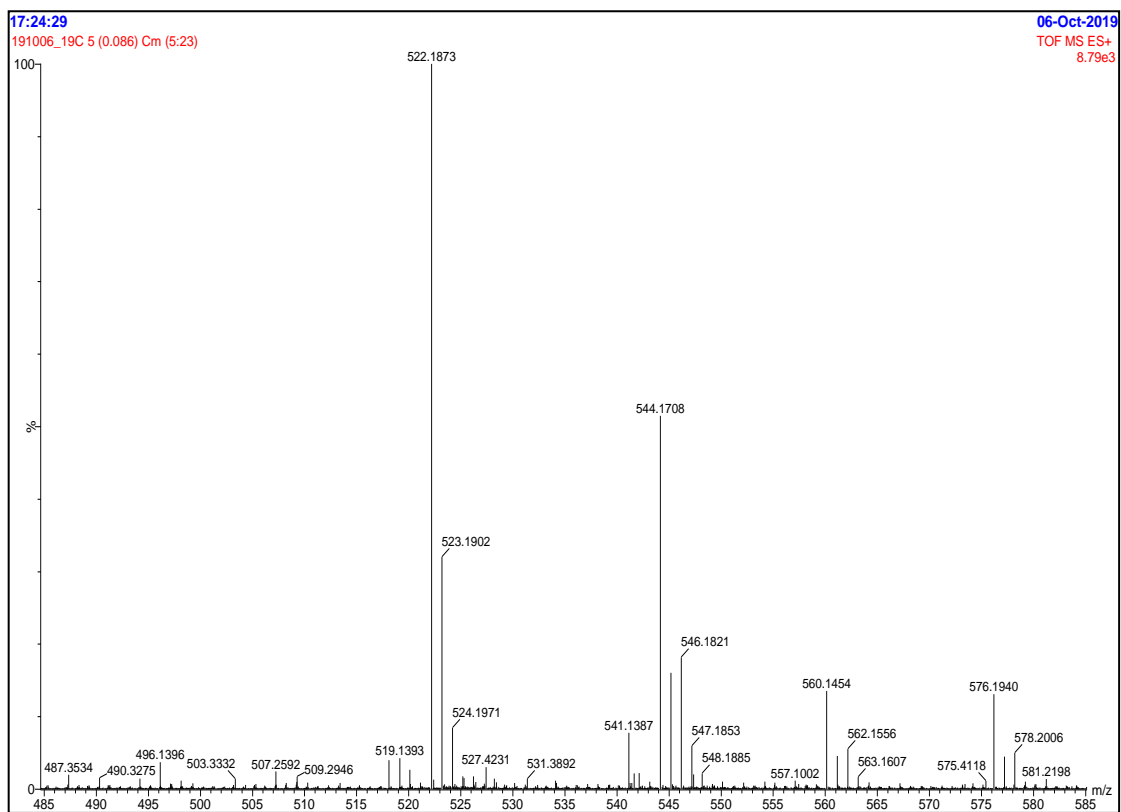

# compound 19j

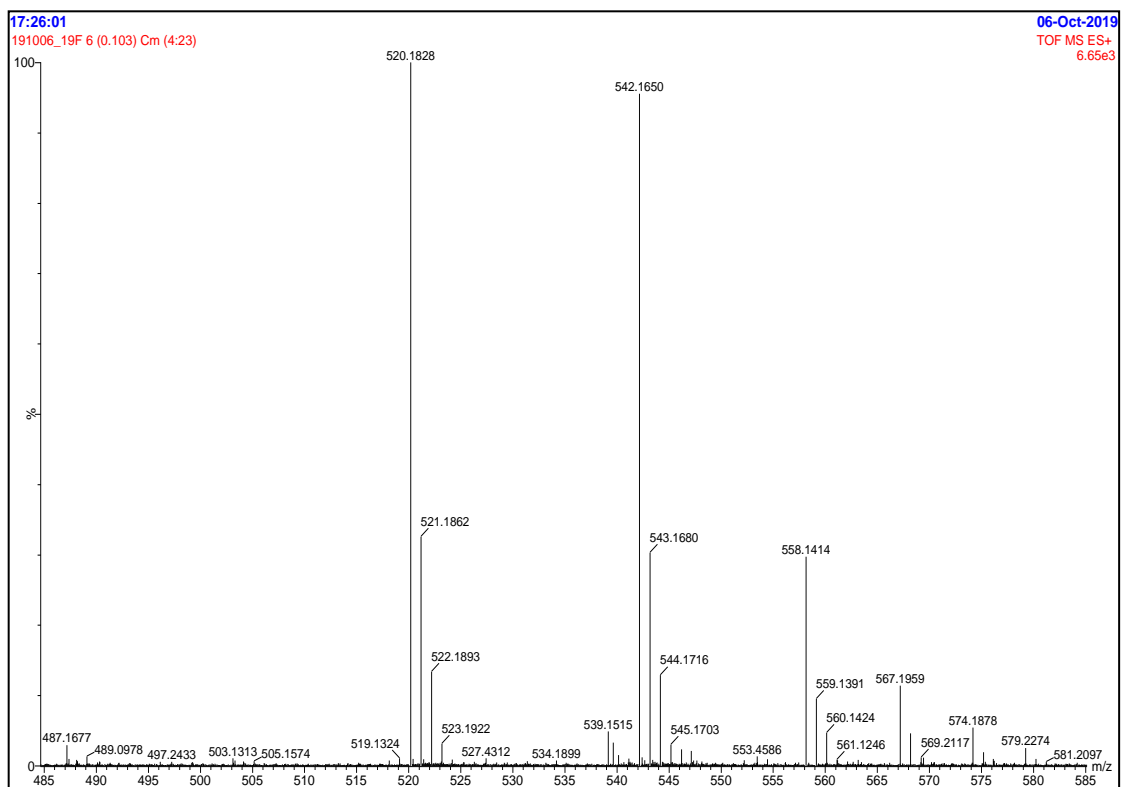

# compound 19k

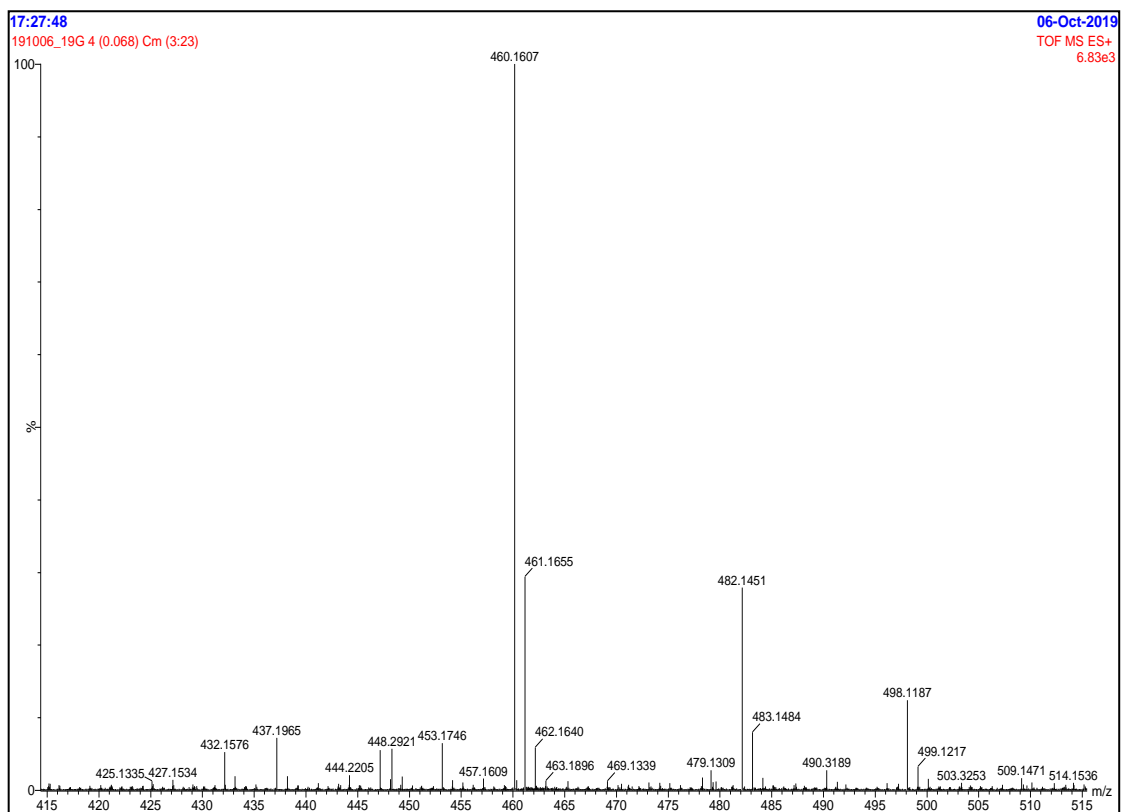

# compound 19l

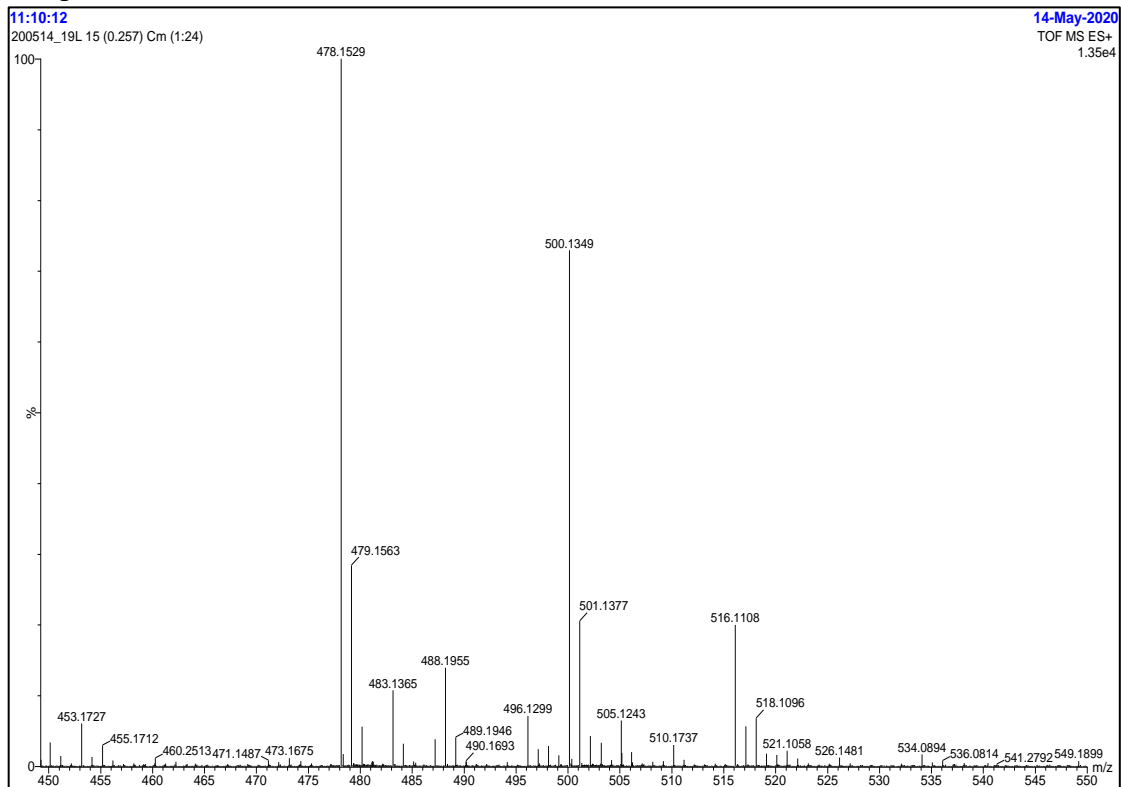

# compound 19m

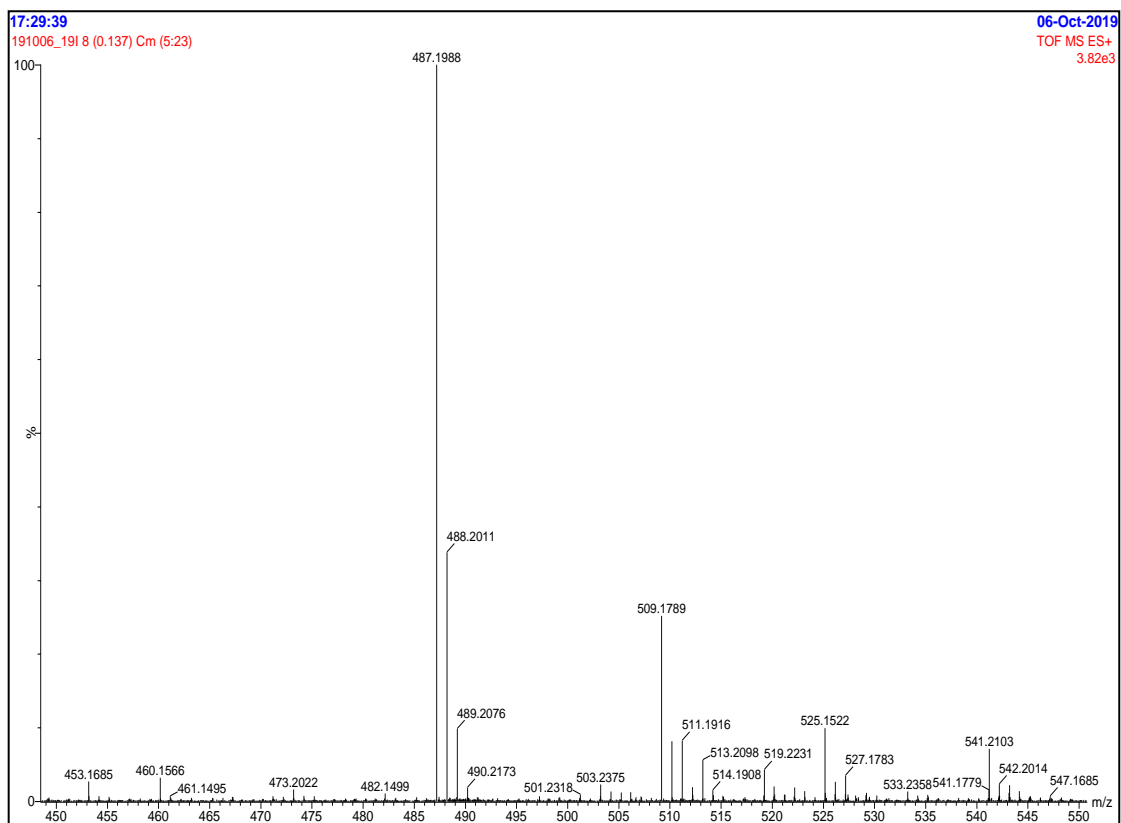

# compound 19n

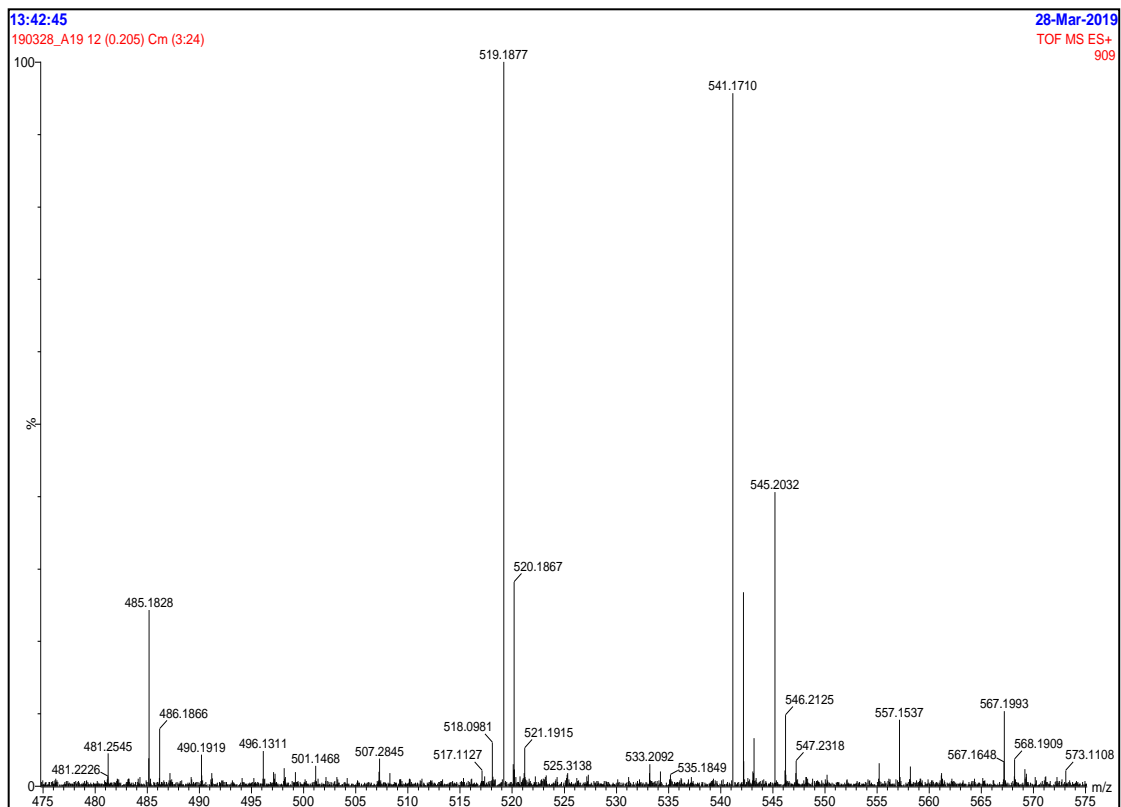

### compound 19o

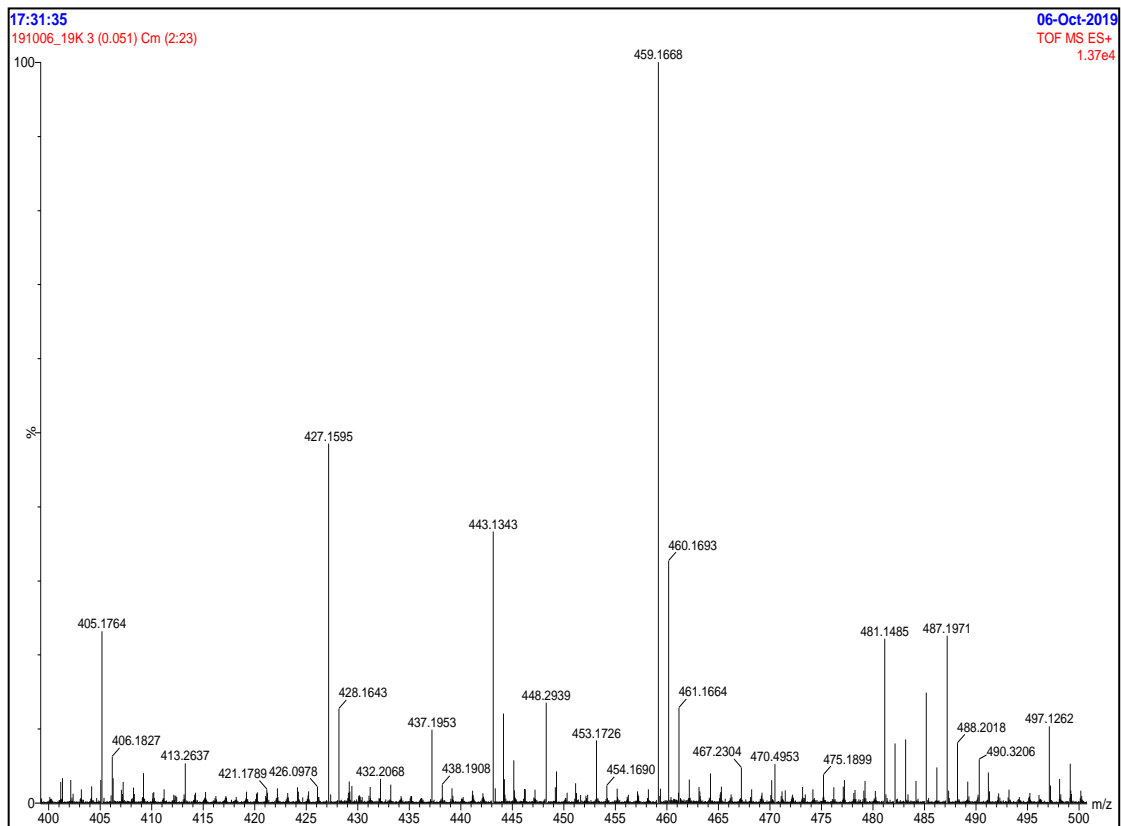

### compound 19p

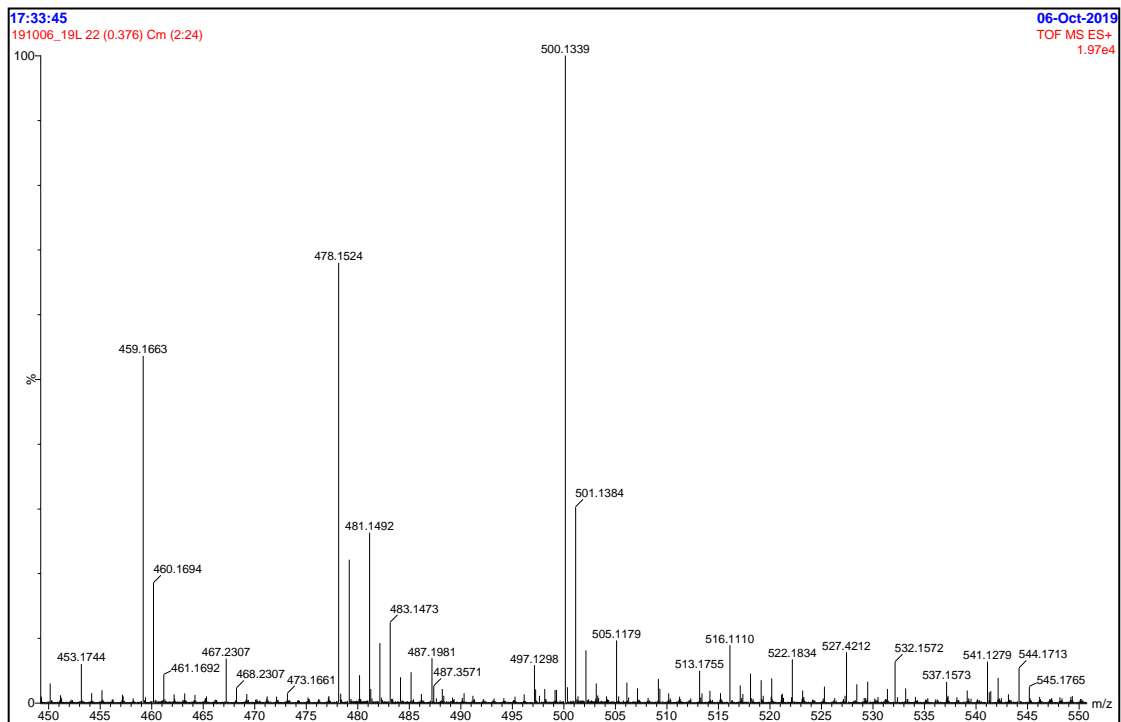

# compound 19q

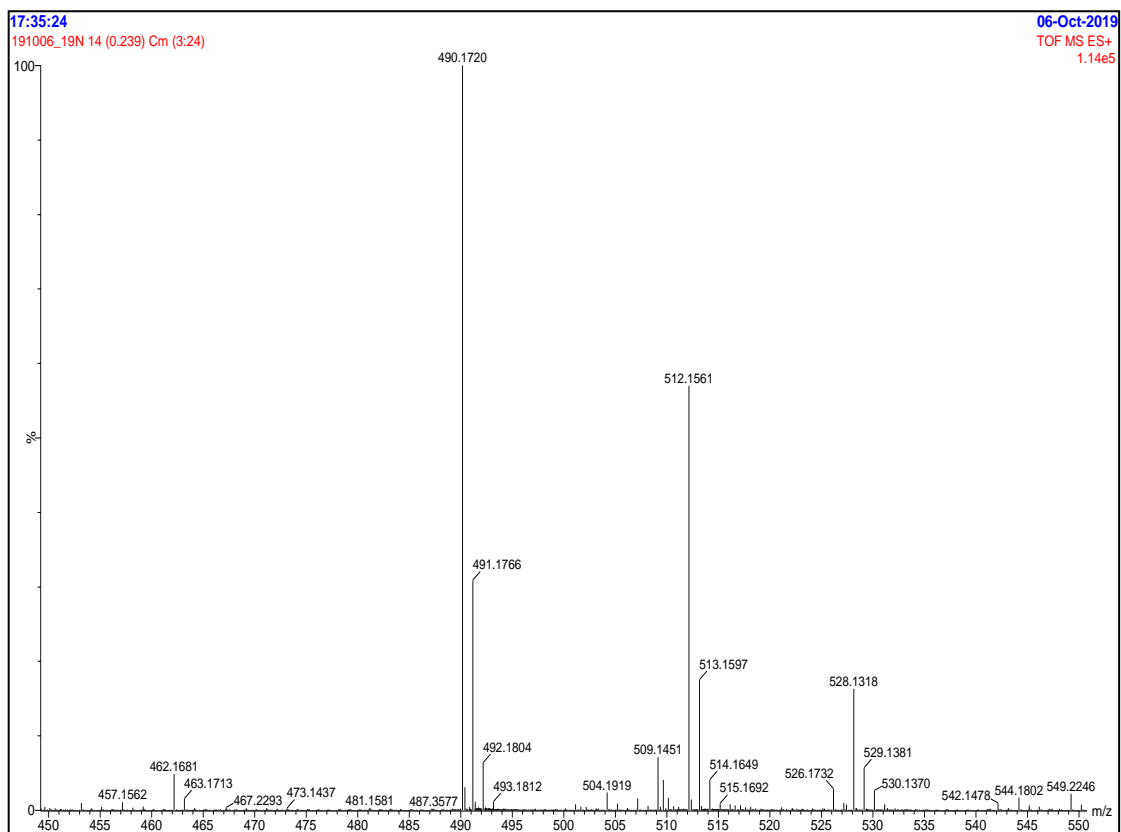

# compound 19r

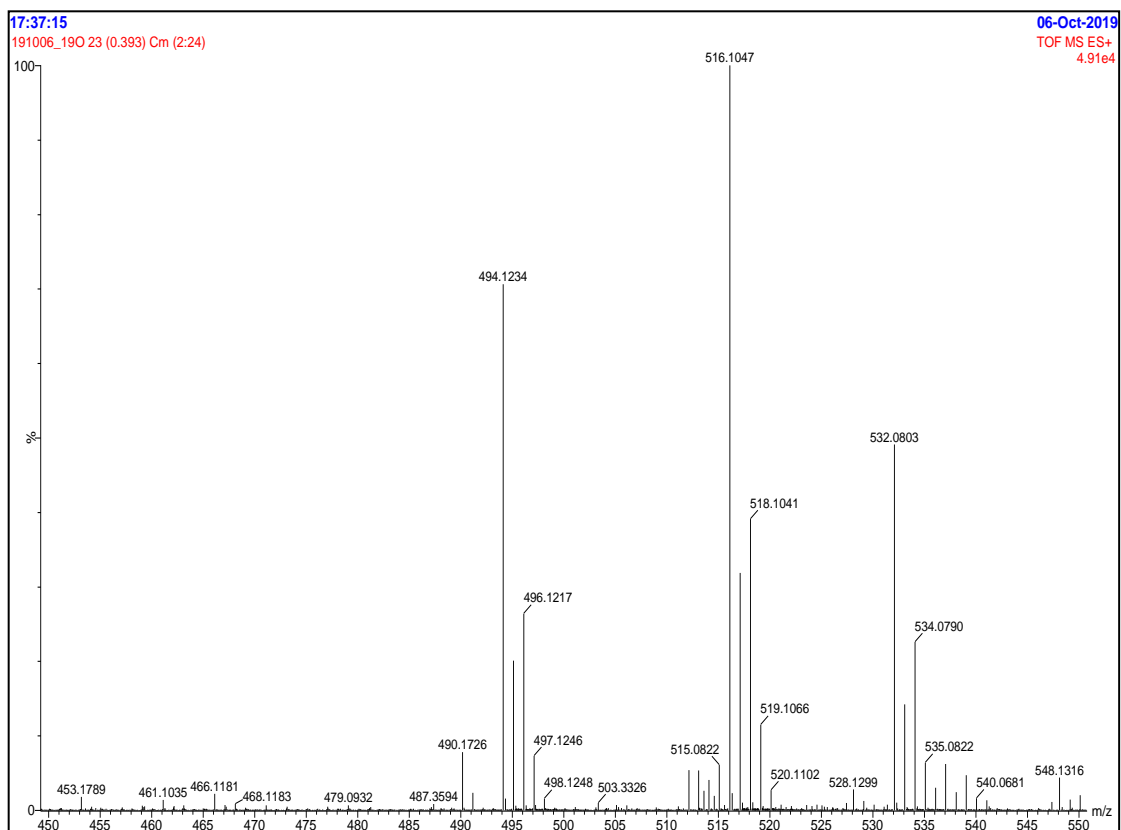

compound 19t

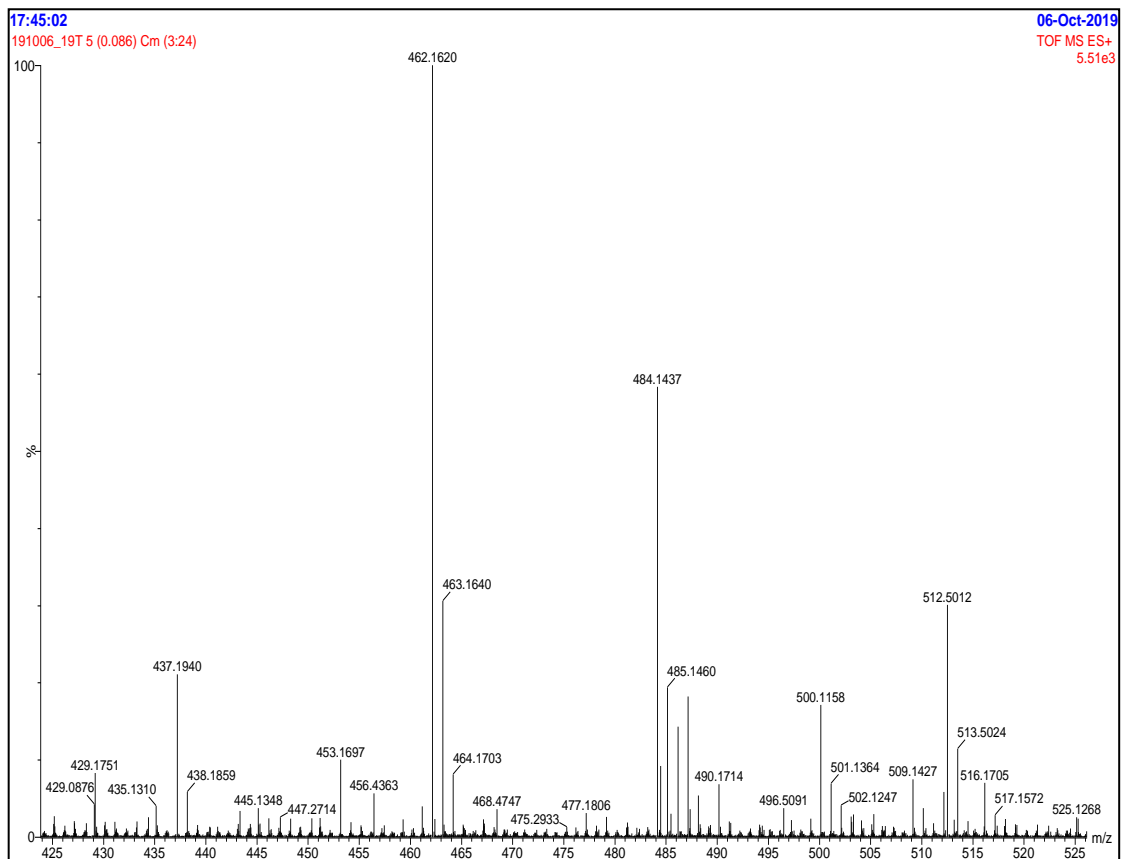

Supplement: mmc1.pdf [file mmc1.pdf]
